# Supplementary material for: Motor skills and fitness in African children: the PERF-FIT study
Source: Research Square preprint supplement (doi:10.21203/rs.3.rs-6033383/v1), 2025-02-28
Supplement: Supplementary file 1 [file 302e76a35a571e5f6f391533.xlsx]

## Sheet: LadderRunScale
Test	Gender	Age	Scale score	Total_Score_min	Total_Score_max
LadderRunScale	Boys	6	1	13.81	15.85
			2
			3	13.14	13.8
			4	12.51	13.13
			5	12.25	12.5
			6	11.7	12.24
			7	11.01	11.69
			8	10.59	11
			9	10.11	10.58
			10	9.24	10.1
			11	8.71	9.23
			12	8.35	8.7
			13	7.21	8.34
			14	7.01	7.2
			15	5.81	7
			16	0	5.8
LadderRunScale	Boys	7	1	13.1	15.25
			2	12.51	13.09
			3	11.85	12.5
			4	11.47	11.84
			5	11.13	11.46
			6	10.75	11.12
			7	9.98	10.74
			8	9.59	9.97
			9	9.21	9.58
			10	8.39	9.2
			11	7.94	8.38
			12	7.65	7.93
			13	6.87	7.64
			14	6.47	6.86
			15	6.11	6.46
			16	0	6.1
LadderRunScale	Boys	8	1	11.54	13.2
			2	11.26	11.53
			3	11.04	11.25
			4	10.31	11.03
			5	9.92	10.3
			6	9.56	9.91
			7	8.81	9.55
			8	8.45	8.8
			9	8.05	8.44
			10	7.31	8.04
			11	6.89	7.3
			12	6.58	6.88
			13	5.81	6.57
			14	5.47	5.8
			15	4.95	5.46
			16	0	4.94
LadderRunScale	Boys	9	1	10.07	11.46
			2
			3	9.89	10.06
			4	9.18	9.88
			5	9.01	9.17
			6	8.61	9
			7	8.11	8.6
			8	7.82	8.1
			9	7.51	7.81
			10	6.92	7.5
			11	6.54	6.91
			12	6.33	6.53
			13	5.73	6.32
			14	5.41	5.72
			15	5.11	5.4
			16	4.48	5.1
			17	0	4.47
LadderRunScale	Boys	10	1	9.67	9.99
			2	9.3	9.66
			3	9.09	9.29
			4	8.51	9.08
			5	8.36	8.5
			6	8.14	8.35
			7	7.6	8.13
			8	7.34	7.59
			9	7.07	7.33
			10	6.53	7.06
			11	6.21	6.52
			12	5.99	6.2
			13	5.45	5.98
			14	5.14	5.44
			15	4.76	5.13
			16	3.98	4.75
			18	0	3.97
LadderRunScale	Boys	11	1	9.34	9.5
			2	8.8	9.33
			3		|
			4	8.16	8.79
			5	7.98	8.15
			6	7.69	7.97
			7	7.16	7.68
			8	6.88	7.15
			9	6.64	6.87
			10	6.09	6.63
			11	5.73	6.08
			12	5.55	5.72
			13	4.95	5.54
			14	4.61	4.94
			15	4.35	4.6
			16	0	4.34
LadderRunScale	Boys	12	1	8.68	13.67
			2
			3
			4	7.67	8.67
			5
			6
			7	7.07	7.66
			8	6.79	7.06
			9	6.51	6.78
			10	5.93	6.5
			11	5.58	5.92
			12	5.36	5.57
			13	4.76	5.35
			14	0	4.75
LadderRunScale	Girls	6	1	13.69	18.93
			2
			3	13.16	13.68
			4	12.54	13.15
			5	12.21	12.53
			6	11.76	12.2
			7	10.95	11.75
			8	10.53	10.94
			9	10.09	10.52
			10	9.22	10.08
			11	8.71	9.21
			12	8.38	8.7
			13	7.56	8.37
			14	7.17	7.55
			15	6.73	7.16
			16	5.76	6.72
			17	0	5.75
LadderRunScale	Girls	7	1	13.43	16.4
			2	13.14	13.42
			3	12.81	13.13
			4	11.94	12.8
			5	11.34	11.93
			6	11.08	11.33
			7	10.24	11.07
			8	9.88	10.23
			9	9.45	9.87
			10	8.6	9.44
			11	8.08	8.59
			12	7.75	8.07
			13	6.69	7.74
			14	6.45	6.68
			15	5.95	6.44
			16	5.1	5.94
			17	0	5.09
LadderRunScale	Girls	8	1	11.64	13.79
			2	11.28	11.63
			3	10.9	11.27
			4	10.26	10.89
			5	9.95	10.25
			6	9.59	9.94
			7	8.91	9.58
			8	8.58	8.9
			9	8.23	8.57
			10	7.52	8.22
			11	7.11	7.51
			12	6.82	7.1
			13	6.11	6.81
			14	5.76	6.1
			15	5.31	5.75
			16	0	5.3
LadderRunScale	Girls	9	1	10.54	12.29
			2	10.18	10.53
			3	10.09	10.17
			4	9.4	10.08
			5	9.08	9.39
			6	8.85	9.07
			7	8.21	8.84
			8	7.85	8.2
			9	7.52	7.84
			10	6.89	7.51
			11	6.51	6.88
			12	6.23	6.5
			13	5.54	6.22
			14	5.26	5.53
			15	4.89	5.25
			16	0	4.88
LadderRunScale	Girls	10	1	10.4	13.87
			2	10.08	10.39
			3	9.75	10.07
			4	9.12	9.74
			5	8.89	9.11
			6	8.53	8.88
			7	7.93	8.52
			8	7.61	7.92
			9	7.3	7.6
			10	6.65	7.29
			11	6.26	6.64
			12	6.01	6.25
			13	5.35	6
			14	4.98	5.34
			15	0	4.97
LadderRunScale	Girls	11	1	9.24	11.11
			2
			3	8.98	9.23
			4	8.4	8.97
			5	8.11	8.39
			6	7.84	8.1
			7	7.38	7.83
			8	7.09	7.37
			9	6.83	7.08
			10	6.3	6.82
			11	5.92	6.29
			12	5.73	5.91
			13	5.2	5.72
			14	4.88	5.19
			15	0	4.87
LadderRunScale	Girls	12	1	8.84	11.31
			2
			3
			4	8.42	8.83
			5	8.03	8.41
			6	7.82	8.02
			7	7.25	7.81
			8	6.98	7.24
			9	6.63	6.97
			10	6.08	6.62
			11	5.76	6.07
			12	5.51	5.75
			13	4.94	5.5
			14	0	4.93

## Sheet: LadderStepsScale
Test	Gender	Age	Scale score	Total_Score_min	Total_Score_max
LadderStepsScale	Boys	6	1	29.01	34.12
			2
			3	28.13	29
			4	26.33	28.12
			5	25.37	26.32
			6	24.39	25.36
			7	22.65	24.38
			8	21.71	22.64
			9	20.91	21.7
			10	19.21	20.9
			11	17.89	19.2
			12	17.41	17.88
			13	15.43	17.4
			14	14.41	15.42
			15	13.72	14.4
			16	0	13.71
LadderStepsScale	Boys	7	1	30.45	34.2
			2	28.31	30.44
			3
			4	26.38	28.3
			5	25.38	26.37
			6	24.41	25.37
			7	22.35	24.4
			8	21.39	22.34
			9	20.38	21.38
			10	18.4	20.37
			11	17.19	18.39
			12	16.39	17.18
			13	14.36	16.38
			14	13.09	14.35
			15	10.91	13.08
			16	10.1	10.9
			17	0	10.09
LadderStepsScale	Boys	8	1	23.63	28
			2
			3
			4	21.89	23.62
			5	21.04	21.88
			6	20.19	21.03
			7	18.54	20.18
			8	17.7	18.53
			9	16.76	17.69
			10	15.11	16.75
			11	14	15.1
			12	13.45	13.99
			13	11.73	13.44
			14	10.71	11.72
			15	9.79	10.7
			16	0	9.78
LadderStepsScale	Boys	9	1	22.19	23.21
			2	21.86	22.18
			3	20.82	21.85
			4	19.76	20.81
			5	18.95	19.75
			6	18.11	18.94
			7	16.95	18.1
			8	16.26	16.94
			9	15.56	16.25
			10	14.15	15.55
			11	13.25	14.14
			12	12.61	13.24
			13	11.33	12.6
			14	10.65	11.32
			15	9.79	10.64
			16	0	9.78
LadderStepsScale	Boys	10	2	21.37	26.87
			3	20.99	21.36
			4	19.27	20.98
			5	18.91	19.26
			6	18.08	18.9
			7	16.57	18.07
			8	15.7	16.56
			9	15.01	15.69
			10	13.42	15
			11	12.51	13.41
			12	11.83	12.5
			13	10.17	11.82
			14	9.11	10.16
			15	8.35	9.1
			16	6.64	8.34
			17	0	6.63
LadderStepsScale	Boys	11	1	19.13	24.51
			2	18.81	19.12
			3	18.04	18.8
			4	17.07	18.03
			5	16.29	17.06
			6	15.22	16.28
			7	14.6	15.21
			8	14.01	14.59
			9	13.4	14
			10	12.16	13.39
			11	11.36	12.15
			12	10.86	11.35
			13	9.7	10.85
			14	9.07	9.69
			15	0	9.06
LadderStepsScale	Boys	12	1	20.45	28.38
			2	18.87	20.44
			3
			4	16.79	18.86
			5
			6	16.02	16.78
			7	14.48	16.01
			8	14.14	14.47
			9	13.37	14.13
			10	11.95	13.36
			11	11.04	11.94
			12	10.54	11.03
			13	8.89	10.53
			14	8.33	8.88
			15	0	8.32
LadderStepsScale	Girls	6	1	32.95	33.79
			2	31.98	32.94
			3	30.35	31.97
			4	27.41	30.34
			5
			6	25.76	27.4
			7	23.51	25.75
			8	22.42	23.5
			9	21.45	22.41
			10	19.01	21.44
			11	17.34	19
			12	16.48	17.33
			13	14.11	16.47
			14	12.86	14.1
			15	11.67	12.85
			16	0	11.66
LadderStepsScale	Girls	7	1	28.89	31.06
			2	28.01	28.88
			3	26.9	28
			4	25.53	26.89
			5	24.64	25.52
			6	23.72	24.63
			7	21.82	23.71
			8	20.87	21.81
			9	19.98	20.86
			10	18.1	19.97
			11	16.91	18.09
			12	16.21	16.9
			13	14.29	16.2
			14	13.39	14.28
			15	12.44	13.38
			16	0	12.43
LadderStepsScale	Girls	8	1	24.71	27.25
			2	23.91	24.7
			3	22.95	23.9
			4	21.56	22.94
			5	20.63	21.55
			6	20.01	20.62
			7	18.42	20
			8	17.61	18.41
			9	16.85	17.6
			10	15.23	16.84
			11	14.31	15.22
			12	13.69	14.3
			13	11.86	13.68
			14	11.17	11.85
			15	10.16	11.16
			16	0	10.15
LadderStepsScale	Girls	9	1	21.31	26.47
			2	20.96	21.3
			3	19.49	20.95
			4	19.01	19.48
			5	18.24	19
			6	17.63	18.23
			7	16.31	17.62
			8	15.66	16.3
			9	14.99	15.65
			10	13.6	14.98
			11	12.82	13.59
			12	12.2	12.81
			13	10.89	12.19
			14	10.23	10.88
			15	9.39	10.22
			16	7.95	9.38
			17	0	7.94
LadderStepsScale	Girls	10	1	22.65	28.17
			2	21.33	22.64
			3	20.99	21.32
			4	19.07	20.98
			5	18.36	19.06
			6	17.82	18.35
			7	16.2	17.81
			8	15.23	16.19
			9	14.67	15.22
			10	13.1	14.66
			11	12.14	13.09
			12	11.48	12.13
			13	9.67	11.47
			14	9.11	9.66
			15	8.3	9.1
			16	0	8.29
LadderStepsScale	Girls	11	1	19.8	22.94
			2
			3	19.21	19.79
			4	17.79	19.2
			5	16.99	17.78
			6	16.4	16.98
			7	14.9	16.39
			8	14.41	14.89
			9	13.71	14.4
			10	12.29	13.7
			11	11.45	12.28
			12	10.82	11.44
			13	9.42	10.81
			14	8.7	9.41
			15	8.01	8.69
			16	0	8
LadderStepsScale	Girls	12	1	19.07	23.48
			2
			3	18.17	19.06
			4	16.63	18.16
			5
			6	15.86	16.62
			7	14.44	15.85
			8	13.96	14.43
			9	13.17	13.95
			10	11.95	13.16
			11	11.01	11.94
			12	10.61	11
			13	8.85	10.6
			14	7.88	8.84
			16	0	7.87

## Sheet: SideJumpScale
Test	Gender	Age	Scale score	Total_Score_min	Total_Score_max
SideJumpScale	Boys	6	1	0
			2
			3
			4	1	8
			5
			6	9
			7	10	11
			8	12
			9	13
			10	14	15
			11	16
			12	17
			13	18	19
			14
			15	20	21
			16	22	23
			17
			18	24
			19	25
SideJumpScale	Boys	7	1	0
			2
			3	1	5
			4	6	7
			5	8	9
			6	10
			7	11	12
			8	13
			9	14
			10	15	16
			11	17
			12	18
			13	19	20
			14	21
			15	22
			16	23	24
			17	25	26
			18
			19	27	32
SideJumpScale	Boys	8	1
			2
			3
			4	0	10
			5	11	12
			6	13
			7	14	15
			8	16
			9	17
			10	18	20
			11	21
			12	22
			13	23	24
			14	25	26
			15	27
			16	28	29
			17	30
			18	31
			19	32	34
SideJumpScale	Boys	9	1
			2
			3
			4	0	12
			5	13
			6	14	15
			7	16	17
			8	18	19
			9	20
			10	21	22
			11	23	24
			12	25
			13	26	28
			14	29
			15	30
			16	31	33
			17	34
			18
			19	35	37
SideJumpScale	Boys	10	1
			2	0	7
			3
			4	8	12
			5	13	14
			6	15	16
			7	17	19
			8	20	21
			9	22
			10	23	25
			11	26	27
			12	28	29
			13	30	32
			14	33	34
			15	35
			16	36	37
			17	38	40
			18
			19	41	60
SideJumpScale	Boys	11	1
			2	0	12
			3	13	14
			4	15	17
			5
			6	18	20
			7	21	23
			8	24
			9	25	26
			10	27	29
			11	30	31
			12	32
			13	33	35
			14	36	37
			15	38
			16	39	41
			17	42
			18
			19	43	49
SideJumpScale	Boys	12	1	0	2
			2	3	13
			3
			4	14	17
			5	18	19
			6	20	21
			7	22	24
			8	25
			9	26	27
			10	28	30
			11	31
			12	32	33
			13	34	35
			14	36	37
			15	38
			16	39	40
SideJumpScale	Girls	6	1	0
			2
			3
			4	1	8
			5	9
			6	10
			7	11	12
			8	13
			9	14
			10	15	16
			11	17
			12	18
			13	19	20
			14	21
			15	22
			16	23	24
SideJumpScale	Girls	7	1	0	3
			2	4
			3
			4	5	7
			5	8	9
			6	10
			7	11	13
			8	14
			9	15
			10	16	17
			11	18	19
			12	20
			13	21	22
			14	23
			15	24	25
			16	26	27
			17	28
			18
			19	29	36
SideJumpScale	Girls	8	1	0	2
			2
			3	3	7
			4	8	10
			5	11
			6	12	13
			7	14	15
			8	16	17
			9	18
			10	19	21
			11	22
			12	23
			13	24	26
			14	27
			15	28	29
			16	30	31
			17	32	33
			18	34
			19	35	41
SideJumpScale	Girls	9	1	0	3
			2	4	7
			3
			4	8	12
			5	13
			6	14	15
			7	16	18
			8	19
			9	20	21
			10	22	24
			11	25	26
			12	27
			13	28	30
			14	31	32
			15	33
			16	34	36
			17	37	38
			18
			19	39	40
SideJumpScale	Girls	10	1	0	4
			2	5	8
			3
			4	9	14
			5	15
			6	16	17
			7	18	20
			8	21	22
			9	23
			10	24	26
			11	27	28
			12	29
			13	30	33
			14	34
			15	35	36
			16	37
			17
			18
			19	38	52
SideJumpScale	Girls	11	1	0	9
			2
			3
			4	10	17
			5	18	19
			6	20	21
			7	22	24
			8	25
			9	26	27
			10	28	30
			11	31	32
			12	33
			13	34	36
			14	37	38
			15	39
			16	40	41
			17	42	44
			18	45	46
SideJumpScale	Girls	12	1
			2	0	17
			3	18
			4	19	20
			5	21	22
			6	23	24
			7	25	26
			8	27	28
			9	29
			10	30	32
			11	33	34
			12	35
			13	36	38
			14	39
			15
			16	40	42
			17
			18	41	46

## Sheet: LongJumpScale
Test	Gender	Age	Scale score	Total_Score_min	Total_Score_max
LongJumpScale	Boys	6	1
			2
			3	0	45
			4	46	53
			5	54	61
			6	62	65
			7	66	75
			8	76	80
			9	81	85
			10	86	95
			11	96	100
			12	101	105
			13	106	115
			14	116	120
			15	121	125
			16	126	134
			17
			18	135	141
			19	142	157
LongJumpScale	Boys	7	1	0	41
			2
			3	42	56
			4	57	66
			5	67	71
			6	72	76
			7	77	87
			8	88	92
			9	93	97
			10	98	107
			11	108	114
			12	115	118
			13	119	128
			14	129	132
			15	133	138
			16	139	148
			17	149	154
			18	155
			19	156	160
LongJumpScale	Boys	8	1	0	50
			2
			3	51	67
			4	68	78
			5	79	84
			6	85	89
			7	90	100
			8	101	105
			9	106	111
			10	112	122
			11	123	128
			12	129	132
			13	133	143
			14	144	149
			15	150	154
			16	155	160
			17	161	169
			18
			19	170	217
LongJumpScale	Boys	9	1	0	50
			2
			3	51	75
			4	76	84
			5	85	90
			6	91	96
			7	97	107
			8	108	112
			9	113	117
			10	118	128
			11	129	134
			12	135	138
			13	139	149
			14	150	154
			15	155	159
			16	160	169
			17
			18
			19	170	210
LongJumpScale	Boys	10	1
			2	0	75
			3	76	83
			4	84	94
			5	95	99
			6	100	104
			7	105	114
			8	115	119
			9	120	124
			10	125	135
			11	136	140
			12	141	145
			13	146	155
			14	156	160
			15	161	164
			16	165	173
			17
			18
			19	174	197
LongJumpScale	Boys	11	1	0	73
			2
			3
			4	74	98
			5	99	105
			6	104	109
			7	110	120
			8	121	125
			9	126	130
			10	131	139
			11	140	145
			12	146	149
			13	150	157
			14	158	162
			15	163	167
			16	168	177
LongJumpScale	Boys	12	1	0	57
			2
			3
			4	58	95
			5	96	100
			6	101	109
			7	110	123
			8	124	129
			9	130	135
			10	136	147
			11	148	152
			12	153	157
			13	158	171
			14	172	176
			15	177	178
			16	179	191
			17	192	197
LongJumpScale	Girls	6	1	0	33
			2
			3
			4	34	54
			5
			6	55	62
			7	63	74
			8	75	77
			9	78	83
			10	84	92
			11	93	97
			12	98	102
			13	103	111
			14	112	115
			15	116	119
			16	120	129
			17	130	135
			18	136	138
			19	139	156
LongJumpScale	Girls	7	1
			2
			3	0	53
			4	54	64
			5	65	69
			6	70	74
			7	75	84
			8	85	90
			9	91	95
			10	96	105
			11	106	111
			12	112	115
			13	116	126
			14	127	130
			15	131	136
			16	137	142
			17	143	149
			18
			19	150	224
LongJumpScale	Girls	8	1
			2	0	60
			3
			4	61	74
			5	75	78
			6	79	83
			7	84	92
			8	93	97
			9	98	102
			10	103	111
			11	112	117
			12	118	120
			13	121	130
			14	131	132
			15	133	139
			16	140	146
			17	147	149
			18	150	155
			19	156	160
LongJumpScale	Girls	9	1	0	42
			2
			3	43	69
			4	70	78
			5	79	83
			6	84	90
			7	91	100
			8	101	104
			9	105	109
			10	110	119
			11	120	125
			12	126	129
			13	130	139
			14	140	144
			15	145	148
			16	149	158
			17	159	160
			18	161	164
			19	165	195
LongJumpScale	Girls	10	1	0	74
			2
			3
			4	75	92
			5	93	96
			6	97	101
			7	102	110
			8	111	114
			9	115	119
			10	120	128
			11	129	133
			12	134	136
			13	137	145
			14	146	150
			15	151	154
			16	155	162
LongJumpScale	Girls	11	1
			2	0	73
			3	74	78
			4	79	83
			5	84	94
			6	95
			7	96	109
			8	110	114
			9	115	120
			10	121	130
			11	131	136
			12	137	140
			13	141	151
			14	152	156
			15	157	159
			16	160	171
			17
			18	172	181
			19	182	185
LongJumpScale	Girls	12	1	0	48
			2
			3
			4	49	84
			5
			6	85	94
			7	95	111
			8	112	117
			9	118	124
			10	126	136
			11	137	144
			12	145	149
			13	150	161
			14	162	164
			15	165	171
			16
			17	172	187

## Sheet: OverhandthrowScale
Test	Gender	Age	Scale score	Total_Score_min	Total_Score_max
OverhandthrowScale	Boys	6	1
			2
			3
			4	0	91
			5	92	101
			6	102	112
			7	113	128
			8	129	137
			9	138	145
			10	146	162
			11	163	171
			12	172	178
			13	179	195
			14	196	200
			15	201	210
			16	211	227
OverhandthrowScale	Boys	7	1
			2
			3
			4	0	97
			5	98	107
			6	108	116
			7	117	135
			8	136	145
			9	146	154
			10	155	173
			11	174	184
			12	185	192
			13	193	210
			14	211	220
			15	221	225
			16	226	248
			17	249	255
			18
			19	256	294
OverhandthrowScale	Boys	8	1
			2
			3	0	93
			4	94	113
			5	114	129
			6	130	141
			7	142	164
			8	165	175
			9	176	186
			10	187	210
			11	211	224
			12	225	231
			13	232	255
			14	256	266
			15	267	280
			16	281	302
			17	303	310
			18	311	323
			19	324	347
OverhandthrowScale	Boys	9	1	0	109
			2
			3	110	130
			4	131	151
			5	152	162
			6	163	173
			7	174	194
			8	195	204
			9	205	214
			10	215	235
			11	236	248
			12	249	255
			13	256	277
			14	278	288
			15	289	292
			16	293	317
			17	318	324
			18	325	340
			19	341	354
OverhandthrowScale	Boys	10	1
			2
			3	0	145
			4	146	169
			5	170	182
			6	183	193
			7	194	214
			8	215	224
			9	225	234
			10	235	255
			11	256	267
			12	268	274
			13	275	292
			14	293	305
			15	306	315
			16
			17	316	348
			18	349	351
			19	352	385
OverhandthrowScale	Boys	11	1
			2
			3
			4	0	184
			5	185	197
			6	198	210
			7	211	236
			8	237	249
			9	250	261
			10	262	288
			11	289	304
			12	305	314
			13	315	340
			14	341	346
			15	347	366
			16	367	381
			17	382	400
			18
			19	401	487
OverhandthrowScale	Boys	12	1
			2
			3	0	157
			4	158	196
			5
			6	197	230
			7	231	262
			8	263	280
			9	281	294
			10	295	325
			11	326	343
			12	344	354
			13	355	382
			14	383	400
			15	401	407
			16	408	443
			17	444	458
			18	459	480
OverhandthrowScale	Girls	6	1
			2
			3	0	46
			4	47	59
			5	60	80
			6
			7	81	113
			8	114	124
			9	125	134
			10	135	152
			11	153	165
			12	166	175
			13	176	196
			14	197	205
			15	206	212
			16
			17	213	243
			18
			19	244	335
OverhandthrowScale	Girls	7	1
			2	0	56
			3
			4	57	87
			5	88	98
			6	99	107
			7	108	127
			8	128	137
			9	138	147
			10	148	166
			11	167	178
			12	179	186
			13	187	205
			14	206	215
			15	216	225
			16	226	244
			17	245	250
			18	251	256
			19	257	296
OverhandthrowScale	Girls	8	1
			2
			3	0	85
			4	86	108
			5	109	119
			6	120	129
			7	130	151
			8	152	161
			9	162	172
			10	173	192
			11	193	206
			12	207	215
			13	216	235
			14	236	246
			15	247	257
			16	258	275
			17	276	285
			18
			19	386	336
OverhandthrowScale	Girls	9	1	0	80
			2	81	93
			3	94	106
			4	107	124
			5	125	138
			6	139	151
			7	152	173
			8	174	185
			9	186	197
			10	198	219
			11	220	233
			12	234	241
			13	242	265
			14	266	276
			15	277	287
			16	288	310
			17	311	318
			18	319	331
			19	332	357
OverhandthrowScale	Girls	10	1
			2	0	113
			3	114	124
			4	125	141
			5	142	163
			6	164	174
			7	175	197
			8	198	210
			9	211	221
			10	222	245
			11	246	258
			12	259	269
			13	270	291
			14	292	303
			15
			16	304	338
			17
			18	339	359
			19	360	374
OverhandthrowScale	Girls	11	1
			2	0	129
			3
			4	130	163
			5	164	182
			6	183	192
			7	193	216
			8	217	228
			9	229	241
			10	242	264
			11	265	276
			12	277	287
			13	288	312
			14	313	324
			15	325	336
			16	337	356
			17	357	365
OverhandthrowScale	Girls	12	1
			2
			3
			4	0	181
			5	182	197
			6	198	216
			7	217	243
			8	244	258
			9	259	273
			10	274	302
			11	303	319
			12	320	330
			13	331	350
			14	351	369
			15	370	385
			16	386	400
			17	401	430

## Sheet: BounceScale
Test	Gender	Age	Scale score	Total_Score_min	Total_Score_max
BounceScale	Boys	6	1
			2
			3
			4	0	5
			5	6	8
			6	9	11
			7	12	17
			8	18	21
			9	22	24
			10	25	30
			11	31	33
			12	34	36
			13	37	42
			14	43	44
			15	45	48
			16	49	50
BounceScale	Boys	7	1
			2
			3	0	2
			4	3	7
			5	8	11
			6	12	15
			7	16	21
			8	22	24
			9	25	28
			10	29	34
			11	35	38
			12	39	41
			13	42	47
			14	48	50
BounceScale	Boys	8	1	0	9
			2	10	11
			3	12	15
			4	16	20
			5	21	23
			6	24	25
			7	26	31
			8	32	33
			9	34	36
			10	37	41
			11	42	44
			12	45	46
			13	47	50
BounceScale	Boys	9	1	0	14
			2
			3	15	19
			4	20	25
			5	26	27
			6	28	30
			7	31	34
			8	35	36
			9	37	39
			10	40	44
			11	45	46
			12	47	48
			13	49	50
BounceScale	Boys	10	1	0	23
			2
			3	24	28
			4	29	30
			5	31	33
			6	34	35
			7	36	39
			8	40
			9	41	42
			10	43	46
			11	47	48
			12	49
			13	50
BounceScale	Boys	11	1	0	29
			2	30	34
			3
			4
			5	35	39
			6
			7	40	43
			8	44
			9	45
			10	46	48
			11	49
			12	50
BounceScale	Boys	12	1	0	14
			2
			3
			4
			5	15	40
			6
			7	41	44
			8	45
			9	46
			10	47	48
			11	49
			12	50
BounceScale	Girls	6	1
			2
			3
			4
			5	0
			6	1	3
			7	4	11
			8	12	15
			9	16	18
			10	19	26
			11	27	30
			12	31	33
			13	34	40
			14	41	44
			15	45	47
			16	48	50
BounceScale	Girls	7	1
			2
			3
			4	0	5
			5	6	9
			6	10	12
			7	13	19
			8	20	22
			9	23	25
			10	26	32
			11	33	36
			12	37	39
			13	40	45
			14	46	49
			15	50
BounceScale	Girls	8	1	0	4
			2	5	7
			3	8	9
			4	10	15
			5	16	18
			6	19	20
			7	21	26
			8	27	29
			9	30	32
			10	33	37
			11	38	41
			12	42	43
			13	44	48
			14	49	50
BounceScale	Girls	9	1	0	14
			2
			3	15	18
			4	19	23
			5	24	25
			6	26	28
			7	29	33
			8	34	35
			9	36	37
			10	38	42
			11	43	45
			12	46	47
			13	48	50
BounceScale	Girls	10	1	0	15
			2	16	19
			3
			4	20	25
			5	26	28
			6	29	30
			7	31	35
			8
			9	36	40
			10	41	44
			11	45	47
			12	48	49
			13	50
			14
BounceScale	Girls	11	1	0	20
			2	21	24
			3
			4
			5	25	32
			6
			7	33	38
			8	39	40
			9	41	42
			10	43	46
			11	47	48
			12	49	50
			13
BounceScale	Girls	12	1	0	26
			2	27	30
			3	31
			4
			5	32	36
			6	37	38
			7	39
			8	40	42
			9	43	44
			10	45	47
			11	48
			12	49	50

## Sheet: ThrowScale
Test	Gender	Age	Scale score	Total_Score_min	Total_Score_max
ThrowScale	Boys	6	1
			2
			3	0	2
			4	3	5
			5	6	10
			6	11	13
			7	14	19
			8	20	22
			9	23	25
			10	26	31
			11	32	34
			12	35	36
			13	37	42
			14	43	45
			15	46	48
			16
ThrowScale	Boys	7	1
			2	0	1
			3	2	4
			4	5	10
			5	11	13
			6	14	17
			7	18	23
			8	24	26
			9	27	29
			10	30	35
			11	36	39
			12	40	41
			13	42	47
			14	48	50
			15
ThrowScale	Boys	8	1	0	6
			2	7	13
			3	14	15
			4	16	21
			5	22	23
			6	24	26
			7	27	31
			8	32	33
			9	34	36
			10	37	41
			11	42	44
			12	45	46
			13	47	50
			14
ThrowScale	Boys	9	1	0	20
			2	21	22
			3
			4	23	28
			5	29	30
			6	31	32
			7	33	35
			8	36	38
			9	39	40
			10	41	44
			11	45	46
			12	47	48
			13	49	50
ThrowScale	Boys	10	1	0	19
			2	20	25
			3	26	27
			4	28	31
			5	32	33
			6	34	35
			7	36	39
			8	40	41
			9	42
			10	43	46
			11	47	48
			12	49
			13	50
ThrowScale	Boys	11	1	0	33
			2	34	40
			3
			4	41
			5	42	43
			6
			7	44	45
			8	46
			9	47
			10	48
			11	49
			12	50
ThrowScale	Boys	12	1	0	24
			2
			3
			4
			5
			6	25	40
			7	41	43
			8
			9	44	46
			10	47	48
			11	49	50
ThrowScale	Girls	6	1
			2
			3
			4
			5	0	3
			6	4	6
			7	7	13
			8	14	17
			9	18	20
			10	21	26
			11	27	31
			12	32	34
			13	35	41
			14	42	45
			15	46	47
			16	48	50
ThrowScale	Girls	7	1
			2
			3	0	1
			4	2	8
			5	9	11
			6	12	15
			7	16	21
			8	22	24
			9	25	28
			10	29	34
			11	35	38
			12	39	41
			13	42	47
			14	48	50
ThrowScale	Girls	8	1	0	3
			2	4	5
			3	6	9
			4	10	14
			5	15	17
			6	18	20
			7	21	25
			8	26	28
			9	29	31
			10	32	36
			11	37	40
			12	41	42
			13	43	48
			14	49	50
ThrowScale	Girls	9	1	0	14
			2
			3
			4	15	24
			5	25	27
			6	28	29
			7	30	33
			8	34	35
			9	36	38
			10	39	42
			11	43	45
			12	46
			13	47	50
ThrowScale	Girls	10	1	0	21
			2	22	23
			3	24	25
			4	26	27
			5
			6	28	33
			7	34	36
			8	37	38
			9	39	40
			10	41	44
			11	45	47
			12	48
			13	49	50
ThrowScale	Girls	11	1	0	20
			2	21	27
			3	28	29
			4	30	32
			5	33	34
			6	35
			7	36	39
			8	40	41
			9	42
			10	43	46
			11	47	48
			12	49
			13	50
ThrowScale	Girls	12	1	0	13
			2
			3	14	25
			4	26	27
			5
			6
			7	28	39
			8
			9	40	43
			10	44	47
			11	48	50

## Sheet: StaticBalanceScale
Test	Gender	Age	Scale score	Total_Score_min	Total_Score_max
StaticBalanceScale	Boys	6	1
			2
			3	0
			4	1	8
			5	8	16
			6	17	21
			7	22	30
			8	31	35
			9	36	39
			10	40	47
			11	48	53
			12	54	58
			13	59	60
StaticBalanceScale	Boys	7	1	0	18
			2	19
			3	20	24
			4	25	30
			5	31	33
			6	34	36
			7	37	43
			8	44	46
			9	47	49
			10	50	55
			11	56	59
			12	60
StaticBalanceScale	Boys	8	1	0	16
			2	17	27
			3	28
			4	29	35
			5	36	38
			6	39	40
			7	41	45
			8	46	48
			9	49	51
			10	52	56
			11	57	60
StaticBalanceScale	Boys	9	1	0	20
			2
			3	21	34
			4	35	38
			5	39	40
			6	41	44
			7	45	48
			8	49	51
			9	52	53
			10	54	57
			11	58	60
StaticBalanceScale	Boys	10	1	0	31
			2	32	36
			3
			4	37	41
			5	42	44
			6	45
			7	46	49
			8	50	51
			9	52	54
			10	55	58
			11	59	60
StaticBalanceScale	Boys	11	1	0	42
			2
			3
			4	43	51
			5	52	53
			6	54
			7	55
			8	56
			9
			10	57	59
			11	60
StaticBalanceScale	Boys	12	1	0	11
			2
			3
			4
			5	12	50
			6
			7	51	54
			8	55
			9	56	57
			10	58	60
StaticBalanceScale	Girls	6	1	0
			2
			3
			4	1	19
			5	20	24
			6	25	28
			7	29	36
			8	37	40
			9	41	45
			10	46	53
			11	54	57
			12	58	60
StaticBalanceScale	Girls	7	1	0	18
			2	19	22
			3	23	27
			4	28	32
			5	33	35
			6	36	38
			7	39	44
			8	45	47
			9	48	49
			10	50	55
			11	56	58
			12	59	60
StaticBalanceScale	Girls	8	1	0	33
			2	34	35
			3	36	37
			4	38	41
			5	42	44
			6	45
			7	46	49
			8	50	52
			9	53	54
			10	55	58
			11	59	60
StaticBalanceScale	Girls	9	1	0	33
			2	34	35
			3	36	38
			4	39	40
			5	41	43
			6	44	45
			7	46	50
			8	51	52
			9	53
			10	54	57
			11	58	60
StaticBalanceScale	Girls	10	1	0	37
			2
			3	38	39
			4	40	43
			5	44	46
			6	47
			7	48	50
			8	51	52
			9	53
			10	54	58
			11	59	60
StaticBalanceScale	Girls	11	1	0	51
			2
			3
			4	52	54
			5
			6	55	56
			7
			8	57
			9	58
			10	59
			11	60
StaticBalanceScale	Girls	12	1	0	39
			2
			3
			4	40	48
			5
			6	49	51
			7	52	54
			8
			9	55	56
			10	57	60

## Sheet: DynamicBalanceScale
Test	Gender	Age	Scale score	Total_Score_min	Total_Score_max
DynamicBalanceScale	Boys	6	1
			2
			3
			4	0	8
			5	9	10
			6	11	12
			7	13	15
			8	16	17
			9	18	19
			10	20	22
			11	23	24
			12	25
			13	26	29
			14	30
			15	31	32
DynamicBalanceScale	Boys	7	1	0	6
			2
			3	7	10
			4	11	13
			5	14	15
			6	16
			7	17	19
			8	20	21
			9	22
			10	23	26
			11	27
			12	28	29
			13	30	32
DynamicBalanceScale	Boys	8	1	0	12
			2
			3
			4	13	17
			5	18
			6	19
			7	20	22
			8	23
			9	24	25
			10	26	27
			11	28	29
			12	30
			13	31	32
DynamicBalanceScale	Boys	9	1	0	14
			2
			3	15	16
			4	17	18
			5	19	20
			6	21
			7	22	23
			8	24
			9	25
			10	26	28
			11	29
			12	30
			13	31	32
DynamicBalanceScale	Boys	10	1	0	16
			2	17	18
			3	19
			4	20	21
			5	22
			6	23
			7	24	25
			8	26
			9	27
			10	28	29
			11	30
			12	31
			13	32
DynamicBalanceScale	Boys	11	1	0	20
			2	21
			3
			4	22	23
			5	24
			6	25
			7	26	27
			8	28
			9	29	30
			10	31
			11	32
DynamicBalanceScale	Boys	12	1	0	10
			2
			3	11	21
			4	22
			5	23	24
			6
			7	25	26
			8	27
			9	28
			10	29	30
			11	31
			12
			13	32
DynamicBalanceScale	Girls	6	1	0	4
			2
			3
			4	5	11
			5	12	13
			6	14
			7	15	17
			8	18	19
			9	20
			10	21	23
			11	24	25
			12	26
			13	27	29
			14	30	31
			15	32
DynamicBalanceScale	Girls	7	1	0	7
			2
			3
			4	8	15
			5	16	17
			6	18
			7	19	21
			8	22
			9	23	24
			10	25	27
			11	28
			12	29
			13	30	32
DynamicBalanceScale	Girls	8	1	0	14
			2	15	16
			3	17
			4	18	19
			5	20
			6	21
			7	22	23
			8	24
			9	25
			10	26	28
			11	29
			12	30
			13	31	32
DynamicBalanceScale	Girls	9	1	0	15
			2	16	17
			3	18
			4	19	20
			5	21
			6	22
			7	23	24
			8	25
			9	26
			10	27	28
			11	29
			12	30
			13	31	32
DynamicBalanceScale	Girls	10	1	0	17
			2	18
			3	19
			4	20
			5	21	22
			6	23
			7	24	25
			8	26
			9	27
			10	28
			11	29	30
			12
			13	31	32
DynamicBalanceScale	Girls	11	1	0	21
			2	22
			3	23
			4	24
			5	25
			6
			7	26	27
			8	28
			9
			10	29	30
			11	31
			12
			13	32
DynamicBalanceScale	Girls	12	1	0	16
			2
			3	17	22
			4	23	24
			5
			6	25
			7	26	27
			8	28
			9
			10	29	30
			11	31
			12
			13	32

## Sheet: TotalJumpHopScale
Test	Gender	Age	Scale score	Total_Score_min	Total_Score_max
TotalJumpHopScale	Boys	6	1	0	3
			2	4	5
			3
			4	6	15
			5	16	20
			6	21	23
			7	24	30
			8	31	32
			9	33	36
			10	37	43
			11	44	47
			12	48	50
			13	51	56
			14	57	60
TotalJumpHopScale	Boys	7	1	0	6
			2	7	10
			3	11	13
			4	14	20
			5	21	24
			6	25	27
			7	28	34
			8	35	37
			9	38	41
			10	42	48
			11	49	52
			12	53	54
			13	55	60
TotalJumpHopScale	Boys	8	1	0	11
			2	12	13
			3	14	18
			4	19	25
			5	26	28
			6	29	31
			7	32	37
			8	38	40
			9	41	43
			10	44	48
			11	49	53
			12	54	56
			13	57	60
TotalJumpHopScale	Boys	9	1	0	13
			2	14	17
			3	18	21
			4	22	27
			5	28	30
			6	31	34
			7	35	40
			8	41	43
			9	44	46
			10	47	52
			11	53	56
			12	57	59
			13	60
TotalJumpHopScale	Boys	10	1	0	30
			2
			3	31	36
			4	37	40
			5	41	42
			6	43	44
			7	45	48
			8	49	50
			9	51	52
			10	53	56
			11	57	59
			12	60
TotalJumpHopScale	Boys	11	1	0	31
			2
			3
			4
			5
			6	32	48
			7	49	52
			8	53
			9	54	55
			10	56	59
			11	60
TotalJumpHopScale	Boys	12	1	0	25
			2
			3	26	41
			4
			5
			6	42	48
			7	49	51
			8
			9	52	56
			10	57	59
			11	60
TotalJumpHopScale	Girls	6	1
			2
			3	0	9
			4	10	12
			5	13	21
			6	22	24
			7	25	32
			8	33	35
			9	36	39
			10	40	46
			11	47	50
			12	51	53
			13	54	60
TotalJumpHopScale	Girls	7	1	0	10
			2	11	12
			3	13	15
			4	16	23
			5	24	26
			6	27	30
			7	31	36
			8	37	39
			9	40	43
			10	44	49
			11	50	53
			12	54	56
			13	57	60
TotalJumpHopScale	Girls	8	1	0	11
			2
			3	12	19
			4	20	25
			5	26	28
			6	29	31
			7	32	37
			8	38	40
			9	41	44
			10	45	50
			11	51	53
			12	54	56
			13	57	60
TotalJumpHopScale	Girls	9	1	0	21
			2	22	23
			3	24	26
			4	27	32
			5	33	34
			6	35	37
			7	38	42
			8	43	45
			9	46	48
			10	49	53
			11	54	56
			12	57	58
			13	59
TotalJumpHopScale	Girls	10	1	0	31
			2
			3	32	35
			4	36	39
			5	40	42
			6	43	44
			7	45	48
			8	49	50
			9	51	52
			10	53	57
			11	58	59
			12	60
TotalJumpHopScale	Girls	11	1	0	32
			2	33	35
			3	36
			4	37	40
			5	41	43
			6	44	45
			7	46	49
			8	50	51
			9	52	53
			10	54	57
			11	58	60
TotalJumpHopScale	Girls	12	1	0	32
			2
			3
			4	33	42
			5
			6
			7	43	50
			8
			9	51	53
			10	54	58
			11	59	60

[truncated: 3 more sheets: TotalAgilityScale, TotalSkillsScale, TotalPERFFITScale]
