# Supplementary material for: Motor skills and fitness in African children: the PERF-FIT study
Source: Research Square preprint supplement (doi:10.21203/rs.3.rs-6033383/v1), 2025-02-28
Supplement: Supplementary file 2 [file 643021df97d0c348245135d3.xlsx]

## Sheet: Score form
Child-ID	0000	Score form PERF-FIT
Name:				Date of birth:
Address:				Test date:
School:				Age:
Examined by:				Sex:
Reason for referral:				By:
Item													Best or Total Score	Item Scale Score
Running time (s)		Trial1			Trial2				Extra Trial								#VALUE!	#VALUE!	#VALUE!
Running Mistakes (#)		Trial1			Trial2				Extra Trial					#N/A		LadderRunScale
Stepping time (s)		Trial1			Trial2				Extra Trial								#VALUE!	#VALUE!	#VALUE!
Stepping Mistakes (#)		Trial1			Trial2				Extra Trial					#N/A		LadderStepsScale
Side jump (#)		Trial1							Trial2					#N/A		SideJumpScale
Long jump (cm)		Trial1							Trial2					#N/A		LongJumpScale
Overhead throw (cm)		Trial1							Trial2					#N/A		OverhandthrowScale
Total Score Agility and Power		Percentile			#N/A				Total Scale Score				#N/A	#N/A		TotalAgilityScale1
10 balls per item		Two hands		Pref hand		Non-Pref			PH clap		NPH clap
Bouncing (max 50)													0	#N/A		BounceScale
Throwing (max 50)													0	#N/A		ThrowScale
Static Balance Hug Right (Max 15)			Trial1						Trial2				Trial2			GO
Static Balance Hug Left (Max 15)			Trial1						Trial2				Trial2			GO
Static Balance Foot Right (Max 15)			Trial1						Trial2				Trial2			GO	GO
Static Balance Foot Left (Max 15)			Trial1						Trial2				Trial2			GO	GO
Total Static Balance (Max 60 s)			Static Hug R + L + Static Toe R + L										0	#N/A		StaticBalanceScale
Dynamic Balance Hug (Max 8)			Trial1						Trial2				Trial2
Dynamic Balance Foot (Max 8)			Trial1						Trial2				Trial2
Cans R (Max 8) Not able to stand 3 sec on R enter 0			Close						Far				0
Cans L (Max 8) Not able to stand 3 sec on L enter 0			Close						Far				0
Total Dynamic Balance (Max 32 points)			Dynamic Hug + Toe + Cans close + Cans far										0	#N/A		DynamicBalanceScale
Jump Hop		Every square			Every other			5 cm			10cm
Jump Trial1													0			NOGO	NOGO	NOGO
Jump Trial2
Hop Right Trial 1													0			NOGO	NOGO	NOGO
Hop Right Trial 2
Hop Left Trial 1													0			NOGO	NOGO	NOGO
Hop Left Trial 2
Total Jump Hop (max 60 points)		Jump + Hop right + Hop left											0	#N/A		TotalJumpHopScale
Total Score Performance		Percentile			#N/A				Total Scale Score				#N/A	#N/A		TotalSKillsScale1
Total Score PERF-FIT		Percentile			#N/A				Total Scale Score				#N/A	#N/A		TotalPERFFITSCale1
Summary of test observations
Actions

## Sheet: List
Child-ID	Ready	Gender	Age	LadderRunningTime1	LadderRunningMistakes1	LadderRunningTime2	LadderRunningMistakes2	LadderRunningTimeExtra	LadderRunningMistakesExtra	RunningBest	RunningScale	LadderSteppingTime1	LadderSteppingMistakes1	LadderSteppingTime2	LadderSteppingMistakes2	LadderSteppingTimeExtra	LadderSteppingMistakesExtra	SteppingBest	SteppingScale	SideJump1	SideJump2	SidejumpBest	SidejumpScale	Longjump1	Longjump2	LongjumpBest	LongjumpScale	Overheadthrow1	Overheadthrow2	OverheadthrowBest	OverheadScale	BallBounce1	BallBounce2	BallBounce3	BallBounce4	BallBounce5	BounceTotal	BounceScale	BallThrow1	BallThrow2	BallThrow3	BallThrow4	BallThrow5	ThrowTotal	ThrowScale	KneeStaticR1	KneeStaticR2	KneeStaticL1	KneeStaticL2
0001
0002
0003
0004
0005
0006
0007
0008
0009
0010
0011
0012
0013
0014
0015
0016
0017
0018
0019
0020
0021
0022
0023
0024
0025
0026
0027
0028
0029
0030
0031
0032
0033
0034
0035
0036
0037
0038
0039
0040
0041
0042
0043
0044
0045
0046
0047
0048
0049
0050
0051
0052
0053
0054
0055
0056
0057
0058
0059
0060
0061
0062
0063
0064
0065
0066
0067
0068
0069
0070
0071
0072
0073
0074
0075
0076
0077
0078
0079
0080
0081
0082
0083
0084
0085
0086
0087
0088
0089
0090
0091
0092
0093
0094
0095
0096
0097
0098
0099
0100
0101
0102
0103
0104
0105
0106
0107
0108
0109
0110
0111
0112
0113
0114
0115
0116
0117
0118
0119
0120
0121
0122
0123
0124
0125
0126
0127
0128
0129
0130
0131
0132
0133
0134
0135
0136
0137
0138
0139
0140
0141
0142
0143
0144
0145
0146
0147
0148
0149
0150
0151
0152
0153
0154
0155
0156
0157
0158
0159
0160
0161
0162
0163
0164
0165
0166
0167
0168
0169
0170
0171
0172
0173
0174
0175
0176
0177
0178
0179
0180
0181
0182
0183
0184
0185
0186
0187
0188
0189
0190
0191
0192
0193
0194
0195
0196
0197
0198
0199
0200
0201
0202
0203
0204
0205
0206
0207
0208
0209
0210
0211
0212
0213
0214
0215
0216
0217
0218
0219
0220
0221
0222
0223
0224
0225
0226
0227
0228
0229
0230
0231
0232
0233
0234
0235
0236
0237
0238
0239
0240
0241
0242
0243
0244
0245
0246
0247
0248
0249
0250
0251
0252
0253
0254
0255
0256
0257
0258
0259
0260
0261
0262
0263
0264
0265
0266
0267
0268
0269
0270
0271
0272
0273
0274
0275
0276
0277
0278
0279
0280
0281
0282
0283
0284
0285
0286
0287
0288
0289
0290
0291
0292
0293
0294
0295
0296
0297
0298
0299
0300
0301
0302
0303
0304
0305
0306
0307
0308
0309
0310
0311
0312
0313
0314
0315
0316
0317
0318
0319
0320
0321
0322
0323
0324
0325
0326
0327
0328
0329
0330
0331
0332
0333
0334
0335
0336
0337
0338
0339
0340
0341
0342
0343
0344
0345
0346
0347
0348
0349
0350
0351
0352
0353
0354
0355
0356
0357
0358
0359
0360
0361
0362
0363
0364
0365
0366
0367
0368
0369
0370
0371
0372
0373
0374
0375
0376
0377
0378
0379
0380
0381
0382
0383
0384
0385
0386
0387
0388
0389
0390
0391
0392
0393
0394
0395
0396
0397
0398
0399
0400
0401
0402
0403
0404
0405
0406
0407
0408
0409
0410
0411
0412
0413
0414
0415
0416
0417
0418
0419
0420
0421
0422
0423
0424
0425
0426
0427
0428
0429
0430
0431
0432
0433
0434
0435
0436
0437
0438
0439
0440
0441
0442
0443
0444
0445
0446
0447
0448
0449
0450
0451
0452
0453
0454
0455
0456
0457
0458
0459
0460
0461
0462
0463
0464
0465
0466
0467
0468
0469
0470
0471
0472
0473
0474
0475
0476
0477
0478
0479
0480
0481
0482
0483
0484
0485
0486
0487
0488
0489
0490
0491
0492
0493
0494
0495
0496
0497
0498
0499
0500
0501
0502
0503
0504
0505
0506
0507
0508
0509
0510
0511
0512
0513
0514
0515
0516
0517
0518
0519
0520
0521
0522
0523
0524
0525
0526
0527
0528
0529
0530
0531
0532
0533
0534
0535
0536
0537
0538
0539
0540
0541
0542
0543
0544
0545
0546
0547
0548
0549
0550
0551
0552
0553
0554
0555
0556
0557
0558
0559
0560
0561
0562
0563
0564
0565
0566
0567
0568
0569
0570
0571
0572
0573
0574
0575
0576
0577
0578
0579
0580
0581
0582
0583
0584
0585
0586
0587
0588
0589
0590
0591
0592
0593
0594
0595
0596
0597
0598
0599
0600
0601
0602
0603
0604
0605
0606
0607
0608
0609
0610
0611
0612
0613
0614
0615
0616
0617
0618
0619
0620
0621
0622
0623
0624
0625
0626
0627
0628
0629
0630
0631
0632
0633
0634
0635
0636
0637
0638
0639
0640
0641
0642
0643
0644
0645
0646
0647
0648
0649
0650
0651
0652
0653
0654
0655
0656
0657
0658
0659
0660
0661
0662
0663
0664
0665
0666
0667
0668
0669
0670
0671
0672
0673
0674
0675
0676
0677
0678
0679
0680
0681
0682
0683
0684
0685
0686
0687
0688
0689
0690
0691
0692
0693
0694
0695
0696
0697
0698
0699
0700
0701
0702
0703
0704
0705
0706
0707
0708
0709
0710
0711
0712
0713
0714
0715
0716
0717
0718
0719
0720
0721
0722
0723
0724
0725
0726
0727
0728
0729
0730
0731
0732
0733
0734
0735
0736
0737
0738
0739
0740
0741
0742
0743
0744
0745
0746
0747
0748
0749
0750
0751
0752
0753
0754
0755
0756
0757
0758
0759
0760
0761
0762
0763
0764
0765
0766
0767
0768
0769
0770
0771
0772
0773
0774
0775
0776
0777
0778
0779
0780
0781
0782
0783
0784
0785
0786
0787
0788
0789
0790
0791
0792
0793
0794
0795
0796
0797
0798
0799
0800
0801
0802
0803
0804
0805
0806
0807
0808
0809
0810
0811
0812
0813
0814
0815
0816
0817
0818
0819
0820
0821
0822
0823
0824
0825
0826
0827
0828
0829
0830
0831
0832
0833
0834
0835
0836
0837
0838
0839
0840
0841
0842
0843
0844
0845
0846
0847
0848
0849
0850
0851
0852
0853
0854
0855
0856
0857
0858
0859
0860
0861
0862
0863
0864
0865
0866
0867
0868
0869
0870
0871
0872
0873
0874
0875
0876
0877
0878
0879
0880
0881
0882
0883
0884
0885
0886
0887
0888
0889
0890
0891
0892
0893
0894
0895
0896
0897
0898
0899
0900
0901
0902
0903
0904
0905
0906
0907
0908
0909
0910
0911
0912
0913
0914
0915
0916
0917
0918
0919
0920
0921
0922
0923
0924
0925
0926
0927
0928
0929
0930
0931
0932
0933
0934
0935
0936
0937
0938
0939
0940
0941
0942
0943
0944
0945
0946
0947
0948
0949
0950
0951
0952
0953
0954
0955
0956
0957
0958
0959
0960
0961
0962
0963
0964
0965
0966
0967
0968
0969
0970
0971
0972
0973
0974
0975
0976
0977
0978
0979
0980
0981
0982
0983
0984
0985
0986
0987
0988
0989
0990
0991
0992
0993
0994
0995
0996
0997
0998
0999
1000
1001
1002
1003
1004
1005
1006
1007
1008
1009
1010
1011
1012
1013
1014
1015
1016
1017
1018
1019
1020
1021
1022
1023
1024
1025
1026
1027
1028
1029
1030
1031
1032
1033
1034
1035
1036
1037
1038
1039
1040
1041
1042
1043
1044
1045
1046
1047
1048
1049
1050
1051
1052
1053
1054
1055
1056
1057
1058
1059
1060
1061
1062
1063
1064
1065
1066
1067
1068
1069
1070
1071
1072
1073
1074
1075
1076
1077
1078
1079
1080
1081
1082
1083
1084
1085
1086
1087
1088
1089
1090
1091
1092
1093
1094
1095
1096
1097
1098
1099
1100
1101
1102
1103
1104
1105
1106
1107
1108
1109
1110
1111
1112
1113
1114
1115
1116
1117
1118
1119
1120
1121
1122
1123
1124
1125
1126
1127
1128
1129
1130
1131
1132
1133
1134
1135
1136
1137
1138
1139
1140
1141
1142
1143
1144
1145
1146
1147
1148
1149
1150
1151
1152
1153
1154
1155
1156
1157
1158
1159
1160
1161
1162
1163
1164
1165
1166
1167
1168
1169
1170
1171
1172
1173
1174
1175
1176
1177
1178
1179
1180
1181
1182
1183
1184
1185
1186
1187
1188
1189
1190
1191
1192
1193
1194
1195
1196
1197
1198
1199
1200
1201
1202
1203
1204
1205
1206
1207
1208
1209
1210
1211
1212
1213
1214
1215
1216
1217
1218
1219
1220
1221
1222
1223
1224
1225
1226
1227
1228
1229
1230
1231
1232
1233
1234
1235
1236
1237
1238
1239
1240
1241
1242
1243
1244
1245
1246
1247
1248
1249
1250
1251
1252
1253
1254
1255
1256
1257
1258
1259
1260
1261
1262
1263
1264
1265
1266
1267
1268
1269
1270
1271
1272
1273
1274
1275
1276
1277
1278
1279
1280
1281
1282
1283
1284
1285
1286
1287
1288
1289
1290
1291
1292
1293
1294
1295
1296
1297
1298
1299
1300
1301
1302
1303
1304
1305
1306
1307
1308
1309
1310
1311
1312
1313
1314
1315
1316
1317
1318
1319
1320
1321
1322
1323
1324
1325
1326
1327
1328
1329
1330
1331
1332
1333
1334
1335
1336
1337
1338
1339
1340
1341
1342
1343
1344
1345
1346
1347
1348
1349
1350
1351
1352
1353
1354
1355
1356
1357
1358
1359
1360
1361
1362
1363
1364
1365
1366
1367
1368
1369
1370
1371
1372
1373
1374
1375
1376
1377
1378
1379
1380
1381
1382
1383
1384
1385
1386
1387
1388
1389
1390
1391
1392
1393
1394
1395
1396
1397
1398
1399
1400
1401
1402
1403
1404
1405
1406
1407
1408
1409
1410
1411
1412
1413
1414
1415
1416
1417
1418
1419
1420
1421
1422
1423
1424
1425
1426
1427
1428
1429
1430
1431
1432
1433
1434
1435
1436
1437
1438
1439
1440
1441
1442
1443
1444
1445
1446
1447
1448
1449
1450
1451
1452
1453
1454
1455
1456
1457
1458
1459
1460
1461
1462
1463
1464
1465
1466
1467
1468
1469
1470
1471
1472
1473
1474
1475
1476
1477
1478
1479
1480
1481
1482
1483
1484
1485
1486
1487
1488
1489
1490
1491
1492
1493
1494
1495
1496
1497
1498
1499
1500
1501
1502
1503
1504
1505
1506
1507
1508
1509
1510
1511
1512
1513
1514
1515
1516
1517
1518
1519
1520
1521
1522
1523
1524
1525
1526
1527
1528
1529
1530
1531
1532
1533
1534
1535
1536
1537
1538
1539
1540
1541
1542
1543
1544
1545
1546
1547
1548
1549
1550
1551
1552
1553
1554
1555
1556
1557
1558
1559
1560
1561
1562
1563
1564
1565
1566
1567
1568
1569
1570
1571
1572
1573
1574
1575
1576
1577
1578
1579
1580
1581
1582
1583
1584
1585
1586
1587
1588
1589
1590
1591
1592
1593
1594
1595
1596
1597
1598
1599
1600
1601
1602
1603
1604
1605
1606
1607
1608
1609
1610
1611
1612
1613
1614
1615
1616
1617
1618
1619
1620
1621
1622
1623
1624
1625
1626
1627
1628
1629
1630
1631
1632
1633
1634
1635
1636
1637
1638
1639
1640
1641
1642
1643
1644
1645
1646
1647
1648
1649
1650
1651
1652
1653
1654
1655
1656
1657
1658
1659
1660
1661
1662
1663
1664
1665
1666
1667
1668
1669
1670
1671
1672
1673
1674
1675
1676
1677
1678
1679
1680
1681
1682
1683
1684
1685
1686
1687
1688
1689
1690
1691
1692
1693
1694
1695
1696
1697
1698
1699
1700
1701
1702
1703
1704
1705
1706
1707
1708
1709
1710
1711
1712
1713
1714
1715
1716
1717
1718
1719
1720
1721
1722
1723
1724
1725
1726
1727
1728
1729
1730
1731
1732
1733
1734
1735
1736
1737
1738
1739
1740
1741
1742
1743
1744
1745
1746
1747
1748
1749
1750
1751
1752
1753
1754
1755
1756
1757
1758
1759
1760
1761
1762
1763
1764
1765
1766
1767
1768
1769
1770
1771
1772
1773
1774
1775
1776
1777
1778
1779
1780
1781
1782
1783
1784
1785
1786
1787
1788
1789
1790
1791
1792
1793
1794
1795
1796
1797
1798
1799
1800
1801
1802
1803
1804
1805
1806
1807
1808
1809
1810
1811
1812
1813
1814
1815
1816
1817
1818
1819
1820
1821
1822
1823
1824
1825
1826
1827
1828
1829
1830
1831
1832
1833
1834
1835
1836
1837
1838
1839
1840
1841
1842
1843
1844
1845
1846
1847
1848
1849
1850
1851
1852
1853
1854
1855
1856
1857
1858
1859
1860
1861
1862
1863
1864
1865
1866
1867
1868
1869
1870
1871
1872
1873
1874
1875
1876
1877
1878
1879
1880
1881
1882
1883
1884
1885
1886
1887
1888
1889
1890
1891
1892
1893
1894
1895
1896
1897
1898
1899
1900
1901
1902
1903
1904
1905
1906
1907
1908
1909
1910
1911
1912
1913
1914
1915
1916
1917
1918
1919
1920
1921
1922
1923
1924
1925
1926
1927
1928
1929
1930
1931
1932
1933
1934
1935
1936
1937
1938
1939
1940
1941
1942
1943
1944
1945
1946
1947
1948
1949
1950
1951
1952
1953
1954
1955
1956
1957
1958
1959
1960
1961
1962
1963
1964
1965
1966
1967
1968
1969
1970
1971
1972
1973
1974
1975
1976
1977
1978
1979
1980
1981
1982
1983
1984
1985
1986
1987
1988
1989
1990
1991
1992
1993
1994
1995
1996
1997
1998
1999
[truncated: 8,000 more rows]
[truncated: 50 more columns]

## Sheet: Sheet1
Searchcriterium	Searchplus	Total_Score_min	Total_Score_max	Scale score			Scaled	Percentile
BounceScaleBoy06	BounceScaleBoy60	0	5	4			19	99.9
BounceScaleBoy06	BounceScaleBoy66	6	8	5			18	99.6
BounceScaleBoy06	BounceScaleBoy69	9	11	6			17	99.1
BounceScaleBoy06	BounceScaleBoy612	12	17	7			16	97.7
BounceScaleBoy06	BounceScaleBoy618	18	21	8			15	95
BounceScaleBoy06	BounceScaleBoy622	22	24	9			14	91.2
BounceScaleBoy06	BounceScaleBoy625	25	30	10			13	84.1
BounceScaleBoy06	BounceScaleBoy631	31	33	11			12	74.2
BounceScaleBoy06	BounceScaleBoy634	34	36	12			11	63.7
BounceScaleBoy06	BounceScaleBoy637	37	42	13			10	50
BounceScaleBoy06	BounceScaleBoy643	43	44	14			9	36.3
BounceScaleBoy06	BounceScaleBoy645	45	48	15			8	25.8
BounceScaleBoy06	BounceScaleBoy649	49	50	16			7	15.9
BounceScaleBoy07	BounceScaleBoy70	0	2	3			6	8.8
BounceScaleBoy07	BounceScaleBoy73	3	7	4			5	5
BounceScaleBoy07	BounceScaleBoy78	8	11	5			4	2.3
BounceScaleBoy07	BounceScaleBoy712	12	15	6			3	0.9
BounceScaleBoy07	BounceScaleBoy716	16	21	7			2	0.4
BounceScaleBoy07	BounceScaleBoy722	22	24	8			1	0.1
BounceScaleBoy07	BounceScaleBoy725	25	28	9
BounceScaleBoy07	BounceScaleBoy729	29	34	10
BounceScaleBoy07	BounceScaleBoy735	35	38	11
BounceScaleBoy07	BounceScaleBoy739	39	41	12
BounceScaleBoy07	BounceScaleBoy742	42	47	13
BounceScaleBoy07	BounceScaleBoy748	48	50	14
BounceScaleBoy08	BounceScaleBoy80	0	9	1
BounceScaleBoy08	BounceScaleBoy810	10	11	2
BounceScaleBoy08	BounceScaleBoy812	12	15	3
BounceScaleBoy08	BounceScaleBoy816	16	20	4
BounceScaleBoy08	BounceScaleBoy821	21	23	5
BounceScaleBoy08	BounceScaleBoy824	24	25	6
BounceScaleBoy08	BounceScaleBoy826	26	31	7
BounceScaleBoy08	BounceScaleBoy832	32	33	8
BounceScaleBoy08	BounceScaleBoy834	34	36	9
BounceScaleBoy08	BounceScaleBoy837	37	41	10
BounceScaleBoy08	BounceScaleBoy842	42	44	11
BounceScaleBoy08	BounceScaleBoy845	45	46	12
BounceScaleBoy08	BounceScaleBoy847	47	50	13
BounceScaleBoy09	BounceScaleBoy90	0	14	1
BounceScaleBoy09	BounceScaleBoy915	15	19	3
BounceScaleBoy09	BounceScaleBoy920	20	25	4
BounceScaleBoy09	BounceScaleBoy926	26	27	5
BounceScaleBoy09	BounceScaleBoy928	28	30	6
BounceScaleBoy09	BounceScaleBoy931	31	34	7
BounceScaleBoy09	BounceScaleBoy935	35	36	8
BounceScaleBoy09	BounceScaleBoy937	37	39	9
BounceScaleBoy09	BounceScaleBoy940	40	44	10
BounceScaleBoy09	BounceScaleBoy945	45	46	11
BounceScaleBoy09	BounceScaleBoy947	47	48	12
BounceScaleBoy09	BounceScaleBoy949	49	50	13
BounceScaleBoy10	BounceScaleBoy100	0	23	1
BounceScaleBoy10	BounceScaleBoy1024	24	28	3
BounceScaleBoy10	BounceScaleBoy1029	29	30	4
BounceScaleBoy10	BounceScaleBoy1031	31	33	5
BounceScaleBoy10	BounceScaleBoy1034	34	35	6
BounceScaleBoy10	BounceScaleBoy1036	36	39	7
BounceScaleBoy10	BounceScaleBoy1040	40		8
BounceScaleBoy10	BounceScaleBoy1041	41	42	9
BounceScaleBoy10	BounceScaleBoy1043	43	46	10
BounceScaleBoy10	BounceScaleBoy1047	47	48	11
BounceScaleBoy10	BounceScaleBoy1049	49		12
BounceScaleBoy10	BounceScaleBoy1050	50		13
BounceScaleBoy11	BounceScaleBoy110	0	29	1
BounceScaleBoy11	BounceScaleBoy1130	30	34	2
BounceScaleBoy11	BounceScaleBoy1135	35	39	5
BounceScaleBoy11	BounceScaleBoy1140	40	43	7
BounceScaleBoy11	BounceScaleBoy1144	44		8
BounceScaleBoy11	BounceScaleBoy1145	45		9
BounceScaleBoy11	BounceScaleBoy1146	46	48	10
BounceScaleBoy11	BounceScaleBoy1149	49		11
BounceScaleBoy11	BounceScaleBoy1150	50		12
BounceScaleBoy12	BounceScaleBoy120	0	14	1
BounceScaleBoy12	BounceScaleBoy1215	15	40	5
BounceScaleBoy12	BounceScaleBoy1241	41	44	7
BounceScaleBoy12	BounceScaleBoy1245	45		8
BounceScaleBoy12	BounceScaleBoy1246	46		9
BounceScaleBoy12	BounceScaleBoy1247	47	48	10
BounceScaleBoy12	BounceScaleBoy1249	49		11
BounceScaleBoy12	BounceScaleBoy1250	50		12
BounceScaleGirl06	BounceScaleGirl60	0		5
BounceScaleGirl06	BounceScaleGirl61	1	3	6
BounceScaleGirl06	BounceScaleGirl64	4	11	7
BounceScaleGirl06	BounceScaleGirl612	12	15	8
BounceScaleGirl06	BounceScaleGirl616	16	18	9
BounceScaleGirl06	BounceScaleGirl619	19	26	10
BounceScaleGirl06	BounceScaleGirl627	27	30	11
BounceScaleGirl06	BounceScaleGirl631	31	33	12
BounceScaleGirl06	BounceScaleGirl634	34	40	13
BounceScaleGirl06	BounceScaleGirl641	41	44	14
BounceScaleGirl06	BounceScaleGirl645	45	47	15
BounceScaleGirl06	BounceScaleGirl648	48	50	16
BounceScaleGirl07	BounceScaleGirl70	0	5	4
BounceScaleGirl07	BounceScaleGirl76	6	9	5
BounceScaleGirl07	BounceScaleGirl710	10	12	6
BounceScaleGirl07	BounceScaleGirl713	13	19	7
BounceScaleGirl07	BounceScaleGirl720	20	22	8
BounceScaleGirl07	BounceScaleGirl723	23	25	9
BounceScaleGirl07	BounceScaleGirl726	26	32	10
BounceScaleGirl07	BounceScaleGirl733	33	36	11
BounceScaleGirl07	BounceScaleGirl737	37	39	12
BounceScaleGirl07	BounceScaleGirl740	40	45	13
BounceScaleGirl07	BounceScaleGirl746	46	49	14
BounceScaleGirl07	BounceScaleGirl750	50		15
BounceScaleGirl08	BounceScaleGirl80	0	4	1
BounceScaleGirl08	BounceScaleGirl85	5	7	2
BounceScaleGirl08	BounceScaleGirl88	8	9	3
BounceScaleGirl08	BounceScaleGirl810	10	15	4
BounceScaleGirl08	BounceScaleGirl816	16	18	5
BounceScaleGirl08	BounceScaleGirl819	19	20	6
BounceScaleGirl08	BounceScaleGirl821	21	26	7
BounceScaleGirl08	BounceScaleGirl827	27	29	8
BounceScaleGirl08	BounceScaleGirl830	30	32	9
BounceScaleGirl08	BounceScaleGirl833	33	37	10
BounceScaleGirl08	BounceScaleGirl838	38	41	11
BounceScaleGirl08	BounceScaleGirl842	42	43	12
BounceScaleGirl08	BounceScaleGirl844	44	48	13
BounceScaleGirl08	BounceScaleGirl849	49	50	14
BounceScaleGirl09	BounceScaleGirl90	0	14	1
BounceScaleGirl09	BounceScaleGirl915	15	18	3
BounceScaleGirl09	BounceScaleGirl919	19	23	4
BounceScaleGirl09	BounceScaleGirl924	24	25	5
BounceScaleGirl09	BounceScaleGirl926	26	28	6
BounceScaleGirl09	BounceScaleGirl929	29	33	7
BounceScaleGirl09	BounceScaleGirl934	34	35	8
BounceScaleGirl09	BounceScaleGirl936	36	37	9
BounceScaleGirl09	BounceScaleGirl938	38	42	10
BounceScaleGirl09	BounceScaleGirl943	43	45	11
BounceScaleGirl09	BounceScaleGirl946	46	47	12
BounceScaleGirl09	BounceScaleGirl948	48	50	13
BounceScaleGirl10	BounceScaleGirl100	0	15	1
BounceScaleGirl10	BounceScaleGirl1016	16	19	2
BounceScaleGirl10	BounceScaleGirl1020	20	25	4
BounceScaleGirl10	BounceScaleGirl1026	26	28	5
BounceScaleGirl10	BounceScaleGirl1029	29	30	6
BounceScaleGirl10	BounceScaleGirl1031	31	35	7
BounceScaleGirl10	BounceScaleGirl1036	36	40	9
BounceScaleGirl10	BounceScaleGirl1041	41	44	10
BounceScaleGirl10	BounceScaleGirl1045	45	47	11
BounceScaleGirl10	BounceScaleGirl1048	48	49	12
BounceScaleGirl10	BounceScaleGirl1050	50		13
BounceScaleGirl11	BounceScaleGirl110	0	20	1
BounceScaleGirl11	BounceScaleGirl1121	21	24	2
BounceScaleGirl11	BounceScaleGirl1125	25	32	5
BounceScaleGirl11	BounceScaleGirl1133	33	38	7
BounceScaleGirl11	BounceScaleGirl1139	39	40	8
BounceScaleGirl11	BounceScaleGirl1141	41	42	9
BounceScaleGirl11	BounceScaleGirl1143	43	46	10
BounceScaleGirl11	BounceScaleGirl1147	47	48	11
BounceScaleGirl11	BounceScaleGirl1149	49	50	12
BounceScaleGirl12	BounceScaleGirl120	0	26	1
BounceScaleGirl12	BounceScaleGirl1227	27	30	2
BounceScaleGirl12	BounceScaleGirl1231	31		3
BounceScaleGirl12	BounceScaleGirl1232	32	36	5
BounceScaleGirl12	BounceScaleGirl1237	37	38	6
BounceScaleGirl12	BounceScaleGirl1239	39		7
BounceScaleGirl12	BounceScaleGirl1240	40	42	8
BounceScaleGirl12	BounceScaleGirl1243	43	44	9
BounceScaleGirl12	BounceScaleGirl1245	45	47	10
BounceScaleGirl12	BounceScaleGirl1248	48		11
BounceScaleGirl12	BounceScaleGirl1249	49	50	12
DynamicBalanceScaleBoy06	DynamicBalanceScaleBoy60	0	8	4
DynamicBalanceScaleBoy06	DynamicBalanceScaleBoy69	9	10	5
DynamicBalanceScaleBoy06	DynamicBalanceScaleBoy611	11	12	6
DynamicBalanceScaleBoy06	DynamicBalanceScaleBoy613	13	15	7
DynamicBalanceScaleBoy06	DynamicBalanceScaleBoy616	16	17	8
DynamicBalanceScaleBoy06	DynamicBalanceScaleBoy618	18	19	9
DynamicBalanceScaleBoy06	DynamicBalanceScaleBoy620	20	22	10
DynamicBalanceScaleBoy06	DynamicBalanceScaleBoy623	23	24	11
DynamicBalanceScaleBoy06	DynamicBalanceScaleBoy625	25		12
DynamicBalanceScaleBoy06	DynamicBalanceScaleBoy626	26	29	13
DynamicBalanceScaleBoy06	DynamicBalanceScaleBoy630	30		14
DynamicBalanceScaleBoy06	DynamicBalanceScaleBoy631	31	32	15
DynamicBalanceScaleBoy07	DynamicBalanceScaleBoy70	0	6	1
DynamicBalanceScaleBoy07	DynamicBalanceScaleBoy77	7	10	3
DynamicBalanceScaleBoy07	DynamicBalanceScaleBoy711	11	13	4
DynamicBalanceScaleBoy07	DynamicBalanceScaleBoy714	14	15	5
DynamicBalanceScaleBoy07	DynamicBalanceScaleBoy716	16		6
DynamicBalanceScaleBoy07	DynamicBalanceScaleBoy717	17	19	7
DynamicBalanceScaleBoy07	DynamicBalanceScaleBoy720	20	21	8
DynamicBalanceScaleBoy07	DynamicBalanceScaleBoy722	22		9
DynamicBalanceScaleBoy07	DynamicBalanceScaleBoy723	23	26	10
DynamicBalanceScaleBoy07	DynamicBalanceScaleBoy727	27		11
DynamicBalanceScaleBoy07	DynamicBalanceScaleBoy728	28	29	12
DynamicBalanceScaleBoy07	DynamicBalanceScaleBoy730	30	32	13
DynamicBalanceScaleBoy08	DynamicBalanceScaleBoy80	0	12	1
DynamicBalanceScaleBoy08	DynamicBalanceScaleBoy813	13	17	4
DynamicBalanceScaleBoy08	DynamicBalanceScaleBoy818	18		5
DynamicBalanceScaleBoy08	DynamicBalanceScaleBoy819	19		6
DynamicBalanceScaleBoy08	DynamicBalanceScaleBoy820	20	22	7
DynamicBalanceScaleBoy08	DynamicBalanceScaleBoy823	23		8
DynamicBalanceScaleBoy08	DynamicBalanceScaleBoy824	24	25	9
DynamicBalanceScaleBoy08	DynamicBalanceScaleBoy826	26	27	10
DynamicBalanceScaleBoy08	DynamicBalanceScaleBoy828	28	29	11
DynamicBalanceScaleBoy08	DynamicBalanceScaleBoy830	30		12
DynamicBalanceScaleBoy08	DynamicBalanceScaleBoy831	31	32	13
DynamicBalanceScaleBoy09	DynamicBalanceScaleBoy90	0	14	1
DynamicBalanceScaleBoy09	DynamicBalanceScaleBoy915	15	16	3
DynamicBalanceScaleBoy09	DynamicBalanceScaleBoy917	17	18	4
DynamicBalanceScaleBoy09	DynamicBalanceScaleBoy919	19	20	5
DynamicBalanceScaleBoy09	DynamicBalanceScaleBoy921	21		6
DynamicBalanceScaleBoy09	DynamicBalanceScaleBoy922	22	23	7
DynamicBalanceScaleBoy09	DynamicBalanceScaleBoy924	24		8
DynamicBalanceScaleBoy09	DynamicBalanceScaleBoy925	25		9
DynamicBalanceScaleBoy09	DynamicBalanceScaleBoy926	26	28	10
DynamicBalanceScaleBoy09	DynamicBalanceScaleBoy929	29		11
DynamicBalanceScaleBoy09	DynamicBalanceScaleBoy930	30		12
DynamicBalanceScaleBoy09	DynamicBalanceScaleBoy931	31	32	13
DynamicBalanceScaleBoy10	DynamicBalanceScaleBoy100	0	16	1
DynamicBalanceScaleBoy10	DynamicBalanceScaleBoy1017	17	18	2
DynamicBalanceScaleBoy10	DynamicBalanceScaleBoy1019	19		3
DynamicBalanceScaleBoy10	DynamicBalanceScaleBoy1020	20	21	4
DynamicBalanceScaleBoy10	DynamicBalanceScaleBoy1022	22		5
DynamicBalanceScaleBoy10	DynamicBalanceScaleBoy1023	23		6
DynamicBalanceScaleBoy10	DynamicBalanceScaleBoy1024	24	25	7
DynamicBalanceScaleBoy10	DynamicBalanceScaleBoy1026	26		8
DynamicBalanceScaleBoy10	DynamicBalanceScaleBoy1027	27		9
DynamicBalanceScaleBoy10	DynamicBalanceScaleBoy1028	28	29	10
DynamicBalanceScaleBoy10	DynamicBalanceScaleBoy1030	30		11
DynamicBalanceScaleBoy10	DynamicBalanceScaleBoy1031	31		12
DynamicBalanceScaleBoy10	DynamicBalanceScaleBoy1032	32		13
DynamicBalanceScaleBoy11	DynamicBalanceScaleBoy110	0	20	1
DynamicBalanceScaleBoy11	DynamicBalanceScaleBoy1121	21		2
DynamicBalanceScaleBoy11	DynamicBalanceScaleBoy1122	22	23	4
DynamicBalanceScaleBoy11	DynamicBalanceScaleBoy1124	24		5
DynamicBalanceScaleBoy11	DynamicBalanceScaleBoy1125	25		6
DynamicBalanceScaleBoy11	DynamicBalanceScaleBoy1126	26	27	7
DynamicBalanceScaleBoy11	DynamicBalanceScaleBoy1128	28		8
DynamicBalanceScaleBoy11	DynamicBalanceScaleBoy1129	29	30	9
DynamicBalanceScaleBoy11	DynamicBalanceScaleBoy1131	31		10
DynamicBalanceScaleBoy11	DynamicBalanceScaleBoy1132	32		11
DynamicBalanceScaleBoy12	DynamicBalanceScaleBoy120	0	10	1
DynamicBalanceScaleBoy12	DynamicBalanceScaleBoy1211	11	21	3
DynamicBalanceScaleBoy12	DynamicBalanceScaleBoy1222	22		4
DynamicBalanceScaleBoy12	DynamicBalanceScaleBoy1223	23	24	5
DynamicBalanceScaleBoy12	DynamicBalanceScaleBoy1225	25	26	7
DynamicBalanceScaleBoy12	DynamicBalanceScaleBoy1227	27		8
DynamicBalanceScaleBoy12	DynamicBalanceScaleBoy1228	28		9
DynamicBalanceScaleBoy12	DynamicBalanceScaleBoy1229	29	30	10
DynamicBalanceScaleBoy12	DynamicBalanceScaleBoy1231	31		11
DynamicBalanceScaleBoy12	DynamicBalanceScaleBoy1232	32		13
DynamicBalanceScaleGirl06	DynamicBalanceScaleGirl60	0	4	1
DynamicBalanceScaleGirl06	DynamicBalanceScaleGirl65	5	11	4
DynamicBalanceScaleGirl06	DynamicBalanceScaleGirl612	12	13	5
DynamicBalanceScaleGirl06	DynamicBalanceScaleGirl614	14		6
DynamicBalanceScaleGirl06	DynamicBalanceScaleGirl615	15	17	7
DynamicBalanceScaleGirl06	DynamicBalanceScaleGirl618	18	19	8
DynamicBalanceScaleGirl06	DynamicBalanceScaleGirl620	20		9
DynamicBalanceScaleGirl06	DynamicBalanceScaleGirl621	21	23	10
DynamicBalanceScaleGirl06	DynamicBalanceScaleGirl624	24	25	11
DynamicBalanceScaleGirl06	DynamicBalanceScaleGirl626	26		12
DynamicBalanceScaleGirl06	DynamicBalanceScaleGirl627	27	29	13
DynamicBalanceScaleGirl06	DynamicBalanceScaleGirl630	30	31	14
DynamicBalanceScaleGirl06	DynamicBalanceScaleGirl632	32		15
DynamicBalanceScaleGirl07	DynamicBalanceScaleGirl70	0	7	1
DynamicBalanceScaleGirl07	DynamicBalanceScaleGirl78	8	15	4
DynamicBalanceScaleGirl07	DynamicBalanceScaleGirl716	16	17	5
DynamicBalanceScaleGirl07	DynamicBalanceScaleGirl718	18		6
DynamicBalanceScaleGirl07	DynamicBalanceScaleGirl719	19	21	7
DynamicBalanceScaleGirl07	DynamicBalanceScaleGirl722	22		8
DynamicBalanceScaleGirl07	DynamicBalanceScaleGirl723	23	24	9
DynamicBalanceScaleGirl07	DynamicBalanceScaleGirl725	25	27	10
DynamicBalanceScaleGirl07	DynamicBalanceScaleGirl728	28		11
DynamicBalanceScaleGirl07	DynamicBalanceScaleGirl729	29		12
DynamicBalanceScaleGirl07	DynamicBalanceScaleGirl730	30	32	13
DynamicBalanceScaleGirl08	DynamicBalanceScaleGirl80	0	14	1
DynamicBalanceScaleGirl08	DynamicBalanceScaleGirl815	15	16	2
DynamicBalanceScaleGirl08	DynamicBalanceScaleGirl817	17		3
DynamicBalanceScaleGirl08	DynamicBalanceScaleGirl818	18	19	4
DynamicBalanceScaleGirl08	DynamicBalanceScaleGirl820	20		5
DynamicBalanceScaleGirl08	DynamicBalanceScaleGirl821	21		6
DynamicBalanceScaleGirl08	DynamicBalanceScaleGirl822	22	23	7
DynamicBalanceScaleGirl08	DynamicBalanceScaleGirl824	24		8
DynamicBalanceScaleGirl08	DynamicBalanceScaleGirl825	25		9
DynamicBalanceScaleGirl08	DynamicBalanceScaleGirl826	26	28	10
DynamicBalanceScaleGirl08	DynamicBalanceScaleGirl829	29		11
DynamicBalanceScaleGirl08	DynamicBalanceScaleGirl830	30		12
DynamicBalanceScaleGirl08	DynamicBalanceScaleGirl831	31	32	13
DynamicBalanceScaleGirl09	DynamicBalanceScaleGirl90	0	15	1
DynamicBalanceScaleGirl09	DynamicBalanceScaleGirl916	16	17	2
DynamicBalanceScaleGirl09	DynamicBalanceScaleGirl918	18		3
DynamicBalanceScaleGirl09	DynamicBalanceScaleGirl919	19	20	4
DynamicBalanceScaleGirl09	DynamicBalanceScaleGirl921	21		5
DynamicBalanceScaleGirl09	DynamicBalanceScaleGirl922	22		6
DynamicBalanceScaleGirl09	DynamicBalanceScaleGirl923	23	24	7
DynamicBalanceScaleGirl09	DynamicBalanceScaleGirl925	25		8
DynamicBalanceScaleGirl09	DynamicBalanceScaleGirl926	26		9
DynamicBalanceScaleGirl09	DynamicBalanceScaleGirl927	27	28	10
DynamicBalanceScaleGirl09	DynamicBalanceScaleGirl929	29		11
DynamicBalanceScaleGirl09	DynamicBalanceScaleGirl930	30		12
DynamicBalanceScaleGirl09	DynamicBalanceScaleGirl931	31	32	13
DynamicBalanceScaleGirl10	DynamicBalanceScaleGirl100	0	17	1
DynamicBalanceScaleGirl10	DynamicBalanceScaleGirl1018	18		2
DynamicBalanceScaleGirl10	DynamicBalanceScaleGirl1019	19		3
DynamicBalanceScaleGirl10	DynamicBalanceScaleGirl1020	20		4
DynamicBalanceScaleGirl10	DynamicBalanceScaleGirl1021	21	22	5
DynamicBalanceScaleGirl10	DynamicBalanceScaleGirl1023	23		6
DynamicBalanceScaleGirl10	DynamicBalanceScaleGirl1024	24	25	7
DynamicBalanceScaleGirl10	DynamicBalanceScaleGirl1026	26		8
DynamicBalanceScaleGirl10	DynamicBalanceScaleGirl1027	27		9
DynamicBalanceScaleGirl10	DynamicBalanceScaleGirl1028	28		10
DynamicBalanceScaleGirl10	DynamicBalanceScaleGirl1029	29	30	11
DynamicBalanceScaleGirl10	DynamicBalanceScaleGirl1031	31	32	13
DynamicBalanceScaleGirl11	DynamicBalanceScaleGirl110	0	21	1
DynamicBalanceScaleGirl11	DynamicBalanceScaleGirl1122	22		2
DynamicBalanceScaleGirl11	DynamicBalanceScaleGirl1123	23		3
DynamicBalanceScaleGirl11	DynamicBalanceScaleGirl1124	24		4
DynamicBalanceScaleGirl11	DynamicBalanceScaleGirl1125	25		5
DynamicBalanceScaleGirl11	DynamicBalanceScaleGirl1126	26	27	7
DynamicBalanceScaleGirl11	DynamicBalanceScaleGirl1128	28		8
DynamicBalanceScaleGirl11	DynamicBalanceScaleGirl1129	29	30	10
DynamicBalanceScaleGirl11	DynamicBalanceScaleGirl1131	31		11
DynamicBalanceScaleGirl11	DynamicBalanceScaleGirl1132	32		13
DynamicBalanceScaleGirl12	DynamicBalanceScaleGirl120	0	16	1
DynamicBalanceScaleGirl12	DynamicBalanceScaleGirl1217	17	22	3
DynamicBalanceScaleGirl12	DynamicBalanceScaleGirl1223	23	24	4
DynamicBalanceScaleGirl12	DynamicBalanceScaleGirl1225	25		6
DynamicBalanceScaleGirl12	DynamicBalanceScaleGirl1226	26	27	7
DynamicBalanceScaleGirl12	DynamicBalanceScaleGirl1228	28		8
DynamicBalanceScaleGirl12	DynamicBalanceScaleGirl1229	29	30	10
DynamicBalanceScaleGirl12	DynamicBalanceScaleGirl1231	31		11
DynamicBalanceScaleGirl12	DynamicBalanceScaleGirl1232	32		13
LadderRunScaleBoy06	LadderRunScaleBoy60	0	5.8	16
LadderRunScaleBoy06	LadderRunScaleBoy65,81	5.81	7	15
LadderRunScaleBoy06	LadderRunScaleBoy67,01	7.01	7.2	14
LadderRunScaleBoy06	LadderRunScaleBoy67,21	7.21	8.34	13
LadderRunScaleBoy06	LadderRunScaleBoy68,35	8.35	8.7	12
LadderRunScaleBoy06	LadderRunScaleBoy68,71	8.71	9.23	11
LadderRunScaleBoy06	LadderRunScaleBoy69,24	9.24	10.1	10
LadderRunScaleBoy06	LadderRunScaleBoy610,11	10.11	10.58	9
LadderRunScaleBoy06	LadderRunScaleBoy610,59	10.59	11	8
LadderRunScaleBoy06	LadderRunScaleBoy611,01	11.01	11.69	7
LadderRunScaleBoy06	LadderRunScaleBoy611,7	11.7	12.24	6
LadderRunScaleBoy06	LadderRunScaleBoy612,25	12.25	12.5	5
LadderRunScaleBoy06	LadderRunScaleBoy612,51	12.51	13.13	4
LadderRunScaleBoy06	LadderRunScaleBoy613,14	13.14	13.8	3
LadderRunScaleBoy06	LadderRunScaleBoy613,81	13.81	15.85	1
LadderRunScaleBoy07	LadderRunScaleBoy70	0	6.1	16
LadderRunScaleBoy07	LadderRunScaleBoy76,11	6.11	6.46	15
LadderRunScaleBoy07	LadderRunScaleBoy76,47	6.47	6.86	14
LadderRunScaleBoy07	LadderRunScaleBoy76,87	6.87	7.64	13
LadderRunScaleBoy07	LadderRunScaleBoy77,65	7.65	7.93	12
LadderRunScaleBoy07	LadderRunScaleBoy77,94	7.94	8.38	11
LadderRunScaleBoy07	LadderRunScaleBoy78,39	8.39	9.2	10
LadderRunScaleBoy07	LadderRunScaleBoy79,21	9.21	9.58	9
LadderRunScaleBoy07	LadderRunScaleBoy79,59	9.59	9.97	8
LadderRunScaleBoy07	LadderRunScaleBoy79,98	9.98	10.74	7
LadderRunScaleBoy07	LadderRunScaleBoy710,75	10.75	11.12	6
LadderRunScaleBoy07	LadderRunScaleBoy711,13	11.13	11.46	5
LadderRunScaleBoy07	LadderRunScaleBoy711,47	11.47	11.84	4
LadderRunScaleBoy07	LadderRunScaleBoy711,85	11.85	12.5	3
LadderRunScaleBoy07	LadderRunScaleBoy712,51	12.51	13.09	2
LadderRunScaleBoy07	LadderRunScaleBoy713,1	13.1	15.25	1
LadderRunScaleBoy08	LadderRunScaleBoy80	0	4.94	16
LadderRunScaleBoy08	LadderRunScaleBoy84,95	4.95	5.46	15
LadderRunScaleBoy08	LadderRunScaleBoy85,47	5.47	5.8	14
LadderRunScaleBoy08	LadderRunScaleBoy85,81	5.81	6.57	13
LadderRunScaleBoy08	LadderRunScaleBoy86,58	6.58	6.88	12
LadderRunScaleBoy08	LadderRunScaleBoy86,89	6.89	7.3	11
LadderRunScaleBoy08	LadderRunScaleBoy87,31	7.31	8.04	10
LadderRunScaleBoy08	LadderRunScaleBoy88,05	8.05	8.44	9
LadderRunScaleBoy08	LadderRunScaleBoy88,45	8.45	8.8	8
LadderRunScaleBoy08	LadderRunScaleBoy88,81	8.81	9.55	7
LadderRunScaleBoy08	LadderRunScaleBoy89,56	9.56	9.91	6
LadderRunScaleBoy08	LadderRunScaleBoy89,92	9.92	10.3	5
LadderRunScaleBoy08	LadderRunScaleBoy810,31	10.31	11.03	4
LadderRunScaleBoy08	LadderRunScaleBoy811,04	11.04	11.25	3
LadderRunScaleBoy08	LadderRunScaleBoy811,26	11.26	11.53	2
LadderRunScaleBoy08	LadderRunScaleBoy811,54	11.54	13.2	1
LadderRunScaleBoy09	LadderRunScaleBoy90	0	4.47	17
LadderRunScaleBoy09	LadderRunScaleBoy94,48	4.48	5.1	16
LadderRunScaleBoy09	LadderRunScaleBoy95,11	5.11	5.4	15
LadderRunScaleBoy09	LadderRunScaleBoy95,41	5.41	5.72	14
LadderRunScaleBoy09	LadderRunScaleBoy95,73	5.73	6.32	13
LadderRunScaleBoy09	LadderRunScaleBoy96,33	6.33	6.53	12
LadderRunScaleBoy09	LadderRunScaleBoy96,54	6.54	6.91	11
LadderRunScaleBoy09	LadderRunScaleBoy96,92	6.92	7.5	10
LadderRunScaleBoy09	LadderRunScaleBoy97,51	7.51	7.81	9
LadderRunScaleBoy09	LadderRunScaleBoy97,82	7.82	8.1	8
LadderRunScaleBoy09	LadderRunScaleBoy98,11	8.11	8.6	7
LadderRunScaleBoy09	LadderRunScaleBoy98,61	8.61	9	6
LadderRunScaleBoy09	LadderRunScaleBoy99,01	9.01	9.17	5
LadderRunScaleBoy09	LadderRunScaleBoy99,18	9.18	9.88	4
LadderRunScaleBoy09	LadderRunScaleBoy99,89	9.89	10.06	3
LadderRunScaleBoy09	LadderRunScaleBoy910,07	10.07	11.46	1
LadderRunScaleBoy10	LadderRunScaleBoy100	0	3.97	18
LadderRunScaleBoy10	LadderRunScaleBoy103,98	3.98	4.75	16
LadderRunScaleBoy10	LadderRunScaleBoy104,76	4.76	5.13	15
LadderRunScaleBoy10	LadderRunScaleBoy105,14	5.14	5.44	14
LadderRunScaleBoy10	LadderRunScaleBoy105,45	5.45	5.98	13
LadderRunScaleBoy10	LadderRunScaleBoy105,99	5.99	6.2	12
LadderRunScaleBoy10	LadderRunScaleBoy106,21	6.21	6.52	11
LadderRunScaleBoy10	LadderRunScaleBoy106,53	6.53	7.06	10
LadderRunScaleBoy10	LadderRunScaleBoy107,07	7.07	7.33	9
LadderRunScaleBoy10	LadderRunScaleBoy107,34	7.34	7.59	8
LadderRunScaleBoy10	LadderRunScaleBoy107,6	7.6	8.13	7
LadderRunScaleBoy10	LadderRunScaleBoy108,14	8.14	8.35	6
LadderRunScaleBoy10	LadderRunScaleBoy108,36	8.36	8.5	5
LadderRunScaleBoy10	LadderRunScaleBoy108,51	8.51	9.08	4
LadderRunScaleBoy10	LadderRunScaleBoy109,09	9.09	9.29	3
LadderRunScaleBoy10	LadderRunScaleBoy109,3	9.3	9.66	2
LadderRunScaleBoy10	LadderRunScaleBoy109,67	9.67	9.99	1
LadderRunScaleBoy11	LadderRunScaleBoy110	0	4.34	16
LadderRunScaleBoy11	LadderRunScaleBoy114,35	4.35	4.6	15
LadderRunScaleBoy11	LadderRunScaleBoy114,61	4.61	4.94	14
LadderRunScaleBoy11	LadderRunScaleBoy114,95	4.95	5.54	13
LadderRunScaleBoy11	LadderRunScaleBoy115,55	5.55	5.72	12
LadderRunScaleBoy11	LadderRunScaleBoy115,73	5.73	6.08	11
LadderRunScaleBoy11	LadderRunScaleBoy116,09	6.09	6.63	10
LadderRunScaleBoy11	LadderRunScaleBoy116,64	6.64	6.87	9
LadderRunScaleBoy11	LadderRunScaleBoy116,88	6.88	7.15	8
LadderRunScaleBoy11	LadderRunScaleBoy117,16	7.16	7.68	7
LadderRunScaleBoy11	LadderRunScaleBoy117,69	7.69	7.97	6
LadderRunScaleBoy11	LadderRunScaleBoy117,98	7.98	8.15	5
LadderRunScaleBoy11	LadderRunScaleBoy118,16	8.16	8.79	4
LadderRunScaleBoy11	LadderRunScaleBoy118,8	8.8	9.33	2
LadderRunScaleBoy11	LadderRunScaleBoy119,34	9.34	9.5	1
LadderRunScaleBoy12	LadderRunScaleBoy120	0	4.75	14
LadderRunScaleBoy12	LadderRunScaleBoy124,76	4.76	5.35	13
LadderRunScaleBoy12	LadderRunScaleBoy125,36	5.36	5.57	12
LadderRunScaleBoy12	LadderRunScaleBoy125,58	5.58	5.92	11
LadderRunScaleBoy12	LadderRunScaleBoy125,93	5.93	6.5	10
LadderRunScaleBoy12	LadderRunScaleBoy126,51	6.51	6.78	9
LadderRunScaleBoy12	LadderRunScaleBoy126,79	6.79	7.06	8
LadderRunScaleBoy12	LadderRunScaleBoy127,07	7.07	7.66	7
LadderRunScaleBoy12	LadderRunScaleBoy127,67	7.67	8.67	4
LadderRunScaleBoy12	LadderRunScaleBoy128,68	8.68	13.67	1
LadderRunScaleGirl06	LadderRunScaleGirl60	0	5.75	17
LadderRunScaleGirl06	LadderRunScaleGirl65,76	5.76	6.72	16
LadderRunScaleGirl06	LadderRunScaleGirl66,73	6.73	7.16	15
LadderRunScaleGirl06	LadderRunScaleGirl67,17	7.17	7.55	14
LadderRunScaleGirl06	LadderRunScaleGirl67,56	7.56	8.37	13
LadderRunScaleGirl06	LadderRunScaleGirl68,38	8.38	8.7	12
LadderRunScaleGirl06	LadderRunScaleGirl68,71	8.71	9.21	11
LadderRunScaleGirl06	LadderRunScaleGirl69,22	9.22	10.08	10
LadderRunScaleGirl06	LadderRunScaleGirl610,09	10.09	10.52	9
LadderRunScaleGirl06	LadderRunScaleGirl610,53	10.53	10.94	8
LadderRunScaleGirl06	LadderRunScaleGirl610,95	10.95	11.75	7
LadderRunScaleGirl06	LadderRunScaleGirl611,76	11.76	12.2	6
LadderRunScaleGirl06	LadderRunScaleGirl612,21	12.21	12.53	5
LadderRunScaleGirl06	LadderRunScaleGirl612,54	12.54	13.15	4
LadderRunScaleGirl06	LadderRunScaleGirl613,16	13.16	13.68	3
LadderRunScaleGirl06	LadderRunScaleGirl613,69	13.69	18.93	1
LadderRunScaleGirl07	LadderRunScaleGirl70	0	5.09	17
LadderRunScaleGirl07	LadderRunScaleGirl75,1	5.1	5.94	16
LadderRunScaleGirl07	LadderRunScaleGirl75,95	5.95	6.44	15
LadderRunScaleGirl07	LadderRunScaleGirl76,45	6.45	6.68	14
LadderRunScaleGirl07	LadderRunScaleGirl76,69	6.69	7.74	13
LadderRunScaleGirl07	LadderRunScaleGirl77,75	7.75	8.07	12
LadderRunScaleGirl07	LadderRunScaleGirl78,08	8.08	8.59	11
LadderRunScaleGirl07	LadderRunScaleGirl78,6	8.6	9.44	10
LadderRunScaleGirl07	LadderRunScaleGirl79,45	9.45	9.87	9
LadderRunScaleGirl07	LadderRunScaleGirl79,88	9.88	10.23	8
LadderRunScaleGirl07	LadderRunScaleGirl710,24	10.24	11.07	7
LadderRunScaleGirl07	LadderRunScaleGirl711,08	11.08	11.33	6
LadderRunScaleGirl07	LadderRunScaleGirl711,34	11.34	11.93	5
LadderRunScaleGirl07	LadderRunScaleGirl711,94	11.94	12.8	4
LadderRunScaleGirl07	LadderRunScaleGirl712,81	12.81	13.13	3
LadderRunScaleGirl07	LadderRunScaleGirl713,14	13.14	13.42	2
LadderRunScaleGirl07	LadderRunScaleGirl713,43	13.43	16.4	1
LadderRunScaleGirl08	LadderRunScaleGirl80	0	5.3	16
LadderRunScaleGirl08	LadderRunScaleGirl85,31	5.31	5.75	15
LadderRunScaleGirl08	LadderRunScaleGirl85,76	5.76	6.1	14
LadderRunScaleGirl08	LadderRunScaleGirl86,11	6.11	6.81	13
LadderRunScaleGirl08	LadderRunScaleGirl86,82	6.82	7.1	12
LadderRunScaleGirl08	LadderRunScaleGirl87,11	7.11	7.51	11
LadderRunScaleGirl08	LadderRunScaleGirl87,52	7.52	8.22	10
LadderRunScaleGirl08	LadderRunScaleGirl88,23	8.23	8.57	9
LadderRunScaleGirl08	LadderRunScaleGirl88,58	8.58	8.9	8
LadderRunScaleGirl08	LadderRunScaleGirl88,91	8.91	9.58	7
LadderRunScaleGirl08	LadderRunScaleGirl89,59	9.59	9.94	6
LadderRunScaleGirl08	LadderRunScaleGirl89,95	9.95	10.25	5
LadderRunScaleGirl08	LadderRunScaleGirl810,26	10.26	10.89	4
LadderRunScaleGirl08	LadderRunScaleGirl810,9	10.9	11.27	3
LadderRunScaleGirl08	LadderRunScaleGirl811,28	11.28	11.63	2
LadderRunScaleGirl08	LadderRunScaleGirl811,64	11.64	13.79	1
LadderRunScaleGirl09	LadderRunScaleGirl90	0	4.88	16
LadderRunScaleGirl09	LadderRunScaleGirl94,89	4.89	5.25	15
LadderRunScaleGirl09	LadderRunScaleGirl95,26	5.26	5.53	14
LadderRunScaleGirl09	LadderRunScaleGirl95,54	5.54	6.22	13
LadderRunScaleGirl09	LadderRunScaleGirl96,23	6.23	6.5	12
LadderRunScaleGirl09	LadderRunScaleGirl96,51	6.51	6.88	11
LadderRunScaleGirl09	LadderRunScaleGirl96,89	6.89	7.51	10
LadderRunScaleGirl09	LadderRunScaleGirl97,52	7.52	7.84	9
LadderRunScaleGirl09	LadderRunScaleGirl97,85	7.85	8.2	8
LadderRunScaleGirl09	LadderRunScaleGirl98,21	8.21	8.84	7
LadderRunScaleGirl09	LadderRunScaleGirl98,85	8.85	9.07	6
LadderRunScaleGirl09	LadderRunScaleGirl99,08	9.08	9.39	5
LadderRunScaleGirl09	LadderRunScaleGirl99,4	9.4	10.08	4
LadderRunScaleGirl09	LadderRunScaleGirl910,09	10.09	10.17	3
LadderRunScaleGirl09	LadderRunScaleGirl910,18	10.18	10.53	2
LadderRunScaleGirl09	LadderRunScaleGirl910,54	10.54	12.29	1
LadderRunScaleGirl10	LadderRunScaleGirl100	0	4.97	15
LadderRunScaleGirl10	LadderRunScaleGirl104,98	4.98	5.34	14
LadderRunScaleGirl10	LadderRunScaleGirl105,35	5.35	6	13
LadderRunScaleGirl10	LadderRunScaleGirl106,01	6.01	6.25	12
LadderRunScaleGirl10	LadderRunScaleGirl106,26	6.26	6.64	11
LadderRunScaleGirl10	LadderRunScaleGirl106,65	6.65	7.29	10
LadderRunScaleGirl10	LadderRunScaleGirl107,3	7.3	7.6	9
LadderRunScaleGirl10	LadderRunScaleGirl107,61	7.61	7.92	8
LadderRunScaleGirl10	LadderRunScaleGirl107,93	7.93	8.52	7
LadderRunScaleGirl10	LadderRunScaleGirl108,53	8.53	8.88	6
LadderRunScaleGirl10	LadderRunScaleGirl108,89	8.89	9.11	5
LadderRunScaleGirl10	LadderRunScaleGirl109,12	9.12	9.74	4
LadderRunScaleGirl10	LadderRunScaleGirl109,75	9.75	10.07	3
LadderRunScaleGirl10	LadderRunScaleGirl1010,08	10.08	10.39	2
LadderRunScaleGirl10	LadderRunScaleGirl1010,4	10.4	13.87	1
LadderRunScaleGirl11	LadderRunScaleGirl110	0	4.87	15
LadderRunScaleGirl11	LadderRunScaleGirl114,88	4.88	5.19	14
LadderRunScaleGirl11	LadderRunScaleGirl115,2	5.2	5.72	13
LadderRunScaleGirl11	LadderRunScaleGirl115,73	5.73	5.91	12
LadderRunScaleGirl11	LadderRunScaleGirl115,92	5.92	6.29	11
LadderRunScaleGirl11	LadderRunScaleGirl116,3	6.3	6.82	10
LadderRunScaleGirl11	LadderRunScaleGirl116,83	6.83	7.08	9
LadderRunScaleGirl11	LadderRunScaleGirl117,09	7.09	7.37	8
LadderRunScaleGirl11	LadderRunScaleGirl117,38	7.38	7.83	7
LadderRunScaleGirl11	LadderRunScaleGirl117,84	7.84	8.1	6
LadderRunScaleGirl11	LadderRunScaleGirl118,11	8.11	8.39	5
LadderRunScaleGirl11	LadderRunScaleGirl118,4	8.4	8.97	4
LadderRunScaleGirl11	LadderRunScaleGirl118,98	8.98	9.23	3
LadderRunScaleGirl11	LadderRunScaleGirl119,24	9.24	11.11	1
LadderRunScaleGirl12	LadderRunScaleGirl120	0	4.93	14
LadderRunScaleGirl12	LadderRunScaleGirl124,94	4.94	5.5	13
LadderRunScaleGirl12	LadderRunScaleGirl125,51	5.51	5.75	12
LadderRunScaleGirl12	LadderRunScaleGirl125,76	5.76	6.07	11
LadderRunScaleGirl12	LadderRunScaleGirl126,08	6.08	6.62	10
LadderRunScaleGirl12	LadderRunScaleGirl126,63	6.63	6.97	9
LadderRunScaleGirl12	LadderRunScaleGirl126,98	6.98	7.24	8
LadderRunScaleGirl12	LadderRunScaleGirl127,25	7.25	7.81	7
LadderRunScaleGirl12	LadderRunScaleGirl127,82	7.82	8.02	6
LadderRunScaleGirl12	LadderRunScaleGirl128,03	8.03	8.41	5
LadderRunScaleGirl12	LadderRunScaleGirl128,42	8.42	8.83	4
LadderRunScaleGirl12	LadderRunScaleGirl128,84	8.84	11.31	1
LadderStepsScaleBoy06	LadderStepsScaleBoy60	0	13.71	16
LadderStepsScaleBoy06	LadderStepsScaleBoy613,72	13.72	14.4	15
LadderStepsScaleBoy06	LadderStepsScaleBoy614,41	14.41	15.42	14
LadderStepsScaleBoy06	LadderStepsScaleBoy615,43	15.43	17.4	13
LadderStepsScaleBoy06	LadderStepsScaleBoy617,41	17.41	17.88	12
LadderStepsScaleBoy06	LadderStepsScaleBoy617,89	17.89	19.2	11
LadderStepsScaleBoy06	LadderStepsScaleBoy619,21	19.21	20.9	10
LadderStepsScaleBoy06	LadderStepsScaleBoy620,91	20.91	21.7	9
LadderStepsScaleBoy06	LadderStepsScaleBoy621,71	21.71	22.64	8
LadderStepsScaleBoy06	LadderStepsScaleBoy622,65	22.65	24.38	7
LadderStepsScaleBoy06	LadderStepsScaleBoy624,39	24.39	25.36	6
LadderStepsScaleBoy06	LadderStepsScaleBoy625,37	25.37	26.32	5
LadderStepsScaleBoy06	LadderStepsScaleBoy626,33	26.33	28.12	4
LadderStepsScaleBoy06	LadderStepsScaleBoy628,13	28.13	29	3
LadderStepsScaleBoy06	LadderStepsScaleBoy629,01	29.01	34.12	1
LadderStepsScaleBoy07	LadderStepsScaleBoy70	0	10.09	17
LadderStepsScaleBoy07	LadderStepsScaleBoy710,1	10.1	10.9	16
LadderStepsScaleBoy07	LadderStepsScaleBoy710,91	10.91	13.08	15
LadderStepsScaleBoy07	LadderStepsScaleBoy713,09	13.09	14.35	14
LadderStepsScaleBoy07	LadderStepsScaleBoy714,36	14.36	16.38	13
LadderStepsScaleBoy07	LadderStepsScaleBoy716,39	16.39	17.18	12
LadderStepsScaleBoy07	LadderStepsScaleBoy717,19	17.19	18.39	11
LadderStepsScaleBoy07	LadderStepsScaleBoy718,4	18.4	20.37	10
LadderStepsScaleBoy07	LadderStepsScaleBoy720,38	20.38	21.38	9
LadderStepsScaleBoy07	LadderStepsScaleBoy721,39	21.39	22.34	8
LadderStepsScaleBoy07	LadderStepsScaleBoy722,35	22.35	24.4	7
LadderStepsScaleBoy07	LadderStepsScaleBoy724,41	24.41	25.37	6
LadderStepsScaleBoy07	LadderStepsScaleBoy725,38	25.38	26.37	5
LadderStepsScaleBoy07	LadderStepsScaleBoy726,38	26.38	28.3	4
LadderStepsScaleBoy07	LadderStepsScaleBoy729,31	29.31	30.44	2
LadderStepsScaleBoy07	LadderStepsScaleBoy730,45	30.45	34.2	1
LadderStepsScaleBoy08	LadderStepsScaleBoy80	0	9.78	16
LadderStepsScaleBoy08	LadderStepsScaleBoy89,79	9.79	10.7	15
LadderStepsScaleBoy08	LadderStepsScaleBoy810,71	10.71	11.72	14
LadderStepsScaleBoy08	LadderStepsScaleBoy811,73	11.73	13.44	13
LadderStepsScaleBoy08	LadderStepsScaleBoy813,43	13.43	13.99	12
LadderStepsScaleBoy08	LadderStepsScaleBoy814	14	15.1	11
LadderStepsScaleBoy08	LadderStepsScaleBoy815,11	15.11	16.75	10
LadderStepsScaleBoy08	LadderStepsScaleBoy816,76	16.76	17.69	9
LadderStepsScaleBoy08	LadderStepsScaleBoy817,7	17.7	18.53	8
LadderStepsScaleBoy08	LadderStepsScaleBoy818,54	18.54	20.18	7
LadderStepsScaleBoy08	LadderStepsScaleBoy820,19	20.19	21.03	6
LadderStepsScaleBoy08	LadderStepsScaleBoy821,04	21.04	21.88	5
LadderStepsScaleBoy08	LadderStepsScaleBoy821,89	21.89	23.62	4
LadderStepsScaleBoy08	LadderStepsScaleBoy823,63	23.63	28	1
LadderStepsScaleBoy09	LadderStepsScaleBoy90	0	9.78	16
LadderStepsScaleBoy09	LadderStepsScaleBoy99,79	9.79	10.64	15
LadderStepsScaleBoy09	LadderStepsScaleBoy910,65	10.65	11.32	14
LadderStepsScaleBoy09	LadderStepsScaleBoy911,33	11.33	12.6	13
LadderStepsScaleBoy09	LadderStepsScaleBoy912,61	12.61	13.24	12
LadderStepsScaleBoy09	LadderStepsScaleBoy913,25	13.25	14.14	11
LadderStepsScaleBoy09	LadderStepsScaleBoy914,15	14.15	15.55	10
LadderStepsScaleBoy09	LadderStepsScaleBoy915,56	15.56	16.25	9
LadderStepsScaleBoy09	LadderStepsScaleBoy916,26	16.26	16.94	8
LadderStepsScaleBoy09	LadderStepsScaleBoy916,95	16.95	18.1	7
LadderStepsScaleBoy09	LadderStepsScaleBoy918,11	18.11	18.94	6
LadderStepsScaleBoy09	LadderStepsScaleBoy918,95	18.95	19.75	5
LadderStepsScaleBoy09	LadderStepsScaleBoy919,76	19.76	20.81	4
LadderStepsScaleBoy09	LadderStepsScaleBoy920,82	20.82	21.85	3
LadderStepsScaleBoy09	LadderStepsScaleBoy921,86	21.86	22.18	2
LadderStepsScaleBoy09	LadderStepsScaleBoy922,19	22.19	23.21	1
LadderStepsScaleBoy10	LadderStepsScaleBoy100	0	6.63	17
LadderStepsScaleBoy10	LadderStepsScaleBoy106,64	6.64	8.34	16
LadderStepsScaleBoy10	LadderStepsScaleBoy108,35	8.35	9.1	15
LadderStepsScaleBoy10	LadderStepsScaleBoy109,11	9.11	10.16	14
LadderStepsScaleBoy10	LadderStepsScaleBoy1010,17	10.17	11.82	13
LadderStepsScaleBoy10	LadderStepsScaleBoy1011,83	11.83	12.5	12
LadderStepsScaleBoy10	LadderStepsScaleBoy1012,51	12.51	13.41	11
LadderStepsScaleBoy10	LadderStepsScaleBoy1013,42	13.42	15	10
LadderStepsScaleBoy10	LadderStepsScaleBoy1015,01	15.01	15.69	9
LadderStepsScaleBoy10	LadderStepsScaleBoy1015,7	15.7	16.56	8
LadderStepsScaleBoy10	LadderStepsScaleBoy1016,57	16.57	18.07	7
LadderStepsScaleBoy10	LadderStepsScaleBoy1018,08	18.08	18.9	6
LadderStepsScaleBoy10	LadderStepsScaleBoy1018,91	18.91	19.26	5
LadderStepsScaleBoy10	LadderStepsScaleBoy1019,27	19.27	20.98	4
LadderStepsScaleBoy10	LadderStepsScaleBoy1020,99	20.99	21.36	3
LadderStepsScaleBoy10	LadderStepsScaleBoy1021,37	21.37	26.87	2
LadderStepsScaleBoy11	LadderStepsScaleBoy110	0	9.06	15
LadderStepsScaleBoy11	LadderStepsScaleBoy119,07	9.07	9.69	14
LadderStepsScaleBoy11	LadderStepsScaleBoy119,7	9.7	10.85	13
LadderStepsScaleBoy11	LadderStepsScaleBoy1110,86	10.86	11.35	12
LadderStepsScaleBoy11	LadderStepsScaleBoy1111,36	11.36	12.15	11
LadderStepsScaleBoy11	LadderStepsScaleBoy1112,16	12.16	13.39	10
LadderStepsScaleBoy11	LadderStepsScaleBoy1113,4	13.4	14	9
LadderStepsScaleBoy11	LadderStepsScaleBoy1114,01	14.01	14.59	8
LadderStepsScaleBoy11	LadderStepsScaleBoy1114,6	14.6	15.21	7
LadderStepsScaleBoy11	LadderStepsScaleBoy1115,22	15.22	16.28	6
LadderStepsScaleBoy11	LadderStepsScaleBoy1116,29	16.29	17.06	5
LadderStepsScaleBoy11	LadderStepsScaleBoy1117,07	17.07	18.03	4
LadderStepsScaleBoy11	LadderStepsScaleBoy1118,04	18.04	18.8	3
LadderStepsScaleBoy11	LadderStepsScaleBoy1118,81	18.81	19.12	2
LadderStepsScaleBoy11	LadderStepsScaleBoy1119,13	19.13	24.51	1
LadderStepsScaleBoy12	LadderStepsScaleBoy120	0	8.32	15
LadderStepsScaleBoy12	LadderStepsScaleBoy128,33	8.33	8.88	14
LadderStepsScaleBoy12	LadderStepsScaleBoy128,89	8.89	10.53	13
LadderStepsScaleBoy12	LadderStepsScaleBoy1210,54	10.54	11.03	12
LadderStepsScaleBoy12	LadderStepsScaleBoy1211,04	11.04	11.94	11
LadderStepsScaleBoy12	LadderStepsScaleBoy1211,95	11.95	13.36	10
LadderStepsScaleBoy12	LadderStepsScaleBoy1213,67	13.67	14.13	9
LadderStepsScaleBoy12	LadderStepsScaleBoy1214,14	14.14	14.47	8
LadderStepsScaleBoy12	LadderStepsScaleBoy1214,48	14.48	16.01	7
LadderStepsScaleBoy12	LadderStepsScaleBoy1216,02	16.02	16.78	6
LadderStepsScaleBoy12	LadderStepsScaleBoy1216,79	16.79	18.86	4
LadderStepsScaleBoy12	LadderStepsScaleBoy1218,87	18.87	20.44	2
LadderStepsScaleBoy12	LadderStepsScaleBoy1220,45	20.45	28.38	1
LadderStepsScaleGirl06	LadderStepsScaleGirl60	0	11.66	16
LadderStepsScaleGirl06	LadderStepsScaleGirl611,67	11.67	12.85	15
LadderStepsScaleGirl06	LadderStepsScaleGirl612,86	12.86	14.1	14
LadderStepsScaleGirl06	LadderStepsScaleGirl614,11	14.11	16.47	13
LadderStepsScaleGirl06	LadderStepsScaleGirl616,48	16.48	17.33	12
LadderStepsScaleGirl06	LadderStepsScaleGirl617,34	17.34	19	11
LadderStepsScaleGirl06	LadderStepsScaleGirl619,01	19.01	21.44	10
LadderStepsScaleGirl06	LadderStepsScaleGirl621,45	21.45	22.41	9
LadderStepsScaleGirl06	LadderStepsScaleGirl622,42	22.42	23.5	8
LadderStepsScaleGirl06	LadderStepsScaleGirl623,51	23.51	25.75	7
LadderStepsScaleGirl06	LadderStepsScaleGirl625,76	25.76	27.4	6
LadderStepsScaleGirl06	LadderStepsScaleGirl627,41	27.41	30.34	4
LadderStepsScaleGirl06	LadderStepsScaleGirl630,35	30.35	31.97	3
LadderStepsScaleGirl06	LadderStepsScaleGirl631,98	31.98	32.94	2
LadderStepsScaleGirl06	LadderStepsScaleGirl632,95	32.95	33.79	1
LadderStepsScaleGirl07	LadderStepsScaleGirl70	0	12.43	16
LadderStepsScaleGirl07	LadderStepsScaleGirl712,44	12.44	13.38	15
LadderStepsScaleGirl07	LadderStepsScaleGirl713,39	13.39	14.28	14
LadderStepsScaleGirl07	LadderStepsScaleGirl714,29	14.29	16.2	13
LadderStepsScaleGirl07	LadderStepsScaleGirl716,21	16.21	16.9	12
LadderStepsScaleGirl07	LadderStepsScaleGirl716,91	16.91	18.09	11
LadderStepsScaleGirl07	LadderStepsScaleGirl718,1	18.1	19.97	10
LadderStepsScaleGirl07	LadderStepsScaleGirl719,98	19.98	20.86	9
LadderStepsScaleGirl07	LadderStepsScaleGirl720,87	20.87	21.81	8
LadderStepsScaleGirl07	LadderStepsScaleGirl721,82	21.82	23.71	7
LadderStepsScaleGirl07	LadderStepsScaleGirl723,72	23.72	24.63	6
LadderStepsScaleGirl07	LadderStepsScaleGirl724,64	24.64	25.52	5
LadderStepsScaleGirl07	LadderStepsScaleGirl725,53	25.53	26.89	4
LadderStepsScaleGirl07	LadderStepsScaleGirl726,9	26.9	28	3
LadderStepsScaleGirl07	LadderStepsScaleGirl728,1	28.1	28.88	2
LadderStepsScaleGirl07	LadderStepsScaleGirl728,89	28.89	31.06	1
LadderStepsScaleGirl08	LadderStepsScaleGirl80	0	10.15	16
LadderStepsScaleGirl08	LadderStepsScaleGirl810,16	10.16	11.16	15
LadderStepsScaleGirl08	LadderStepsScaleGirl811,17	11.17	11.85	14
LadderStepsScaleGirl08	LadderStepsScaleGirl811,86	11.86	13.68	13
LadderStepsScaleGirl08	LadderStepsScaleGirl813,69	13.69	14.3	12
LadderStepsScaleGirl08	LadderStepsScaleGirl814,31	14.31	15.22	11
LadderStepsScaleGirl08	LadderStepsScaleGirl815,23	15.23	16.84	10
LadderStepsScaleGirl08	LadderStepsScaleGirl816,85	16.85	17.6	9
LadderStepsScaleGirl08	LadderStepsScaleGirl817,61	17.61	18.41	8
LadderStepsScaleGirl08	LadderStepsScaleGirl818,42	18.42	20	7
LadderStepsScaleGirl08	LadderStepsScaleGirl820,01	20.01	20.62	6
LadderStepsScaleGirl08	LadderStepsScaleGirl820,63	20.63	21.55	5
LadderStepsScaleGirl08	LadderStepsScaleGirl821,56	21.56	22.94	4
LadderStepsScaleGirl08	LadderStepsScaleGirl822,95	22.95	23.9	3
LadderStepsScaleGirl08	LadderStepsScaleGirl823,91	23.91	24.7	2
LadderStepsScaleGirl08	LadderStepsScaleGirl824,71	24.71	27.25	1
LadderStepsScaleGirl09	LadderStepsScaleGirl90	0	7.94	17
LadderStepsScaleGirl09	LadderStepsScaleGirl97,95	7.95	9.38	16
LadderStepsScaleGirl09	LadderStepsScaleGirl99,39	9.39	10.22	15
LadderStepsScaleGirl09	LadderStepsScaleGirl910,23	10.23	10.88	14
LadderStepsScaleGirl09	LadderStepsScaleGirl910,89	10.89	12.19	13
LadderStepsScaleGirl09	LadderStepsScaleGirl912,2	12.2	12.81	12
LadderStepsScaleGirl09	LadderStepsScaleGirl912,82	12.82	13.59	11
LadderStepsScaleGirl09	LadderStepsScaleGirl913,6	13.6	14.98	10
LadderStepsScaleGirl09	LadderStepsScaleGirl914,99	14.99	15.65	9
LadderStepsScaleGirl09	LadderStepsScaleGirl915,66	15.66	16.3	8
LadderStepsScaleGirl09	LadderStepsScaleGirl916,31	16.31	17.62	7
LadderStepsScaleGirl09	LadderStepsScaleGirl917,63	17.63	18.23	6
LadderStepsScaleGirl09	LadderStepsScaleGirl918,24	18.24	19	5
LadderStepsScaleGirl09	LadderStepsScaleGirl919,01	19.01	19.48	4
LadderStepsScaleGirl09	LadderStepsScaleGirl919,49	19.49	20.95	3
LadderStepsScaleGirl09	LadderStepsScaleGirl920,96	20.96	21.3	2
LadderStepsScaleGirl09	LadderStepsScaleGirl921,31	21.31	26.47	1
LadderStepsScaleGirl10	LadderStepsScaleGirl100	0	8.29	16
LadderStepsScaleGirl10	LadderStepsScaleGirl108,3	8.3	9.1	15
LadderStepsScaleGirl10	LadderStepsScaleGirl109,11	9.11	9.66	14
LadderStepsScaleGirl10	LadderStepsScaleGirl109,67	9.67	11.47	13
LadderStepsScaleGirl10	LadderStepsScaleGirl1011,48	11.48	12.13	12
LadderStepsScaleGirl10	LadderStepsScaleGirl1012,14	12.14	13.09	11
LadderStepsScaleGirl10	LadderStepsScaleGirl1013,1	13.1	14.66	10
LadderStepsScaleGirl10	LadderStepsScaleGirl1014,67	14.67	15.22	9
LadderStepsScaleGirl10	LadderStepsScaleGirl1015,23	15.23	16.19	8
LadderStepsScaleGirl10	LadderStepsScaleGirl1016,2	16.2	17.81	7
LadderStepsScaleGirl10	LadderStepsScaleGirl1017,82	17.82	18.35	6
LadderStepsScaleGirl10	LadderStepsScaleGirl1018,36	18.36	19.06	5
LadderStepsScaleGirl10	LadderStepsScaleGirl1019,07	19.07	20.98	4
LadderStepsScaleGirl10	LadderStepsScaleGirl1020,99	20.99	21.32	3
LadderStepsScaleGirl10	LadderStepsScaleGirl1021,33	21.33	22.64	2
LadderStepsScaleGirl10	LadderStepsScaleGirl1022,65	22.65	28.17	1
LadderStepsScaleGirl11	LadderStepsScaleGirl110	0	8	16
LadderStepsScaleGirl11	LadderStepsScaleGirl118,01	8.01	8.69	15
LadderStepsScaleGirl11	LadderStepsScaleGirl118,7	8.7	9.41	14
LadderStepsScaleGirl11	LadderStepsScaleGirl119,42	9.42	10.81	13
LadderStepsScaleGirl11	LadderStepsScaleGirl1110,82	10.82	11.44	12
LadderStepsScaleGirl11	LadderStepsScaleGirl1111,45	11.45	12.28	11
LadderStepsScaleGirl11	LadderStepsScaleGirl1112,29	12.29	13.7	10
LadderStepsScaleGirl11	LadderStepsScaleGirl1113,71	13.71	14.4	9
LadderStepsScaleGirl11	LadderStepsScaleGirl1114,41	14.41	14.89	8
LadderStepsScaleGirl11	LadderStepsScaleGirl1114,9	14.9	16.39	7
LadderStepsScaleGirl11	LadderStepsScaleGirl1116,4	16.4	16.98	6
LadderStepsScaleGirl11	LadderStepsScaleGirl1116,99	16.99	17.78	5
LadderStepsScaleGirl11	LadderStepsScaleGirl1117,79	17.79	19.2	4
LadderStepsScaleGirl11	LadderStepsScaleGirl1119,21	19.21	19.79	3
LadderStepsScaleGirl11	LadderStepsScaleGirl1119,8	19.8	22.94	1
LadderStepsScaleGirl12	LadderStepsScaleGirl120	0	7.87	16
LadderStepsScaleGirl12	LadderStepsScaleGirl127,88	7.88	8.84	14
LadderStepsScaleGirl12	LadderStepsScaleGirl128,85	8.85	10.6	13
LadderStepsScaleGirl12	LadderStepsScaleGirl1210,61	10.61	11	12
LadderStepsScaleGirl12	LadderStepsScaleGirl1211,01	11.01	11.94	11
LadderStepsScaleGirl12	LadderStepsScaleGirl1211,95	11.95	13.16	10
LadderStepsScaleGirl12	LadderStepsScaleGirl1213,17	13.17	13.95	9
LadderStepsScaleGirl12	LadderStepsScaleGirl1213,96	13.96	14.43	8
LadderStepsScaleGirl12	LadderStepsScaleGirl1214,44	14.44	15.85	7
LadderStepsScaleGirl12	LadderStepsScaleGirl1215,86	15.86	16.62	6
LadderStepsScaleGirl12	LadderStepsScaleGirl1216,63	16.63	18.16	4
LadderStepsScaleGirl12	LadderStepsScaleGirl1218,17	18.17	19.06	3
LadderStepsScaleGirl12	LadderStepsScaleGirl1219,07	19.07	23.48	1
LongJumpScaleBoy06	LongJumpScaleBoy60	0	45	3
LongJumpScaleBoy06	LongJumpScaleBoy646	46	53	4
LongJumpScaleBoy06	LongJumpScaleBoy654	54	61	5
LongJumpScaleBoy06	LongJumpScaleBoy662	62	65	6
LongJumpScaleBoy06	LongJumpScaleBoy666	66	75	7
LongJumpScaleBoy06	LongJumpScaleBoy676	76	80	8
LongJumpScaleBoy06	LongJumpScaleBoy681	81	85	9
LongJumpScaleBoy06	LongJumpScaleBoy686	86	95	10
LongJumpScaleBoy06	LongJumpScaleBoy696	96	100	11
LongJumpScaleBoy06	LongJumpScaleBoy6101	101	105	12
LongJumpScaleBoy06	LongJumpScaleBoy6106	106	115	13
LongJumpScaleBoy06	LongJumpScaleBoy6116	116	120	14
LongJumpScaleBoy06	LongJumpScaleBoy6121	121	125	15
LongJumpScaleBoy06	LongJumpScaleBoy6126	126	134	16
LongJumpScaleBoy06	LongJumpScaleBoy6135	135	141	18
LongJumpScaleBoy06	LongJumpScaleBoy6142	142	157	19
LongJumpScaleBoy07	LongJumpScaleBoy70	0	41	1
LongJumpScaleBoy07	LongJumpScaleBoy742	42	56	3
LongJumpScaleBoy07	LongJumpScaleBoy757	57	66	4
LongJumpScaleBoy07	LongJumpScaleBoy767	67	71	5
LongJumpScaleBoy07	LongJumpScaleBoy772	72	76	6
LongJumpScaleBoy07	LongJumpScaleBoy777	77	87	7
LongJumpScaleBoy07	LongJumpScaleBoy788	88	92	8
LongJumpScaleBoy07	LongJumpScaleBoy793	93	97	9
LongJumpScaleBoy07	LongJumpScaleBoy798	98	107	10
LongJumpScaleBoy07	LongJumpScaleBoy7108	108	114	11
LongJumpScaleBoy07	LongJumpScaleBoy7115	115	118	12
LongJumpScaleBoy07	LongJumpScaleBoy7119	119	128	13
LongJumpScaleBoy07	LongJumpScaleBoy7129	129	132	14
LongJumpScaleBoy07	LongJumpScaleBoy7133	133	138	15
LongJumpScaleBoy07	LongJumpScaleBoy7139	139	148	16
LongJumpScaleBoy07	LongJumpScaleBoy7149	149	154	17
LongJumpScaleBoy07	LongJumpScaleBoy7155	155		18
LongJumpScaleBoy07	LongJumpScaleBoy7156	156	160	19
LongJumpScaleBoy08	LongJumpScaleBoy80	0	50	1
LongJumpScaleBoy08	LongJumpScaleBoy851	51	67	3
LongJumpScaleBoy08	LongJumpScaleBoy868	68	78	4
LongJumpScaleBoy08	LongJumpScaleBoy879	79	84	5
LongJumpScaleBoy08	LongJumpScaleBoy885	85	89	6
LongJumpScaleBoy08	LongJumpScaleBoy890	90	100	7
LongJumpScaleBoy08	LongJumpScaleBoy8101	101	105	8
LongJumpScaleBoy08	LongJumpScaleBoy8106	106	111	9
LongJumpScaleBoy08	LongJumpScaleBoy8112	112	122	10
LongJumpScaleBoy08	LongJumpScaleBoy8123	123	128	11
LongJumpScaleBoy08	LongJumpScaleBoy8129	129	132	12
LongJumpScaleBoy08	LongJumpScaleBoy8133	133	143	13
LongJumpScaleBoy08	LongJumpScaleBoy8144	144	149	14
LongJumpScaleBoy08	LongJumpScaleBoy8150	150	154	15
LongJumpScaleBoy08	LongJumpScaleBoy8155	155	160	16
LongJumpScaleBoy08	LongJumpScaleBoy8161	161	169	17
LongJumpScaleBoy08	LongJumpScaleBoy8170	170	217	19
LongJumpScaleBoy09	LongJumpScaleBoy90	0	50	1
LongJumpScaleBoy09	LongJumpScaleBoy951	51	75	3
LongJumpScaleBoy09	LongJumpScaleBoy976	76	84	4
LongJumpScaleBoy09	LongJumpScaleBoy985	85	90	5
LongJumpScaleBoy09	LongJumpScaleBoy991	91	96	6
LongJumpScaleBoy09	LongJumpScaleBoy997	97	107	7
LongJumpScaleBoy09	LongJumpScaleBoy9108	108	112	8
LongJumpScaleBoy09	LongJumpScaleBoy9113	113	117	9
LongJumpScaleBoy09	LongJumpScaleBoy9118	118	128	10
LongJumpScaleBoy09	LongJumpScaleBoy9129	129	134	11
LongJumpScaleBoy09	LongJumpScaleBoy9135	135	138	12
LongJumpScaleBoy09	LongJumpScaleBoy9139	139	149	13
LongJumpScaleBoy09	LongJumpScaleBoy9150	150	154	14
LongJumpScaleBoy09	LongJumpScaleBoy9155	155	159	15
LongJumpScaleBoy09	LongJumpScaleBoy9160	160	169	16
LongJumpScaleBoy09	LongJumpScaleBoy9170	170	210	19
LongJumpScaleBoy10	LongJumpScaleBoy100	0	75	2
LongJumpScaleBoy10	LongJumpScaleBoy1076	76	83	3
LongJumpScaleBoy10	LongJumpScaleBoy1084	84	94	4
LongJumpScaleBoy10	LongJumpScaleBoy1095	95	99	5
LongJumpScaleBoy10	LongJumpScaleBoy10100	100	104	6
LongJumpScaleBoy10	LongJumpScaleBoy10105	105	114	7
LongJumpScaleBoy10	LongJumpScaleBoy10115	115	119	8
LongJumpScaleBoy10	LongJumpScaleBoy10120	120	124	9
LongJumpScaleBoy10	LongJumpScaleBoy10125	125	135	10
LongJumpScaleBoy10	LongJumpScaleBoy10136	136	140	11
LongJumpScaleBoy10	LongJumpScaleBoy10141	141	145	12
LongJumpScaleBoy10	LongJumpScaleBoy10146	146	155	13
LongJumpScaleBoy10	LongJumpScaleBoy10156	156	160	14
LongJumpScaleBoy10	LongJumpScaleBoy10161	161	164	15
LongJumpScaleBoy10	LongJumpScaleBoy10165	165	173	16
LongJumpScaleBoy10	LongJumpScaleBoy10174	174	197	19
LongJumpScaleBoy11	LongJumpScaleBoy110	0	73	1
LongJumpScaleBoy11	LongJumpScaleBoy1174	74	98	4
LongJumpScaleBoy11	LongJumpScaleBoy1199	99	105	5
LongJumpScaleBoy11	LongJumpScaleBoy11104	104	109	6
LongJumpScaleBoy11	LongJumpScaleBoy11110	110	120	7
LongJumpScaleBoy11	LongJumpScaleBoy11121	121	125	8
LongJumpScaleBoy11	LongJumpScaleBoy11126	126	130	9
LongJumpScaleBoy11	LongJumpScaleBoy11131	131	139	10
LongJumpScaleBoy11	LongJumpScaleBoy11140	140	145	11
LongJumpScaleBoy11	LongJumpScaleBoy11146	146	149	12
LongJumpScaleBoy11	LongJumpScaleBoy11150	150	157	13
LongJumpScaleBoy11	LongJumpScaleBoy11158	158	162	14
LongJumpScaleBoy11	LongJumpScaleBoy11163	163	167	15
LongJumpScaleBoy11	LongJumpScaleBoy11168	168	177	16
LongJumpScaleBoy12	LongJumpScaleBoy120	0	57	1
LongJumpScaleBoy12	LongJumpScaleBoy1258	58	95	4
LongJumpScaleBoy12	LongJumpScaleBoy1296	96	100	5
LongJumpScaleBoy12	LongJumpScaleBoy12101	101	109	6
LongJumpScaleBoy12	LongJumpScaleBoy12110	110	123	7
LongJumpScaleBoy12	LongJumpScaleBoy12124	124	129	8
LongJumpScaleBoy12	LongJumpScaleBoy12130	130	135	9
LongJumpScaleBoy12	LongJumpScaleBoy12136	136	147	10
LongJumpScaleBoy12	LongJumpScaleBoy12148	148	152	11
LongJumpScaleBoy12	LongJumpScaleBoy12153	153	157	12
LongJumpScaleBoy12	LongJumpScaleBoy12158	158	171	13
LongJumpScaleBoy12	LongJumpScaleBoy12172	172	176	14
LongJumpScaleBoy12	LongJumpScaleBoy12177	177	178	15
LongJumpScaleBoy12	LongJumpScaleBoy12179	179	191	16
LongJumpScaleBoy12	LongJumpScaleBoy12192	192	197	17
LongJumpScaleGirl06	LongJumpScaleGirl60	0	33	1
LongJumpScaleGirl06	LongJumpScaleGirl634	34	54	4
LongJumpScaleGirl06	LongJumpScaleGirl655	55	62	6
LongJumpScaleGirl06	LongJumpScaleGirl663	63	74	7
LongJumpScaleGirl06	LongJumpScaleGirl675	75	77	8
LongJumpScaleGirl06	LongJumpScaleGirl678	78	83	9
LongJumpScaleGirl06	LongJumpScaleGirl684	84	92	10
LongJumpScaleGirl06	LongJumpScaleGirl693	93	97	11
LongJumpScaleGirl06	LongJumpScaleGirl698	98	102	12
LongJumpScaleGirl06	LongJumpScaleGirl6103	103	111	13
LongJumpScaleGirl06	LongJumpScaleGirl6112	112	115	14
LongJumpScaleGirl06	LongJumpScaleGirl6116	116	119	15
LongJumpScaleGirl06	LongJumpScaleGirl6120	120	129	16
LongJumpScaleGirl06	LongJumpScaleGirl6130	130	135	17
LongJumpScaleGirl06	LongJumpScaleGirl6136	136	138	18
LongJumpScaleGirl06	LongJumpScaleGirl6139	139	156	19
LongJumpScaleGirl07	LongJumpScaleGirl70	0	53	3
LongJumpScaleGirl07	LongJumpScaleGirl754	54	64	4
LongJumpScaleGirl07	LongJumpScaleGirl765	65	69	5
LongJumpScaleGirl07	LongJumpScaleGirl770	70	74	6
LongJumpScaleGirl07	LongJumpScaleGirl775	75	84	7
LongJumpScaleGirl07	LongJumpScaleGirl785	85	90	8
LongJumpScaleGirl07	LongJumpScaleGirl791	91	95	9
LongJumpScaleGirl07	LongJumpScaleGirl796	96	105	10
LongJumpScaleGirl07	LongJumpScaleGirl7106	106	111	11
LongJumpScaleGirl07	LongJumpScaleGirl7112	112	115	12
LongJumpScaleGirl07	LongJumpScaleGirl7116	116	126	13
LongJumpScaleGirl07	LongJumpScaleGirl7127	127	130	14
LongJumpScaleGirl07	LongJumpScaleGirl7131	131	136	15
LongJumpScaleGirl07	LongJumpScaleGirl7137	137	142	16
LongJumpScaleGirl07	LongJumpScaleGirl7143	143	149	17
LongJumpScaleGirl07	LongJumpScaleGirl7150	150	224	19
LongJumpScaleGirl08	LongJumpScaleGirl80	0	60	2
LongJumpScaleGirl08	LongJumpScaleGirl861	61	74	4
LongJumpScaleGirl08	LongJumpScaleGirl875	75	78	5
LongJumpScaleGirl08	LongJumpScaleGirl879	79	83	6
LongJumpScaleGirl08	LongJumpScaleGirl884	84	92	7
LongJumpScaleGirl08	LongJumpScaleGirl893	93	97	8
LongJumpScaleGirl08	LongJumpScaleGirl898	98	102	9
LongJumpScaleGirl08	LongJumpScaleGirl8103	103	111	10
LongJumpScaleGirl08	LongJumpScaleGirl8112	112	117	11
LongJumpScaleGirl08	LongJumpScaleGirl8118	118	120	12
LongJumpScaleGirl08	LongJumpScaleGirl8121	121	130	13
LongJumpScaleGirl08	LongJumpScaleGirl8131	131	132	14
LongJumpScaleGirl08	LongJumpScaleGirl8133	133	139	15
LongJumpScaleGirl08	LongJumpScaleGirl8140	140	146	16
LongJumpScaleGirl08	LongJumpScaleGirl8147	147	149	17
LongJumpScaleGirl08	LongJumpScaleGirl8150	150	155	18
LongJumpScaleGirl08	LongJumpScaleGirl8156	156	160	19
LongJumpScaleGirl09	LongJumpScaleGirl90	0	42	1
LongJumpScaleGirl09	LongJumpScaleGirl943	43	69	3
LongJumpScaleGirl09	LongJumpScaleGirl970	70	78	4
LongJumpScaleGirl09	LongJumpScaleGirl979	79	83	5
LongJumpScaleGirl09	LongJumpScaleGirl984	84	90	6
LongJumpScaleGirl09	LongJumpScaleGirl991	91	100	7
LongJumpScaleGirl09	LongJumpScaleGirl9101	101	104	8
LongJumpScaleGirl09	LongJumpScaleGirl9105	105	109	9
LongJumpScaleGirl09	LongJumpScaleGirl9110	110	119	10
LongJumpScaleGirl09	LongJumpScaleGirl9120	120	125	11
LongJumpScaleGirl09	LongJumpScaleGirl9126	126	129	12
LongJumpScaleGirl09	LongJumpScaleGirl9130	130	139	13
LongJumpScaleGirl09	LongJumpScaleGirl9140	140	144	14
LongJumpScaleGirl09	LongJumpScaleGirl9145	145	148	15
LongJumpScaleGirl09	LongJumpScaleGirl9149	149	158	16
LongJumpScaleGirl09	LongJumpScaleGirl9159	159	160	17
LongJumpScaleGirl09	LongJumpScaleGirl9161	161	164	18
LongJumpScaleGirl09	LongJumpScaleGirl9165	165	195	19
LongJumpScaleGirl10	LongJumpScaleGirl100	0	74	1
LongJumpScaleGirl10	LongJumpScaleGirl1075	75	92	4
LongJumpScaleGirl10	LongJumpScaleGirl1093	93	96	5
LongJumpScaleGirl10	LongJumpScaleGirl1097	97	101	6
LongJumpScaleGirl10	LongJumpScaleGirl10102	102	110	7
LongJumpScaleGirl10	LongJumpScaleGirl10111	111	114	8
LongJumpScaleGirl10	LongJumpScaleGirl10115	115	119	9
LongJumpScaleGirl10	LongJumpScaleGirl10120	120	128	10
LongJumpScaleGirl10	LongJumpScaleGirl10129	129	133	11
LongJumpScaleGirl10	LongJumpScaleGirl10134	134	136	12
LongJumpScaleGirl10	LongJumpScaleGirl10137	137	145	13
LongJumpScaleGirl10	LongJumpScaleGirl10146	146	150	14
LongJumpScaleGirl10	LongJumpScaleGirl10151	151	154	15
LongJumpScaleGirl10	LongJumpScaleGirl10155	155	162	16
LongJumpScaleGirl11	LongJumpScaleGirl110	0	73	2
LongJumpScaleGirl11	LongJumpScaleGirl1174	74	78	3
LongJumpScaleGirl11	LongJumpScaleGirl1179	79	83	4
LongJumpScaleGirl11	LongJumpScaleGirl1184	84	94	5
LongJumpScaleGirl11	LongJumpScaleGirl1195	95		6
LongJumpScaleGirl11	LongJumpScaleGirl1196	96	109	7
LongJumpScaleGirl11	LongJumpScaleGirl11110	110	114	8
LongJumpScaleGirl11	LongJumpScaleGirl11115	115	120	9
LongJumpScaleGirl11	LongJumpScaleGirl11121	121	130	10
LongJumpScaleGirl11	LongJumpScaleGirl11131	131	136	11
LongJumpScaleGirl11	LongJumpScaleGirl11137	137	140	12
LongJumpScaleGirl11	LongJumpScaleGirl11141	141	151	13
LongJumpScaleGirl11	LongJumpScaleGirl11152	152	156	14
LongJumpScaleGirl11	LongJumpScaleGirl11157	157	159	15
LongJumpScaleGirl11	LongJumpScaleGirl11160	160	171	16
LongJumpScaleGirl11	LongJumpScaleGirl11172	172	181	18
LongJumpScaleGirl11	LongJumpScaleGirl11182	182	185	19
LongJumpScaleGirl12	LongJumpScaleGirl120	0	48	1
LongJumpScaleGirl12	LongJumpScaleGirl1249	49	84	4
LongJumpScaleGirl12	LongJumpScaleGirl1285	85	94	6
LongJumpScaleGirl12	LongJumpScaleGirl1295	95	111	7
LongJumpScaleGirl12	LongJumpScaleGirl12112	112	117	8
LongJumpScaleGirl12	LongJumpScaleGirl12118	118	124	9
LongJumpScaleGirl12	LongJumpScaleGirl12126	126	136	10
LongJumpScaleGirl12	LongJumpScaleGirl12137	137	144	11
LongJumpScaleGirl12	LongJumpScaleGirl12145	145	149	12
LongJumpScaleGirl12	LongJumpScaleGirl12150	150	161	13
LongJumpScaleGirl12	LongJumpScaleGirl12162	162	164	14
LongJumpScaleGirl12	LongJumpScaleGirl12165	165	171	15
LongJumpScaleGirl12	LongJumpScaleGirl12172	172	187	17
OverhandthrowScaleBoy06	OverhandthrowScaleBoy60	0	91	4
OverhandthrowScaleBoy06	OverhandthrowScaleBoy692	92	101	5
OverhandthrowScaleBoy06	OverhandthrowScaleBoy6102	102	112	6
OverhandthrowScaleBoy06	OverhandthrowScaleBoy6113	113	128	7
OverhandthrowScaleBoy06	OverhandthrowScaleBoy6129	129	137	8
OverhandthrowScaleBoy06	OverhandthrowScaleBoy6138	138	145	9
OverhandthrowScaleBoy06	OverhandthrowScaleBoy6146	146	162	10
OverhandthrowScaleBoy06	OverhandthrowScaleBoy6163	163	171	11
OverhandthrowScaleBoy06	OverhandthrowScaleBoy6172	172	178	12
OverhandthrowScaleBoy06	OverhandthrowScaleBoy6179	179	195	13
OverhandthrowScaleBoy06	OverhandthrowScaleBoy6196	196	200	14
OverhandthrowScaleBoy06	OverhandthrowScaleBoy6201	201	210	15
OverhandthrowScaleBoy06	OverhandthrowScaleBoy6211	211	227	16
OverhandthrowScaleBoy07	OverhandthrowScaleBoy70	0	97	4
OverhandthrowScaleBoy07	OverhandthrowScaleBoy798	98	107	5
OverhandthrowScaleBoy07	OverhandthrowScaleBoy7108	108	116	6
OverhandthrowScaleBoy07	OverhandthrowScaleBoy7117	117	135	7
OverhandthrowScaleBoy07	OverhandthrowScaleBoy7136	136	145	8
OverhandthrowScaleBoy07	OverhandthrowScaleBoy7146	146	154	9
OverhandthrowScaleBoy07	OverhandthrowScaleBoy7155	155	173	10
OverhandthrowScaleBoy07	OverhandthrowScaleBoy7174	174	184	11
OverhandthrowScaleBoy07	OverhandthrowScaleBoy7185	185	192	12
OverhandthrowScaleBoy07	OverhandthrowScaleBoy7193	193	210	13
OverhandthrowScaleBoy07	OverhandthrowScaleBoy7211	211	220	14
OverhandthrowScaleBoy07	OverhandthrowScaleBoy7221	221	225	15
OverhandthrowScaleBoy07	OverhandthrowScaleBoy7226	226	248	16
OverhandthrowScaleBoy07	OverhandthrowScaleBoy7249	249	255	17
OverhandthrowScaleBoy07	OverhandthrowScaleBoy7256	256	294	19
OverhandthrowScaleBoy08	OverhandthrowScaleBoy80	0	93	3
OverhandthrowScaleBoy08	OverhandthrowScaleBoy894	94	113	4
OverhandthrowScaleBoy08	OverhandthrowScaleBoy8114	114	129	5
OverhandthrowScaleBoy08	OverhandthrowScaleBoy8130	130	141	6
OverhandthrowScaleBoy08	OverhandthrowScaleBoy8142	142	164	7
OverhandthrowScaleBoy08	OverhandthrowScaleBoy8165	165	175	8
OverhandthrowScaleBoy08	OverhandthrowScaleBoy8176	176	186	9
OverhandthrowScaleBoy08	OverhandthrowScaleBoy8187	187	210	10
OverhandthrowScaleBoy08	OverhandthrowScaleBoy8211	211	224	11
OverhandthrowScaleBoy08	OverhandthrowScaleBoy8225	225	231	12
OverhandthrowScaleBoy08	OverhandthrowScaleBoy8232	232	255	13
OverhandthrowScaleBoy08	OverhandthrowScaleBoy8256	256	266	14
OverhandthrowScaleBoy08	OverhandthrowScaleBoy8267	267	280	15
OverhandthrowScaleBoy08	OverhandthrowScaleBoy8281	281	302	16
OverhandthrowScaleBoy08	OverhandthrowScaleBoy8303	303	310	17
OverhandthrowScaleBoy08	OverhandthrowScaleBoy8311	311	323	18
OverhandthrowScaleBoy08	OverhandthrowScaleBoy8324	324	347	19
OverhandthrowScaleBoy09	OverhandthrowScaleBoy90	0	109	1
OverhandthrowScaleBoy09	OverhandthrowScaleBoy9110	110	130	3
OverhandthrowScaleBoy09	OverhandthrowScaleBoy9131	131	151	4
OverhandthrowScaleBoy09	OverhandthrowScaleBoy9152	152	162	5
OverhandthrowScaleBoy09	OverhandthrowScaleBoy9163	163	173	6
OverhandthrowScaleBoy09	OverhandthrowScaleBoy9174	174	194	7
OverhandthrowScaleBoy09	OverhandthrowScaleBoy9195	195	204	8
OverhandthrowScaleBoy09	OverhandthrowScaleBoy9205	205	214	9
OverhandthrowScaleBoy09	OverhandthrowScaleBoy9215	215	235	10
OverhandthrowScaleBoy09	OverhandthrowScaleBoy9236	236	248	11
OverhandthrowScaleBoy09	OverhandthrowScaleBoy9249	249	255	12
OverhandthrowScaleBoy09	OverhandthrowScaleBoy9256	256	277	13
OverhandthrowScaleBoy09	OverhandthrowScaleBoy9278	278	288	14
OverhandthrowScaleBoy09	OverhandthrowScaleBoy9289	289	292	15
OverhandthrowScaleBoy09	OverhandthrowScaleBoy9293	293	317	16
OverhandthrowScaleBoy09	OverhandthrowScaleBoy9318	318	324	17
OverhandthrowScaleBoy09	OverhandthrowScaleBoy9325	325	340	18
OverhandthrowScaleBoy09	OverhandthrowScaleBoy9341	341	354	19
OverhandthrowScaleBoy10	OverhandthrowScaleBoy100	0	145	3
OverhandthrowScaleBoy10	OverhandthrowScaleBoy10146	146	169	4
OverhandthrowScaleBoy10	OverhandthrowScaleBoy10170	170	182	5
OverhandthrowScaleBoy10	OverhandthrowScaleBoy10183	183	193	6
OverhandthrowScaleBoy10	OverhandthrowScaleBoy10194	194	214	7
OverhandthrowScaleBoy10	OverhandthrowScaleBoy10215	215	224	8
OverhandthrowScaleBoy10	OverhandthrowScaleBoy10225	225	234	9
OverhandthrowScaleBoy10	OverhandthrowScaleBoy10235	235	255	10
OverhandthrowScaleBoy10	OverhandthrowScaleBoy10256	256	267	11
OverhandthrowScaleBoy10	OverhandthrowScaleBoy10268	268	274	12
OverhandthrowScaleBoy10	OverhandthrowScaleBoy10275	275	292	13
OverhandthrowScaleBoy10	OverhandthrowScaleBoy10293	293	305	14
OverhandthrowScaleBoy10	OverhandthrowScaleBoy10306	306	315	15
OverhandthrowScaleBoy10	OverhandthrowScaleBoy10316	316	348	17
OverhandthrowScaleBoy10	OverhandthrowScaleBoy10349	349	351	18
OverhandthrowScaleBoy10	OverhandthrowScaleBoy10352	352	385	19
OverhandthrowScaleBoy11	OverhandthrowScaleBoy110	0	184	4
OverhandthrowScaleBoy11	OverhandthrowScaleBoy11185	185	197	5
OverhandthrowScaleBoy11	OverhandthrowScaleBoy11198	198	210	6
OverhandthrowScaleBoy11	OverhandthrowScaleBoy11211	211	236	7
OverhandthrowScaleBoy11	OverhandthrowScaleBoy11237	237	249	8
OverhandthrowScaleBoy11	OverhandthrowScaleBoy11250	250	261	9
OverhandthrowScaleBoy11	OverhandthrowScaleBoy11262	262	288	10
OverhandthrowScaleBoy11	OverhandthrowScaleBoy11289	289	304	11
OverhandthrowScaleBoy11	OverhandthrowScaleBoy11305	305	314	12
OverhandthrowScaleBoy11	OverhandthrowScaleBoy11315	315	340	13
OverhandthrowScaleBoy11	OverhandthrowScaleBoy11341	341	346	14
OverhandthrowScaleBoy11	OverhandthrowScaleBoy11347	347	366	15
OverhandthrowScaleBoy11	OverhandthrowScaleBoy11367	367	381	16
OverhandthrowScaleBoy11	OverhandthrowScaleBoy11382	382	400	17
OverhandthrowScaleBoy11	OverhandthrowScaleBoy11401	401	487	19
OverhandthrowScaleBoy12	OverhandthrowScaleBoy120	0	157	3
OverhandthrowScaleBoy12	OverhandthrowScaleBoy12158	158	196	4
OverhandthrowScaleBoy12	OverhandthrowScaleBoy12197	197	230	6
OverhandthrowScaleBoy12	OverhandthrowScaleBoy12231	231	262	7
OverhandthrowScaleBoy12	OverhandthrowScaleBoy12263	263	280	8
OverhandthrowScaleBoy12	OverhandthrowScaleBoy12281	281	294	9
OverhandthrowScaleBoy12	OverhandthrowScaleBoy12295	295	325	10
OverhandthrowScaleBoy12	OverhandthrowScaleBoy12326	326	343	11
OverhandthrowScaleBoy12	OverhandthrowScaleBoy12344	344	354	12
OverhandthrowScaleBoy12	OverhandthrowScaleBoy12355	355	382	13
OverhandthrowScaleBoy12	OverhandthrowScaleBoy12383	383	400	14
OverhandthrowScaleBoy12	OverhandthrowScaleBoy12401	401	407	15
OverhandthrowScaleBoy12	OverhandthrowScaleBoy12408	408	443	16
OverhandthrowScaleBoy12	OverhandthrowScaleBoy12444	444	458	17
OverhandthrowScaleBoy12	OverhandthrowScaleBoy12459	459	480	18
OverhandthrowScaleGirl06	OverhandthrowScaleGirl60	0	46	3
OverhandthrowScaleGirl06	OverhandthrowScaleGirl647	47	59	4
OverhandthrowScaleGirl06	OverhandthrowScaleGirl660	60	80	5
OverhandthrowScaleGirl06	OverhandthrowScaleGirl681	81	113	7
OverhandthrowScaleGirl06	OverhandthrowScaleGirl6114	114	124	8
OverhandthrowScaleGirl06	OverhandthrowScaleGirl6125	125	134	9
OverhandthrowScaleGirl06	OverhandthrowScaleGirl6135	135	152	10
OverhandthrowScaleGirl06	OverhandthrowScaleGirl6153	153	165	11
OverhandthrowScaleGirl06	OverhandthrowScaleGirl6166	166	175	12
OverhandthrowScaleGirl06	OverhandthrowScaleGirl6176	176	196	13
OverhandthrowScaleGirl06	OverhandthrowScaleGirl6197	197	205	14
OverhandthrowScaleGirl06	OverhandthrowScaleGirl6206	206	212	15
OverhandthrowScaleGirl06	OverhandthrowScaleGirl6213	213	243	17
OverhandthrowScaleGirl06	OverhandthrowScaleGirl6244	244	335	19
OverhandthrowScaleGirl07	OverhandthrowScaleGirl70	0	56	2
OverhandthrowScaleGirl07	OverhandthrowScaleGirl757	57	87	4
OverhandthrowScaleGirl07	OverhandthrowScaleGirl788	88	98	5
OverhandthrowScaleGirl07	OverhandthrowScaleGirl799	99	107	6
OverhandthrowScaleGirl07	OverhandthrowScaleGirl7108	108	127	7
OverhandthrowScaleGirl07	OverhandthrowScaleGirl7128	128	137	8
OverhandthrowScaleGirl07	OverhandthrowScaleGirl7138	138	147	9
OverhandthrowScaleGirl07	OverhandthrowScaleGirl7148	148	166	10
OverhandthrowScaleGirl07	OverhandthrowScaleGirl7167	167	178	11
OverhandthrowScaleGirl07	OverhandthrowScaleGirl7179	179	186	12
OverhandthrowScaleGirl07	OverhandthrowScaleGirl7187	187	205	13
OverhandthrowScaleGirl07	OverhandthrowScaleGirl7206	206	215	14
OverhandthrowScaleGirl07	OverhandthrowScaleGirl7216	216	225	15
OverhandthrowScaleGirl07	OverhandthrowScaleGirl7226	226	244	16
OverhandthrowScaleGirl07	OverhandthrowScaleGirl7245	245	250	17
OverhandthrowScaleGirl07	OverhandthrowScaleGirl7251	251	256	18
OverhandthrowScaleGirl07	OverhandthrowScaleGirl7257	257	296	19
OverhandthrowScaleGirl08	OverhandthrowScaleGirl80	0	85	3
OverhandthrowScaleGirl08	OverhandthrowScaleGirl886	86	108	4
OverhandthrowScaleGirl08	OverhandthrowScaleGirl8109	109	119	5
OverhandthrowScaleGirl08	OverhandthrowScaleGirl8120	120	129	6
OverhandthrowScaleGirl08	OverhandthrowScaleGirl8130	130	151	7
OverhandthrowScaleGirl08	OverhandthrowScaleGirl8152	152	161	8
OverhandthrowScaleGirl08	OverhandthrowScaleGirl8162	162	172	9
OverhandthrowScaleGirl08	OverhandthrowScaleGirl8173	173	192	10
OverhandthrowScaleGirl08	OverhandthrowScaleGirl8193	193	206	11
OverhandthrowScaleGirl08	OverhandthrowScaleGirl8207	207	215	12
OverhandthrowScaleGirl08	OverhandthrowScaleGirl8216	216	235	13
OverhandthrowScaleGirl08	OverhandthrowScaleGirl8236	236	246	14
OverhandthrowScaleGirl08	OverhandthrowScaleGirl8247	247	257	15
OverhandthrowScaleGirl08	OverhandthrowScaleGirl8258	258	275	16
OverhandthrowScaleGirl08	OverhandthrowScaleGirl8276	276	285	17
OverhandthrowScaleGirl08	OverhandthrowScaleGirl8386	386	336	19
OverhandthrowScaleGirl09	OverhandthrowScaleGirl90	0	80	1
OverhandthrowScaleGirl09	OverhandthrowScaleGirl981	81	93	2
OverhandthrowScaleGirl09	OverhandthrowScaleGirl994	94	106	3
OverhandthrowScaleGirl09	OverhandthrowScaleGirl9107	107	124	4
OverhandthrowScaleGirl09	OverhandthrowScaleGirl9125	125	138	5
OverhandthrowScaleGirl09	OverhandthrowScaleGirl9139	139	151	6
OverhandthrowScaleGirl09	OverhandthrowScaleGirl9152	152	173	7
OverhandthrowScaleGirl09	OverhandthrowScaleGirl9174	174	185	8
OverhandthrowScaleGirl09	OverhandthrowScaleGirl9186	186	197	9
OverhandthrowScaleGirl09	OverhandthrowScaleGirl9198	198	219	10
OverhandthrowScaleGirl09	OverhandthrowScaleGirl9220	220	233	11
OverhandthrowScaleGirl09	OverhandthrowScaleGirl9234	234	241	12
OverhandthrowScaleGirl09	OverhandthrowScaleGirl9242	242	265	13
OverhandthrowScaleGirl09	OverhandthrowScaleGirl9266	266	276	14
OverhandthrowScaleGirl09	OverhandthrowScaleGirl9277	277	287	15
OverhandthrowScaleGirl09	OverhandthrowScaleGirl9288	288	310	16
OverhandthrowScaleGirl09	OverhandthrowScaleGirl9311	311	318	17
OverhandthrowScaleGirl09	OverhandthrowScaleGirl9319	319	331	18
OverhandthrowScaleGirl09	OverhandthrowScaleGirl9332	332	357	19
OverhandthrowScaleGirl10	OverhandthrowScaleGirl100	0	113	2
OverhandthrowScaleGirl10	OverhandthrowScaleGirl10114	114	124	3
OverhandthrowScaleGirl10	OverhandthrowScaleGirl10125	125	141	4
OverhandthrowScaleGirl10	OverhandthrowScaleGirl10142	142	163	5
OverhandthrowScaleGirl10	OverhandthrowScaleGirl10164	164	174	6
OverhandthrowScaleGirl10	OverhandthrowScaleGirl10175	175	197	7
OverhandthrowScaleGirl10	OverhandthrowScaleGirl10198	198	210	8
OverhandthrowScaleGirl10	OverhandthrowScaleGirl10211	211	221	9
OverhandthrowScaleGirl10	OverhandthrowScaleGirl10222	222	245	10
OverhandthrowScaleGirl10	OverhandthrowScaleGirl10246	246	258	11
OverhandthrowScaleGirl10	OverhandthrowScaleGirl10259	259	269	12
OverhandthrowScaleGirl10	OverhandthrowScaleGirl10270	270	291	13
OverhandthrowScaleGirl10	OverhandthrowScaleGirl10292	292	303	14
OverhandthrowScaleGirl10	OverhandthrowScaleGirl10304	304	338	16
OverhandthrowScaleGirl10	OverhandthrowScaleGirl10339	339	359	18
OverhandthrowScaleGirl10	OverhandthrowScaleGirl10360	360	374	19
OverhandthrowScaleGirl11	OverhandthrowScaleGirl110	0	129	2
OverhandthrowScaleGirl11	OverhandthrowScaleGirl11130	130	163	4
OverhandthrowScaleGirl11	OverhandthrowScaleGirl11164	164	182	5
OverhandthrowScaleGirl11	OverhandthrowScaleGirl11183	183	192	6
OverhandthrowScaleGirl11	OverhandthrowScaleGirl11193	193	216	7
OverhandthrowScaleGirl11	OverhandthrowScaleGirl11217	217	228	8
OverhandthrowScaleGirl11	OverhandthrowScaleGirl11229	229	241	9
OverhandthrowScaleGirl11	OverhandthrowScaleGirl11242	242	264	10
OverhandthrowScaleGirl11	OverhandthrowScaleGirl11265	265	276	11
OverhandthrowScaleGirl11	OverhandthrowScaleGirl11277	277	287	12
OverhandthrowScaleGirl11	OverhandthrowScaleGirl11288	288	312	13
OverhandthrowScaleGirl11	OverhandthrowScaleGirl11313	313	324	14
OverhandthrowScaleGirl11	OverhandthrowScaleGirl11325	325	336	15
OverhandthrowScaleGirl11	OverhandthrowScaleGirl11337	337	356	16
OverhandthrowScaleGirl11	OverhandthrowScaleGirl11357	357	365	17
OverhandthrowScaleGirl12	OverhandthrowScaleGirl120	0	181	4
OverhandthrowScaleGirl12	OverhandthrowScaleGirl12182	182	197	5
OverhandthrowScaleGirl12	OverhandthrowScaleGirl12198	198	216	6
OverhandthrowScaleGirl12	OverhandthrowScaleGirl12217	217	243	7
OverhandthrowScaleGirl12	OverhandthrowScaleGirl12244	244	258	8
OverhandthrowScaleGirl12	OverhandthrowScaleGirl12259	259	273	9
OverhandthrowScaleGirl12	OverhandthrowScaleGirl12274	274	302	10
OverhandthrowScaleGirl12	OverhandthrowScaleGirl12303	303	319	11
OverhandthrowScaleGirl12	OverhandthrowScaleGirl12320	320	330	12
OverhandthrowScaleGirl12	OverhandthrowScaleGirl12331	331	350	13
OverhandthrowScaleGirl12	OverhandthrowScaleGirl12351	351	369	14
OverhandthrowScaleGirl12	OverhandthrowScaleGirl12370	370	385	15
OverhandthrowScaleGirl12	OverhandthrowScaleGirl12386	386	400	16
OverhandthrowScaleGirl12	OverhandthrowScaleGirl12401	401	430	17
SideJumpScaleBoy06	SideJumpScaleBoy60	0		1
SideJumpScaleBoy06	SideJumpScaleBoy61	1	8	4
SideJumpScaleBoy06	SideJumpScaleBoy69	9		6
SideJumpScaleBoy06	SideJumpScaleBoy610	10	11	7
SideJumpScaleBoy06	SideJumpScaleBoy612	12		8
SideJumpScaleBoy06	SideJumpScaleBoy613	13		9
SideJumpScaleBoy06	SideJumpScaleBoy614	14	15	10
SideJumpScaleBoy06	SideJumpScaleBoy616	16		11
SideJumpScaleBoy06	SideJumpScaleBoy617	17		12
SideJumpScaleBoy06	SideJumpScaleBoy618	18	19	13
SideJumpScaleBoy06	SideJumpScaleBoy620	20	21	15
SideJumpScaleBoy06	SideJumpScaleBoy622	22	23	16
SideJumpScaleBoy06	SideJumpScaleBoy624	24		18
SideJumpScaleBoy06	SideJumpScaleBoy625	25		19
SideJumpScaleBoy07	SideJumpScaleBoy70	0		1
SideJumpScaleBoy07	SideJumpScaleBoy71	1	5	3
SideJumpScaleBoy07	SideJumpScaleBoy76	6	7	4
SideJumpScaleBoy07	SideJumpScaleBoy78	8	9	5
SideJumpScaleBoy07	SideJumpScaleBoy710	10		6
SideJumpScaleBoy07	SideJumpScaleBoy711	11	12	7
SideJumpScaleBoy07	SideJumpScaleBoy713	13		8
SideJumpScaleBoy07	SideJumpScaleBoy714	14		9
SideJumpScaleBoy07	SideJumpScaleBoy715	15	16	10
SideJumpScaleBoy07	SideJumpScaleBoy717	17		11
SideJumpScaleBoy07	SideJumpScaleBoy718	18		12
SideJumpScaleBoy07	SideJumpScaleBoy719	19	20	13
SideJumpScaleBoy07	SideJumpScaleBoy721	21		14
SideJumpScaleBoy07	SideJumpScaleBoy722	22		15
SideJumpScaleBoy07	SideJumpScaleBoy723	23	24	16
SideJumpScaleBoy07	SideJumpScaleBoy725	25	26	17
SideJumpScaleBoy07	SideJumpScaleBoy727	27	32	19
SideJumpScaleBoy08	SideJumpScaleBoy80	0	10	4
SideJumpScaleBoy08	SideJumpScaleBoy811	11	12	5
SideJumpScaleBoy08	SideJumpScaleBoy813	13		6
SideJumpScaleBoy08	SideJumpScaleBoy814	14	15	7
SideJumpScaleBoy08	SideJumpScaleBoy816	16		8
SideJumpScaleBoy08	SideJumpScaleBoy817	17		9
SideJumpScaleBoy08	SideJumpScaleBoy818	18	20	10
SideJumpScaleBoy08	SideJumpScaleBoy821	21		11
SideJumpScaleBoy08	SideJumpScaleBoy822	22		12
SideJumpScaleBoy08	SideJumpScaleBoy823	23	24	13
SideJumpScaleBoy08	SideJumpScaleBoy825	25	26	14
SideJumpScaleBoy08	SideJumpScaleBoy827	27		15
SideJumpScaleBoy08	SideJumpScaleBoy828	28	29	16
SideJumpScaleBoy08	SideJumpScaleBoy830	30		17
SideJumpScaleBoy08	SideJumpScaleBoy831	31		18
SideJumpScaleBoy08	SideJumpScaleBoy832	32	34	19
SideJumpScaleBoy09	SideJumpScaleBoy90	0	12	4
SideJumpScaleBoy09	SideJumpScaleBoy913	13		5
SideJumpScaleBoy09	SideJumpScaleBoy914	14	15	6
SideJumpScaleBoy09	SideJumpScaleBoy916	16	17	7
SideJumpScaleBoy09	SideJumpScaleBoy918	18	19	8
SideJumpScaleBoy09	SideJumpScaleBoy920	20		9
SideJumpScaleBoy09	SideJumpScaleBoy921	21	22	10
SideJumpScaleBoy09	SideJumpScaleBoy923	23	24	11
SideJumpScaleBoy09	SideJumpScaleBoy925	25		12
SideJumpScaleBoy09	SideJumpScaleBoy926	26	28	13
SideJumpScaleBoy09	SideJumpScaleBoy929	29		14
SideJumpScaleBoy09	SideJumpScaleBoy930	30		15
SideJumpScaleBoy09	SideJumpScaleBoy931	31	33	16
SideJumpScaleBoy09	SideJumpScaleBoy934	34		17
SideJumpScaleBoy09	SideJumpScaleBoy935	35	37	19
SideJumpScaleBoy10	SideJumpScaleBoy100	0	7	2
SideJumpScaleBoy10	SideJumpScaleBoy108	8	12	4
SideJumpScaleBoy10	SideJumpScaleBoy1013	13	14	5
SideJumpScaleBoy10	SideJumpScaleBoy1015	15	16	6
SideJumpScaleBoy10	SideJumpScaleBoy1017	17	19	7
SideJumpScaleBoy10	SideJumpScaleBoy1020	20	21	8
SideJumpScaleBoy10	SideJumpScaleBoy1022	22		9
SideJumpScaleBoy10	SideJumpScaleBoy1023	23	25	10
SideJumpScaleBoy10	SideJumpScaleBoy1026	26	27	11
SideJumpScaleBoy10	SideJumpScaleBoy1028	28	29	12
SideJumpScaleBoy10	SideJumpScaleBoy1030	30	32	13
SideJumpScaleBoy10	SideJumpScaleBoy1033	33	34	14
SideJumpScaleBoy10	SideJumpScaleBoy1035	35		15
SideJumpScaleBoy10	SideJumpScaleBoy1036	36	37	16
SideJumpScaleBoy10	SideJumpScaleBoy1038	38	40	17
SideJumpScaleBoy10	SideJumpScaleBoy1041	41	60	19
SideJumpScaleBoy11	SideJumpScaleBoy110	0	12	2
SideJumpScaleBoy11	SideJumpScaleBoy1113	13	14	3
SideJumpScaleBoy11	SideJumpScaleBoy1115	15	17	4
SideJumpScaleBoy11	SideJumpScaleBoy1118	18	20	6
SideJumpScaleBoy11	SideJumpScaleBoy1121	21	23	7
SideJumpScaleBoy11	SideJumpScaleBoy1124	24		8
SideJumpScaleBoy11	SideJumpScaleBoy1125	25	26	9
SideJumpScaleBoy11	SideJumpScaleBoy1127	27	29	10
SideJumpScaleBoy11	SideJumpScaleBoy1130	30	31	11
SideJumpScaleBoy11	SideJumpScaleBoy1132	32		12
SideJumpScaleBoy11	SideJumpScaleBoy1133	33	35	13
SideJumpScaleBoy11	SideJumpScaleBoy1136	36	37	14
SideJumpScaleBoy11	SideJumpScaleBoy1138	38		15
SideJumpScaleBoy11	SideJumpScaleBoy1139	39	41	16
SideJumpScaleBoy11	SideJumpScaleBoy1142	42		17
SideJumpScaleBoy11	SideJumpScaleBoy1143	43	49	19
SideJumpScaleBoy12	SideJumpScaleBoy120	0	2	1
SideJumpScaleBoy12	SideJumpScaleBoy123	3	13	2
SideJumpScaleBoy12	SideJumpScaleBoy1214	14	17	4
SideJumpScaleBoy12	SideJumpScaleBoy1218	18	19	5
SideJumpScaleBoy12	SideJumpScaleBoy1220	20	21	6
SideJumpScaleBoy12	SideJumpScaleBoy1222	22	24	7
SideJumpScaleBoy12	SideJumpScaleBoy1225	25		8
SideJumpScaleBoy12	SideJumpScaleBoy1226	26	27	9
SideJumpScaleBoy12	SideJumpScaleBoy1228	28	30	10
SideJumpScaleBoy12	SideJumpScaleBoy1231	31		11
SideJumpScaleBoy12	SideJumpScaleBoy1232	32	33	12
SideJumpScaleBoy12	SideJumpScaleBoy1234	34	35	13
SideJumpScaleBoy12	SideJumpScaleBoy1236	36	37	14
SideJumpScaleBoy12	SideJumpScaleBoy1238	38		15
SideJumpScaleBoy12	SideJumpScaleBoy1239	39	40	16
SideJumpScaleGirl06	SideJumpScaleGirl60	0		1
SideJumpScaleGirl06	SideJumpScaleGirl61	1	8	4
SideJumpScaleGirl06	SideJumpScaleGirl69	9		5
SideJumpScaleGirl06	SideJumpScaleGirl610	10		6
SideJumpScaleGirl06	SideJumpScaleGirl611	11	12	7
SideJumpScaleGirl06	SideJumpScaleGirl613	13		8
SideJumpScaleGirl06	SideJumpScaleGirl614	14		9
SideJumpScaleGirl06	SideJumpScaleGirl615	15	16	10
SideJumpScaleGirl06	SideJumpScaleGirl617	17		11
SideJumpScaleGirl06	SideJumpScaleGirl618	18		12
SideJumpScaleGirl06	SideJumpScaleGirl619	19	20	13
SideJumpScaleGirl06	SideJumpScaleGirl621	21		14
SideJumpScaleGirl06	SideJumpScaleGirl622	22		15
SideJumpScaleGirl06	SideJumpScaleGirl623	23	24	16
SideJumpScaleGirl07	SideJumpScaleGirl70	0	3	1
SideJumpScaleGirl07	SideJumpScaleGirl74	4		2
SideJumpScaleGirl07	SideJumpScaleGirl75	5	7	4
SideJumpScaleGirl07	SideJumpScaleGirl78	8	9	5
SideJumpScaleGirl07	SideJumpScaleGirl710	10		6
SideJumpScaleGirl07	SideJumpScaleGirl711	11	13	7
SideJumpScaleGirl07	SideJumpScaleGirl714	14		8
SideJumpScaleGirl07	SideJumpScaleGirl715	15		9
SideJumpScaleGirl07	SideJumpScaleGirl716	16	17	10
SideJumpScaleGirl07	SideJumpScaleGirl718	18	19	11
SideJumpScaleGirl07	SideJumpScaleGirl720	20		12
SideJumpScaleGirl07	SideJumpScaleGirl721	21	22	13
SideJumpScaleGirl07	SideJumpScaleGirl723	23		14
SideJumpScaleGirl07	SideJumpScaleGirl724	24	25	15
SideJumpScaleGirl07	SideJumpScaleGirl726	26	27	16
SideJumpScaleGirl07	SideJumpScaleGirl728	28		17
SideJumpScaleGirl07	SideJumpScaleGirl729	29	36	19
SideJumpScaleGirl08	SideJumpScaleGirl80	0	2	1
SideJumpScaleGirl08	SideJumpScaleGirl83	3	7	3
SideJumpScaleGirl08	SideJumpScaleGirl88	8	10	4
SideJumpScaleGirl08	SideJumpScaleGirl811	11		5
SideJumpScaleGirl08	SideJumpScaleGirl812	12	13	6
SideJumpScaleGirl08	SideJumpScaleGirl814	14	15	7
SideJumpScaleGirl08	SideJumpScaleGirl816	16	17	8
SideJumpScaleGirl08	SideJumpScaleGirl818	18		9
SideJumpScaleGirl08	SideJumpScaleGirl819	19	21	10
SideJumpScaleGirl08	SideJumpScaleGirl822	22		11
SideJumpScaleGirl08	SideJumpScaleGirl823	23		12
SideJumpScaleGirl08	SideJumpScaleGirl824	24	26	13
SideJumpScaleGirl08	SideJumpScaleGirl827	27		14
SideJumpScaleGirl08	SideJumpScaleGirl828	28	29	15
SideJumpScaleGirl08	SideJumpScaleGirl830	30	31	16
SideJumpScaleGirl08	SideJumpScaleGirl832	32	33	17
SideJumpScaleGirl08	SideJumpScaleGirl834	34		18
SideJumpScaleGirl08	SideJumpScaleGirl835	35	41	19
SideJumpScaleGirl09	SideJumpScaleGirl90	0	3	1
SideJumpScaleGirl09	SideJumpScaleGirl94	4	7	2
SideJumpScaleGirl09	SideJumpScaleGirl98	8	12	4
SideJumpScaleGirl09	SideJumpScaleGirl913	13		5
SideJumpScaleGirl09	SideJumpScaleGirl914	14	15	6
SideJumpScaleGirl09	SideJumpScaleGirl916	16	18	7
SideJumpScaleGirl09	SideJumpScaleGirl919	19		8
SideJumpScaleGirl09	SideJumpScaleGirl920	20	21	9
SideJumpScaleGirl09	SideJumpScaleGirl922	22	24	10
SideJumpScaleGirl09	SideJumpScaleGirl925	25	26	11
SideJumpScaleGirl09	SideJumpScaleGirl927	27		12
SideJumpScaleGirl09	SideJumpScaleGirl928	28	30	13
SideJumpScaleGirl09	SideJumpScaleGirl931	31	32	14
SideJumpScaleGirl09	SideJumpScaleGirl933	33		15
SideJumpScaleGirl09	SideJumpScaleGirl934	34	36	16
SideJumpScaleGirl09	SideJumpScaleGirl937	37	38	17
SideJumpScaleGirl09	SideJumpScaleGirl939	39	40	19
SideJumpScaleGirl10	SideJumpScaleGirl100	0	4	1
SideJumpScaleGirl10	SideJumpScaleGirl105	5	8	2
SideJumpScaleGirl10	SideJumpScaleGirl109	9	14	4
SideJumpScaleGirl10	SideJumpScaleGirl1015	15		5
SideJumpScaleGirl10	SideJumpScaleGirl1016	16	17	6
SideJumpScaleGirl10	SideJumpScaleGirl1018	18	20	7
SideJumpScaleGirl10	SideJumpScaleGirl1021	21	22	8
SideJumpScaleGirl10	SideJumpScaleGirl1023	23		9
SideJumpScaleGirl10	SideJumpScaleGirl1024	24	26	10
SideJumpScaleGirl10	SideJumpScaleGirl1027	27	28	11
SideJumpScaleGirl10	SideJumpScaleGirl1029	29		12
SideJumpScaleGirl10	SideJumpScaleGirl1030	30	33	13
SideJumpScaleGirl10	SideJumpScaleGirl1034	34		14
SideJumpScaleGirl10	SideJumpScaleGirl1035	35	36	15
SideJumpScaleGirl10	SideJumpScaleGirl1037	37		16
SideJumpScaleGirl10	SideJumpScaleGirl1038	38	52	19
SideJumpScaleGirl11	SideJumpScaleGirl110	0	9	1
SideJumpScaleGirl11	SideJumpScaleGirl1110	10	17	4
SideJumpScaleGirl11	SideJumpScaleGirl1118	18	19	5
SideJumpScaleGirl11	SideJumpScaleGirl1120	20	21	6
SideJumpScaleGirl11	SideJumpScaleGirl1122	22	24	7
SideJumpScaleGirl11	SideJumpScaleGirl1125	25		8
SideJumpScaleGirl11	SideJumpScaleGirl1126	26	27	9
SideJumpScaleGirl11	SideJumpScaleGirl1128	28	30	10
SideJumpScaleGirl11	SideJumpScaleGirl1131	31	32	11
SideJumpScaleGirl11	SideJumpScaleGirl1133	33		12
SideJumpScaleGirl11	SideJumpScaleGirl1134	34	36	13
SideJumpScaleGirl11	SideJumpScaleGirl1137	37	38	14
SideJumpScaleGirl11	SideJumpScaleGirl1139	39		15
SideJumpScaleGirl11	SideJumpScaleGirl1140	40	41	16
SideJumpScaleGirl11	SideJumpScaleGirl1142	42	44	17
SideJumpScaleGirl11	SideJumpScaleGirl1145	45	46	18
SideJumpScaleGirl12	SideJumpScaleGirl120	0	17	2
SideJumpScaleGirl12	SideJumpScaleGirl1218	18		3
SideJumpScaleGirl12	SideJumpScaleGirl1219	19	20	4
SideJumpScaleGirl12	SideJumpScaleGirl1221	21	22	5
SideJumpScaleGirl12	SideJumpScaleGirl1223	23	24	6
SideJumpScaleGirl12	SideJumpScaleGirl1225	25	26	7
SideJumpScaleGirl12	SideJumpScaleGirl1227	27	28	8
SideJumpScaleGirl12	SideJumpScaleGirl1229	29		9
SideJumpScaleGirl12	SideJumpScaleGirl1230	30	32	10
SideJumpScaleGirl12	SideJumpScaleGirl1233	33	34	11
SideJumpScaleGirl12	SideJumpScaleGirl1235	35		12
SideJumpScaleGirl12	SideJumpScaleGirl1236	36	38	13
SideJumpScaleGirl12	SideJumpScaleGirl1239	39		14
SideJumpScaleGirl12	SideJumpScaleGirl1240	40	42	16
SideJumpScaleGirl12	SideJumpScaleGirl1241	41	46	18
StaticBalanceScaleBoy06	StaticBalanceScaleBoy60	0		3
StaticBalanceScaleBoy06	StaticBalanceScaleBoy61	1	8	4
StaticBalanceScaleBoy06	StaticBalanceScaleBoy68	8	16	5
StaticBalanceScaleBoy06	StaticBalanceScaleBoy617	17	21	6
StaticBalanceScaleBoy06	StaticBalanceScaleBoy622	22	30	7
StaticBalanceScaleBoy06	StaticBalanceScaleBoy631	31	35	8
StaticBalanceScaleBoy06	StaticBalanceScaleBoy636	36	39	9
StaticBalanceScaleBoy06	StaticBalanceScaleBoy640	40	47	10
StaticBalanceScaleBoy06	StaticBalanceScaleBoy648	48	53	11
StaticBalanceScaleBoy06	StaticBalanceScaleBoy654	54	58	12
StaticBalanceScaleBoy06	StaticBalanceScaleBoy659	59	60	13
StaticBalanceScaleBoy07	StaticBalanceScaleBoy70	0	18	1
StaticBalanceScaleBoy07	StaticBalanceScaleBoy719	19		2
StaticBalanceScaleBoy07	StaticBalanceScaleBoy720	20	24	3
StaticBalanceScaleBoy07	StaticBalanceScaleBoy725	25	30	4
StaticBalanceScaleBoy07	StaticBalanceScaleBoy731	31	33	5
StaticBalanceScaleBoy07	StaticBalanceScaleBoy734	34	36	6
StaticBalanceScaleBoy07	StaticBalanceScaleBoy737	37	43	7
StaticBalanceScaleBoy07	StaticBalanceScaleBoy744	44	46	8
StaticBalanceScaleBoy07	StaticBalanceScaleBoy747	47	49	9
StaticBalanceScaleBoy07	StaticBalanceScaleBoy750	50	55	10
StaticBalanceScaleBoy07	StaticBalanceScaleBoy756	56	59	11
StaticBalanceScaleBoy07	StaticBalanceScaleBoy760	60		12
StaticBalanceScaleBoy08	StaticBalanceScaleBoy80	0	16	1
StaticBalanceScaleBoy08	StaticBalanceScaleBoy817	17	27	2
StaticBalanceScaleBoy08	StaticBalanceScaleBoy828	28		3
StaticBalanceScaleBoy08	StaticBalanceScaleBoy829	29	35	4
StaticBalanceScaleBoy08	StaticBalanceScaleBoy836	36	38	5
StaticBalanceScaleBoy08	StaticBalanceScaleBoy839	39	40	6
StaticBalanceScaleBoy08	StaticBalanceScaleBoy841	41	45	7
StaticBalanceScaleBoy08	StaticBalanceScaleBoy846	46	48	8
StaticBalanceScaleBoy08	StaticBalanceScaleBoy849	49	51	9
StaticBalanceScaleBoy08	StaticBalanceScaleBoy852	52	56	10
StaticBalanceScaleBoy08	StaticBalanceScaleBoy857	57	60	11
StaticBalanceScaleBoy09	StaticBalanceScaleBoy90	0	20	1
StaticBalanceScaleBoy09	StaticBalanceScaleBoy921	21	34	3
StaticBalanceScaleBoy09	StaticBalanceScaleBoy935	35	38	4
StaticBalanceScaleBoy09	StaticBalanceScaleBoy939	39	40	5
StaticBalanceScaleBoy09	StaticBalanceScaleBoy941	41	44	6
StaticBalanceScaleBoy09	StaticBalanceScaleBoy945	45	48	7
StaticBalanceScaleBoy09	StaticBalanceScaleBoy949	49	51	8
StaticBalanceScaleBoy09	StaticBalanceScaleBoy952	52	53	9
StaticBalanceScaleBoy09	StaticBalanceScaleBoy954	54	57	10
StaticBalanceScaleBoy09	StaticBalanceScaleBoy958	58	60	11
StaticBalanceScaleBoy10	StaticBalanceScaleBoy100	0	31	1
StaticBalanceScaleBoy10	StaticBalanceScaleBoy1032	32	36	2
StaticBalanceScaleBoy10	StaticBalanceScaleBoy1037	37	41	4
StaticBalanceScaleBoy10	StaticBalanceScaleBoy1042	42	44	5
StaticBalanceScaleBoy10	StaticBalanceScaleBoy1045	45		6
StaticBalanceScaleBoy10	StaticBalanceScaleBoy1046	46	49	7
StaticBalanceScaleBoy10	StaticBalanceScaleBoy1050	50	51	8
StaticBalanceScaleBoy10	StaticBalanceScaleBoy1052	52	54	9
StaticBalanceScaleBoy10	StaticBalanceScaleBoy1055	55	58	10
StaticBalanceScaleBoy10	StaticBalanceScaleBoy1059	59	60	11
StaticBalanceScaleBoy11	StaticBalanceScaleBoy110	0	42	1
StaticBalanceScaleBoy11	StaticBalanceScaleBoy1143	43	51	4
StaticBalanceScaleBoy11	StaticBalanceScaleBoy1152	52	53	5
StaticBalanceScaleBoy11	StaticBalanceScaleBoy1154	54		6
StaticBalanceScaleBoy11	StaticBalanceScaleBoy1155	55		7
StaticBalanceScaleBoy11	StaticBalanceScaleBoy1156	56		8
StaticBalanceScaleBoy11	StaticBalanceScaleBoy1157	57	59	10
StaticBalanceScaleBoy11	StaticBalanceScaleBoy1160	60		11
StaticBalanceScaleBoy12	StaticBalanceScaleBoy120	0	11	1
StaticBalanceScaleBoy12	StaticBalanceScaleBoy1212	12	50	5
StaticBalanceScaleBoy12	StaticBalanceScaleBoy1251	51	54	7
StaticBalanceScaleBoy12	StaticBalanceScaleBoy1255	55		8
StaticBalanceScaleBoy12	StaticBalanceScaleBoy1256	56	57	9
StaticBalanceScaleBoy12	StaticBalanceScaleBoy1258	58	60	10
StaticBalanceScaleGirl06	StaticBalanceScaleGirl60	0		1
StaticBalanceScaleGirl06	StaticBalanceScaleGirl61	1	19	4
StaticBalanceScaleGirl06	StaticBalanceScaleGirl620	20	24	5
StaticBalanceScaleGirl06	StaticBalanceScaleGirl625	25	28	6
StaticBalanceScaleGirl06	StaticBalanceScaleGirl629	29	36	7
StaticBalanceScaleGirl06	StaticBalanceScaleGirl637	37	40	8
StaticBalanceScaleGirl06	StaticBalanceScaleGirl641	41	45	9
StaticBalanceScaleGirl06	StaticBalanceScaleGirl646	46	53	10
StaticBalanceScaleGirl06	StaticBalanceScaleGirl654	54	57	11
StaticBalanceScaleGirl06	StaticBalanceScaleGirl658	58	60	12
StaticBalanceScaleGirl07	StaticBalanceScaleGirl70	0	18	1
StaticBalanceScaleGirl07	StaticBalanceScaleGirl719	19	22	2
StaticBalanceScaleGirl07	StaticBalanceScaleGirl723	23	27	3
StaticBalanceScaleGirl07	StaticBalanceScaleGirl728	28	32	4
StaticBalanceScaleGirl07	StaticBalanceScaleGirl733	33	35	5
StaticBalanceScaleGirl07	StaticBalanceScaleGirl736	36	38	6
StaticBalanceScaleGirl07	StaticBalanceScaleGirl739	39	44	7
StaticBalanceScaleGirl07	StaticBalanceScaleGirl745	45	47	8
StaticBalanceScaleGirl07	StaticBalanceScaleGirl748	48	49	9
StaticBalanceScaleGirl07	StaticBalanceScaleGirl750	50	55	10
StaticBalanceScaleGirl07	StaticBalanceScaleGirl756	56	58	11
StaticBalanceScaleGirl07	StaticBalanceScaleGirl759	59	60	12
StaticBalanceScaleGirl08	StaticBalanceScaleGirl80	0	33	1
StaticBalanceScaleGirl08	StaticBalanceScaleGirl834	34	35	2
StaticBalanceScaleGirl08	StaticBalanceScaleGirl836	36	37	3
StaticBalanceScaleGirl08	StaticBalanceScaleGirl838	38	41	4
StaticBalanceScaleGirl08	StaticBalanceScaleGirl842	42	44	5
StaticBalanceScaleGirl08	StaticBalanceScaleGirl845	45		6
StaticBalanceScaleGirl08	StaticBalanceScaleGirl846	46	49	7
StaticBalanceScaleGirl08	StaticBalanceScaleGirl850	50	52	8
StaticBalanceScaleGirl08	StaticBalanceScaleGirl853	53	54	9
StaticBalanceScaleGirl08	StaticBalanceScaleGirl855	55	58	10
StaticBalanceScaleGirl08	StaticBalanceScaleGirl859	59	60	11
StaticBalanceScaleGirl09	StaticBalanceScaleGirl90	0	33	1
StaticBalanceScaleGirl09	StaticBalanceScaleGirl934	34	35	2
StaticBalanceScaleGirl09	StaticBalanceScaleGirl936	36	38	3
StaticBalanceScaleGirl09	StaticBalanceScaleGirl939	39	40	4
StaticBalanceScaleGirl09	StaticBalanceScaleGirl941	41	43	5
StaticBalanceScaleGirl09	StaticBalanceScaleGirl944	44	45	6
StaticBalanceScaleGirl09	StaticBalanceScaleGirl946	46	50	7
StaticBalanceScaleGirl09	StaticBalanceScaleGirl951	51	52	8
StaticBalanceScaleGirl09	StaticBalanceScaleGirl953	53		9
StaticBalanceScaleGirl09	StaticBalanceScaleGirl954	54	57	10
StaticBalanceScaleGirl09	StaticBalanceScaleGirl958	58	60	11
StaticBalanceScaleGirl10	StaticBalanceScaleGirl100	0	37	1
StaticBalanceScaleGirl10	StaticBalanceScaleGirl1038	38	39	3
StaticBalanceScaleGirl10	StaticBalanceScaleGirl1040	40	43	4
StaticBalanceScaleGirl10	StaticBalanceScaleGirl1044	44	46	5
StaticBalanceScaleGirl10	StaticBalanceScaleGirl1047	47		6
StaticBalanceScaleGirl10	StaticBalanceScaleGirl1048	48	50	7
StaticBalanceScaleGirl10	StaticBalanceScaleGirl1051	51	52	8
StaticBalanceScaleGirl10	StaticBalanceScaleGirl1053	53		9
StaticBalanceScaleGirl10	StaticBalanceScaleGirl1054	54	58	10
StaticBalanceScaleGirl10	StaticBalanceScaleGirl1059	59	60	11
StaticBalanceScaleGirl11	StaticBalanceScaleGirl110	0	51	1
StaticBalanceScaleGirl11	StaticBalanceScaleGirl1152	52	54	4
StaticBalanceScaleGirl11	StaticBalanceScaleGirl1155	55	56	6
StaticBalanceScaleGirl11	StaticBalanceScaleGirl1157	57		8
StaticBalanceScaleGirl11	StaticBalanceScaleGirl1158	58		9
StaticBalanceScaleGirl11	StaticBalanceScaleGirl1159	59		10
StaticBalanceScaleGirl11	StaticBalanceScaleGirl1160	60		11
StaticBalanceScaleGirl12	StaticBalanceScaleGirl120	0	39	1
StaticBalanceScaleGirl12	StaticBalanceScaleGirl1240	40	48	4
StaticBalanceScaleGirl12	StaticBalanceScaleGirl1249	49	51	6
StaticBalanceScaleGirl12	StaticBalanceScaleGirl1252	52	54	7
StaticBalanceScaleGirl12	StaticBalanceScaleGirl1255	55	56	9
StaticBalanceScaleGirl12	StaticBalanceScaleGirl1257	57	60	10
ThrowScaleBoy06	ThrowScaleBoy60	0	2	3
ThrowScaleBoy06	ThrowScaleBoy63	3	5	4
ThrowScaleBoy06	ThrowScaleBoy66	6	10	5
ThrowScaleBoy06	ThrowScaleBoy611	11	13	6
ThrowScaleBoy06	ThrowScaleBoy614	14	19	7
ThrowScaleBoy06	ThrowScaleBoy620	20	22	8
ThrowScaleBoy06	ThrowScaleBoy623	23	25	9
ThrowScaleBoy06	ThrowScaleBoy626	26	31	10
ThrowScaleBoy06	ThrowScaleBoy632	32	34	11
ThrowScaleBoy06	ThrowScaleBoy635	35	36	12
ThrowScaleBoy06	ThrowScaleBoy637	37	42	13
ThrowScaleBoy06	ThrowScaleBoy643	43	45	14
ThrowScaleBoy06	ThrowScaleBoy646	46	50	15
ThrowScaleBoy07	ThrowScaleBoy70	0	1	2
ThrowScaleBoy07	ThrowScaleBoy72	2	4	3
ThrowScaleBoy07	ThrowScaleBoy75	5	10	4
ThrowScaleBoy07	ThrowScaleBoy711	11	13	5
ThrowScaleBoy07	ThrowScaleBoy714	14	17	6
ThrowScaleBoy07	ThrowScaleBoy718	18	23	7
ThrowScaleBoy07	ThrowScaleBoy724	24	26	8
ThrowScaleBoy07	ThrowScaleBoy727	27	29	9
ThrowScaleBoy07	ThrowScaleBoy730	30	35	10
ThrowScaleBoy07	ThrowScaleBoy736	36	39	11
ThrowScaleBoy07	ThrowScaleBoy740	40	41	12
ThrowScaleBoy07	ThrowScaleBoy742	42	47	13
ThrowScaleBoy07	ThrowScaleBoy748	48	50	14
ThrowScaleBoy08	ThrowScaleBoy80	0	6	1
ThrowScaleBoy08	ThrowScaleBoy87	7	13	2
ThrowScaleBoy08	ThrowScaleBoy814	14	15	3
ThrowScaleBoy08	ThrowScaleBoy816	16	21	4
ThrowScaleBoy08	ThrowScaleBoy822	22	23	5
ThrowScaleBoy08	ThrowScaleBoy824	24	26	6
ThrowScaleBoy08	ThrowScaleBoy827	27	31	7
ThrowScaleBoy08	ThrowScaleBoy832	32	33	8
ThrowScaleBoy08	ThrowScaleBoy834	34	36	9
ThrowScaleBoy08	ThrowScaleBoy837	37	41	10
ThrowScaleBoy08	ThrowScaleBoy842	42	44	11
ThrowScaleBoy08	ThrowScaleBoy845	45	46	12
ThrowScaleBoy08	ThrowScaleBoy847	47	50	13
ThrowScaleBoy09	ThrowScaleBoy90	0	20	1
ThrowScaleBoy09	ThrowScaleBoy921	21	22	2
ThrowScaleBoy09	ThrowScaleBoy923	23	28	4
ThrowScaleBoy09	ThrowScaleBoy929	29	30	5
ThrowScaleBoy09	ThrowScaleBoy931	31	32	6
ThrowScaleBoy09	ThrowScaleBoy933	33	35	7
ThrowScaleBoy09	ThrowScaleBoy936	36	38	8
ThrowScaleBoy09	ThrowScaleBoy939	39	40	9
ThrowScaleBoy09	ThrowScaleBoy941	41	44	10
ThrowScaleBoy09	ThrowScaleBoy945	45	46	11
ThrowScaleBoy09	ThrowScaleBoy947	47	48	12
ThrowScaleBoy09	ThrowScaleBoy949	49	50	13
ThrowScaleBoy10	ThrowScaleBoy100	0	19	1
ThrowScaleBoy10	ThrowScaleBoy1020	20	25	2
ThrowScaleBoy10	ThrowScaleBoy1026	26	27	3
ThrowScaleBoy10	ThrowScaleBoy1028	28	31	4
ThrowScaleBoy10	ThrowScaleBoy1032	32	33	5
ThrowScaleBoy10	ThrowScaleBoy1034	34	35	6
ThrowScaleBoy10	ThrowScaleBoy1036	36	39	7
ThrowScaleBoy10	ThrowScaleBoy1040	40	41	8
ThrowScaleBoy10	ThrowScaleBoy1042	42		9
ThrowScaleBoy10	ThrowScaleBoy1043	43	46	10
ThrowScaleBoy10	ThrowScaleBoy1047	47	48	11
ThrowScaleBoy10	ThrowScaleBoy1049	49		12
ThrowScaleBoy10	ThrowScaleBoy1050	50		13
ThrowScaleBoy11	ThrowScaleBoy110	0	33	1
ThrowScaleBoy11	ThrowScaleBoy1134	34	40	2
ThrowScaleBoy11	ThrowScaleBoy1141	41		4
ThrowScaleBoy11	ThrowScaleBoy1142	42	43	5
ThrowScaleBoy11	ThrowScaleBoy1144	44	45	7
ThrowScaleBoy11	ThrowScaleBoy1146	46		8
ThrowScaleBoy11	ThrowScaleBoy1147	47		9
ThrowScaleBoy11	ThrowScaleBoy1148	48		10
ThrowScaleBoy11	ThrowScaleBoy1149	49		11
ThrowScaleBoy11	ThrowScaleBoy1150	50		12
ThrowScaleBoy12	ThrowScaleBoy120	0	24	1
ThrowScaleBoy12	ThrowScaleBoy1225	25	40	6
ThrowScaleBoy12	ThrowScaleBoy1241	41	43	7
ThrowScaleBoy12	ThrowScaleBoy1244	44	46	9
ThrowScaleBoy12	ThrowScaleBoy1247	47	48	10
ThrowScaleBoy12	ThrowScaleBoy1249	49	50	11
ThrowScaleGirl06	ThrowScaleGirl60	0	3	5
ThrowScaleGirl06	ThrowScaleGirl64	4	6	6
ThrowScaleGirl06	ThrowScaleGirl67	7	13	7
ThrowScaleGirl06	ThrowScaleGirl614	14	17	8
ThrowScaleGirl06	ThrowScaleGirl618	18	20	9
ThrowScaleGirl06	ThrowScaleGirl621	21	26	10
ThrowScaleGirl06	ThrowScaleGirl627	27	31	11
ThrowScaleGirl06	ThrowScaleGirl632	32	34	12
ThrowScaleGirl06	ThrowScaleGirl635	35	41	13
ThrowScaleGirl06	ThrowScaleGirl642	42	45	14
ThrowScaleGirl06	ThrowScaleGirl646	46	47	15
ThrowScaleGirl06	ThrowScaleGirl648	48	50	16
ThrowScaleGirl07	ThrowScaleGirl70	0	1	3
ThrowScaleGirl07	ThrowScaleGirl72	2	8	4
ThrowScaleGirl07	ThrowScaleGirl79	9	11	5
ThrowScaleGirl07	ThrowScaleGirl712	12	15	6
ThrowScaleGirl07	ThrowScaleGirl716	16	21	7
ThrowScaleGirl07	ThrowScaleGirl722	22	24	8
ThrowScaleGirl07	ThrowScaleGirl725	25	28	9
ThrowScaleGirl07	ThrowScaleGirl729	29	34	10
ThrowScaleGirl07	ThrowScaleGirl735	35	38	11
ThrowScaleGirl07	ThrowScaleGirl739	39	41	12
ThrowScaleGirl07	ThrowScaleGirl742	42	47	13
ThrowScaleGirl07	ThrowScaleGirl748	48	50	14
ThrowScaleGirl08	ThrowScaleGirl80	0	3	1
ThrowScaleGirl08	ThrowScaleGirl84	4	5	2
ThrowScaleGirl08	ThrowScaleGirl86	6	9	3
ThrowScaleGirl08	ThrowScaleGirl810	10	14	4
ThrowScaleGirl08	ThrowScaleGirl815	15	17	5
ThrowScaleGirl08	ThrowScaleGirl818	18	20	6
ThrowScaleGirl08	ThrowScaleGirl821	21	25	7
ThrowScaleGirl08	ThrowScaleGirl826	26	28	8
ThrowScaleGirl08	ThrowScaleGirl829	29	31	9
ThrowScaleGirl08	ThrowScaleGirl832	32	36	10
ThrowScaleGirl08	ThrowScaleGirl837	37	40	11
ThrowScaleGirl08	ThrowScaleGirl841	41	42	12
ThrowScaleGirl08	ThrowScaleGirl843	43	48	13
ThrowScaleGirl08	ThrowScaleGirl849	49	50	14
ThrowScaleGirl09	ThrowScaleGirl90	0	14	1
ThrowScaleGirl09	ThrowScaleGirl915	15	24	4
ThrowScaleGirl09	ThrowScaleGirl925	25	27	5
ThrowScaleGirl09	ThrowScaleGirl928	28	29	6
ThrowScaleGirl09	ThrowScaleGirl930	30	33	7
ThrowScaleGirl09	ThrowScaleGirl934	34	35	8
ThrowScaleGirl09	ThrowScaleGirl936	36	38	9
ThrowScaleGirl09	ThrowScaleGirl939	39	42	10
ThrowScaleGirl09	ThrowScaleGirl943	43	45	11
ThrowScaleGirl09	ThrowScaleGirl946	46		12
ThrowScaleGirl09	ThrowScaleGirl947	47	50	13
ThrowScaleGirl10	ThrowScaleGirl100	0	21	1
ThrowScaleGirl10	ThrowScaleGirl1022	22	23	2
ThrowScaleGirl10	ThrowScaleGirl1024	24	25	3
ThrowScaleGirl10	ThrowScaleGirl1026	26	27	4
ThrowScaleGirl10	ThrowScaleGirl1028	28	33	6
ThrowScaleGirl10	ThrowScaleGirl1034	34	36	7
ThrowScaleGirl10	ThrowScaleGirl1037	37	38	8
ThrowScaleGirl10	ThrowScaleGirl1039	39	40	9
ThrowScaleGirl10	ThrowScaleGirl1041	41	44	10
ThrowScaleGirl10	ThrowScaleGirl1045	45	47	11
ThrowScaleGirl10	ThrowScaleGirl1048	48		12
ThrowScaleGirl10	ThrowScaleGirl1049	49	50	13
ThrowScaleGirl11	ThrowScaleGirl110	0	20	1
ThrowScaleGirl11	ThrowScaleGirl1121	21	27	2
ThrowScaleGirl11	ThrowScaleGirl1128	28	29	3
ThrowScaleGirl11	ThrowScaleGirl1130	30	32	4
ThrowScaleGirl11	ThrowScaleGirl1133	33	34	5
ThrowScaleGirl11	ThrowScaleGirl1135	35		6
ThrowScaleGirl11	ThrowScaleGirl1136	36	39	7
ThrowScaleGirl11	ThrowScaleGirl1140	40	41	8
ThrowScaleGirl11	ThrowScaleGirl1142	42		9
ThrowScaleGirl11	ThrowScaleGirl1143	43	46	10
ThrowScaleGirl11	ThrowScaleGirl1147	47	48	11
ThrowScaleGirl11	ThrowScaleGirl1149	49		12
ThrowScaleGirl11	ThrowScaleGirl1150	50		13
ThrowScaleGirl12	ThrowScaleGirl120	0	13	1
ThrowScaleGirl12	ThrowScaleGirl1214	14	25	3
ThrowScaleGirl12	ThrowScaleGirl1226	26	27	4
ThrowScaleGirl12	ThrowScaleGirl1228	28	39	7
ThrowScaleGirl12	ThrowScaleGirl1240	40	43	9
ThrowScaleGirl12	ThrowScaleGirl1244	44	47	10
ThrowScaleGirl12	ThrowScaleGirl1248	48	50	11
TotalAgilityScale1Boy06	TotalAgilityScale1Boy60	0	27	2
TotalAgilityScale1Boy06	TotalAgilityScale1Boy628	28	33	4
TotalAgilityScale1Boy06	TotalAgilityScale1Boy634	34	36	5
TotalAgilityScale1Boy06	TotalAgilityScale1Boy637	37	38	6
TotalAgilityScale1Boy06	TotalAgilityScale1Boy639	39	43	7
TotalAgilityScale1Boy06	TotalAgilityScale1Boy644	44	45	8
TotalAgilityScale1Boy06	TotalAgilityScale1Boy646	46	47	9
TotalAgilityScale1Boy06	TotalAgilityScale1Boy648	48	52	10
TotalAgilityScale1Boy06	TotalAgilityScale1Boy653	53	54	11
TotalAgilityScale1Boy06	TotalAgilityScale1Boy655	55	56	12
TotalAgilityScale1Boy06	TotalAgilityScale1Boy657	57	61	13
TotalAgilityScale1Boy06	TotalAgilityScale1Boy662	62	63	14
TotalAgilityScale1Boy06	TotalAgilityScale1Boy664	64		15
TotalAgilityScale1Boy06	TotalAgilityScale1Boy665	65	70	16
TotalAgilityScale1Boy06	TotalAgilityScale1Boy671	71	76	19
TotalAgilityScale1Boy07	TotalAgilityScale1Boy70	0	24	1
TotalAgilityScale1Boy07	TotalAgilityScale1Boy725	25	26	2
TotalAgilityScale1Boy07	TotalAgilityScale1Boy727	27	34	4
TotalAgilityScale1Boy07	TotalAgilityScale1Boy735	35	36	5
TotalAgilityScale1Boy07	TotalAgilityScale1Boy737	37	38	6
TotalAgilityScale1Boy07	TotalAgilityScale1Boy739	39	43	7
TotalAgilityScale1Boy07	TotalAgilityScale1Boy744	44	45	8
TotalAgilityScale1Boy07	TotalAgilityScale1Boy746	46	47	9
TotalAgilityScale1Boy07	TotalAgilityScale1Boy748	48	52	10
TotalAgilityScale1Boy07	TotalAgilityScale1Boy753	53	54	11
TotalAgilityScale1Boy07	TotalAgilityScale1Boy755	55	56	12
TotalAgilityScale1Boy07	TotalAgilityScale1Boy757	57	61	13
TotalAgilityScale1Boy07	TotalAgilityScale1Boy762	62	63	14
TotalAgilityScale1Boy07	TotalAgilityScale1Boy764	64	65	15
TotalAgilityScale1Boy07	TotalAgilityScale1Boy766	66	67	16
TotalAgilityScale1Boy07	TotalAgilityScale1Boy768	68	72	17
TotalAgilityScale1Boy07	TotalAgilityScale1Boy773	73	76	19
TotalAgilityScale1Boy08	TotalAgilityScale1Boy80	0	21	1
TotalAgilityScale1Boy08	TotalAgilityScale1Boy822	22	27	2
TotalAgilityScale1Boy08	TotalAgilityScale1Boy828	28	34	4
TotalAgilityScale1Boy08	TotalAgilityScale1Boy835	35		5
TotalAgilityScale1Boy08	TotalAgilityScale1Boy836	36	38	6
TotalAgilityScale1Boy08	TotalAgilityScale1Boy839	39	43	7
TotalAgilityScale1Boy08	TotalAgilityScale1Boy844	44	45	8
TotalAgilityScale1Boy08	TotalAgilityScale1Boy846	46	47	9
TotalAgilityScale1Boy08	TotalAgilityScale1Boy848	48	52	10
TotalAgilityScale1Boy08	TotalAgilityScale1Boy853	53	54	11
TotalAgilityScale1Boy08	TotalAgilityScale1Boy855	55	56	12
TotalAgilityScale1Boy08	TotalAgilityScale1Boy857	57	61	13
TotalAgilityScale1Boy08	TotalAgilityScale1Boy862	62	63	14
TotalAgilityScale1Boy08	TotalAgilityScale1Boy864	64	65	15
TotalAgilityScale1Boy08	TotalAgilityScale1Boy866	66	68	16
TotalAgilityScale1Boy08	TotalAgilityScale1Boy869	69	72	17
TotalAgilityScale1Boy08	TotalAgilityScale1Boy873	73	74	18
TotalAgilityScale1Boy09	TotalAgilityScale1Boy90	0	34	4
TotalAgilityScale1Boy09	TotalAgilityScale1Boy935	35	36	5
TotalAgilityScale1Boy09	TotalAgilityScale1Boy937	37	38	6
TotalAgilityScale1Boy09	TotalAgilityScale1Boy939	39	43	7
TotalAgilityScale1Boy09	TotalAgilityScale1Boy944	44	45	8
TotalAgilityScale1Boy09	TotalAgilityScale1Boy946	46	47	9
TotalAgilityScale1Boy09	TotalAgilityScale1Boy948	48	52	10
TotalAgilityScale1Boy09	TotalAgilityScale1Boy953	53	54	11
TotalAgilityScale1Boy09	TotalAgilityScale1Boy955	55	56	12
TotalAgilityScale1Boy09	TotalAgilityScale1Boy957	57	61	13
TotalAgilityScale1Boy09	TotalAgilityScale1Boy962	62	63	14
TotalAgilityScale1Boy09	TotalAgilityScale1Boy964	64	65	15
TotalAgilityScale1Boy09	TotalAgilityScale1Boy966	66	70	16
TotalAgilityScale1Boy09	TotalAgilityScale1Boy971	71	72	17
TotalAgilityScale1Boy09	TotalAgilityScale1Boy973	73		18
TotalAgilityScale1Boy10	TotalAgilityScale1Boy100	0	25	1
TotalAgilityScale1Boy10	TotalAgilityScale1Boy1026	26	29	3
TotalAgilityScale1Boy10	TotalAgilityScale1Boy1030	30	34	4
TotalAgilityScale1Boy10	TotalAgilityScale1Boy1035	35	36	5
TotalAgilityScale1Boy10	TotalAgilityScale1Boy1037	37	38	6
TotalAgilityScale1Boy10	TotalAgilityScale1Boy1039	39	43	7
TotalAgilityScale1Boy10	TotalAgilityScale1Boy1044	44	45	8
TotalAgilityScale1Boy10	TotalAgilityScale1Boy1046	46	47	9
TotalAgilityScale1Boy10	TotalAgilityScale1Boy1048	48	52	10
TotalAgilityScale1Boy10	TotalAgilityScale1Boy1053	53	54	11
TotalAgilityScale1Boy10	TotalAgilityScale1Boy1055	55	56	12
TotalAgilityScale1Boy10	TotalAgilityScale1Boy1057	57	61	13
TotalAgilityScale1Boy10	TotalAgilityScale1Boy1062	62	63	14
TotalAgilityScale1Boy10	TotalAgilityScale1Boy1064	64	65	15
TotalAgilityScale1Boy10	TotalAgilityScale1Boy1066	66	70	16
TotalAgilityScale1Boy11	TotalAgilityScale1Boy110	0	17	1
TotalAgilityScale1Boy11	TotalAgilityScale1Boy1118	18	28	3
TotalAgilityScale1Boy11	TotalAgilityScale1Boy1129	29	34	4
TotalAgilityScale1Boy11	TotalAgilityScale1Boy1135	35	36	5
TotalAgilityScale1Boy11	TotalAgilityScale1Boy1137	37	38	6
TotalAgilityScale1Boy11	TotalAgilityScale1Boy1139	39	43	7
TotalAgilityScale1Boy11	TotalAgilityScale1Boy1144	44	45	8
TotalAgilityScale1Boy11	TotalAgilityScale1Boy1146	46	47	9
TotalAgilityScale1Boy11	TotalAgilityScale1Boy1148	48	52	10
TotalAgilityScale1Boy11	TotalAgilityScale1Boy1153	53	54	11
TotalAgilityScale1Boy11	TotalAgilityScale1Boy1155	55	56	12
TotalAgilityScale1Boy11	TotalAgilityScale1Boy1157	57	61	13
TotalAgilityScale1Boy11	TotalAgilityScale1Boy1162	62	63	14
TotalAgilityScale1Boy11	TotalAgilityScale1Boy1164	64	65	15
TotalAgilityScale1Boy11	TotalAgilityScale1Boy1166	66	70	16
TotalAgilityScale1Boy12	TotalAgilityScale1Boy120	0	8	1
TotalAgilityScale1Boy12	TotalAgilityScale1Boy129	9	31	4
TotalAgilityScale1Boy12	TotalAgilityScale1Boy1232	32	36	5
TotalAgilityScale1Boy12	TotalAgilityScale1Boy1237	37	38	6
TotalAgilityScale1Boy12	TotalAgilityScale1Boy1239	39	43	7
TotalAgilityScale1Boy12	TotalAgilityScale1Boy1244	44	45	8
TotalAgilityScale1Boy12	TotalAgilityScale1Boy1246	46	47	9
TotalAgilityScale1Boy12	TotalAgilityScale1Boy1248	48	52	10
TotalAgilityScale1Boy12	TotalAgilityScale1Boy1253	53		11
TotalAgilityScale1Boy12	TotalAgilityScale1Boy1254	54	56	12
TotalAgilityScale1Boy12	TotalAgilityScale1Boy1257	57	61	13
TotalAgilityScale1Boy12	TotalAgilityScale1Boy1262	62		14
TotalAgilityScale1Boy12	TotalAgilityScale1Boy1263	63	64	15
TotalAgilityScale1Boy12	TotalAgilityScale1Boy1265	65	69	16
TotalAgilityScale1Girl06	TotalAgilityScale1Girl60	0	24	1
TotalAgilityScale1Girl06	TotalAgilityScale1Girl625	25	26	2
TotalAgilityScale1Girl06	TotalAgilityScale1Girl627	27	29	3
TotalAgilityScale1Girl06	TotalAgilityScale1Girl630	30	34	4
TotalAgilityScale1Girl06	TotalAgilityScale1Girl635	35		5
TotalAgilityScale1Girl06	TotalAgilityScale1Girl636	36	38	6
TotalAgilityScale1Girl06	TotalAgilityScale1Girl639	39	43	7
TotalAgilityScale1Girl06	TotalAgilityScale1Girl644	44	45	8
TotalAgilityScale1Girl06	TotalAgilityScale1Girl646	46	47	9
TotalAgilityScale1Girl06	TotalAgilityScale1Girl648	48	52	10
TotalAgilityScale1Girl06	TotalAgilityScale1Girl653	53	54	11
TotalAgilityScale1Girl06	TotalAgilityScale1Girl655	55	56	12
TotalAgilityScale1Girl06	TotalAgilityScale1Girl657	57	61	13
TotalAgilityScale1Girl06	TotalAgilityScale1Girl662	62	63	14
TotalAgilityScale1Girl06	TotalAgilityScale1Girl664	64	65	15
TotalAgilityScale1Girl06	TotalAgilityScale1Girl666	66	70	16
TotalAgilityScale1Girl06	TotalAgilityScale1Girl671	71	72	17
TotalAgilityScale1Girl06	TotalAgilityScale1Girl673	73		18
TotalAgilityScale1Girl06	TotalAgilityScale1Girl674	74	75	19
TotalAgilityScale1Girl07	TotalAgilityScale1Girl70	0	28	2
TotalAgilityScale1Girl07	TotalAgilityScale1Girl729	29		3
TotalAgilityScale1Girl07	TotalAgilityScale1Girl730	30	34	4
TotalAgilityScale1Girl07	TotalAgilityScale1Girl735	35	36	5
TotalAgilityScale1Girl07	TotalAgilityScale1Girl737	37	38	6
TotalAgilityScale1Girl07	TotalAgilityScale1Girl739	39	43	7
TotalAgilityScale1Girl07	TotalAgilityScale1Girl744	44	45	8
TotalAgilityScale1Girl07	TotalAgilityScale1Girl746	46	47	9
TotalAgilityScale1Girl07	TotalAgilityScale1Girl748	48	52	10
TotalAgilityScale1Girl07	TotalAgilityScale1Girl753	53	54	11
TotalAgilityScale1Girl07	TotalAgilityScale1Girl755	55	56	12
TotalAgilityScale1Girl07	TotalAgilityScale1Girl757	57	61	13
TotalAgilityScale1Girl07	TotalAgilityScale1Girl762	62	63	14
TotalAgilityScale1Girl07	TotalAgilityScale1Girl764	64	65	15
TotalAgilityScale1Girl07	TotalAgilityScale1Girl766	66	70	16
TotalAgilityScale1Girl07	TotalAgilityScale1Girl771	71	75	19
TotalAgilityScale1Girl08	TotalAgilityScale1Girl80	0	21	1
TotalAgilityScale1Girl08	TotalAgilityScale1Girl822	22	27	2
TotalAgilityScale1Girl08	TotalAgilityScale1Girl828	28	29	3
TotalAgilityScale1Girl08	TotalAgilityScale1Girl830	30	34	4
TotalAgilityScale1Girl08	TotalAgilityScale1Girl835	35	36	5
TotalAgilityScale1Girl08	TotalAgilityScale1Girl837	37	38	6
TotalAgilityScale1Girl08	TotalAgilityScale1Girl839	39	43	7
TotalAgilityScale1Girl08	TotalAgilityScale1Girl844	44	45	8
TotalAgilityScale1Girl08	TotalAgilityScale1Girl846	46	47	9
TotalAgilityScale1Girl08	TotalAgilityScale1Girl848	48	52	10
TotalAgilityScale1Girl08	TotalAgilityScale1Girl853	53	54	11
TotalAgilityScale1Girl08	TotalAgilityScale1Girl855	55	56	12
TotalAgilityScale1Girl08	TotalAgilityScale1Girl857	57	61	13
TotalAgilityScale1Girl08	TotalAgilityScale1Girl862	62	63	14
TotalAgilityScale1Girl08	TotalAgilityScale1Girl864	64	65	15
TotalAgilityScale1Girl08	TotalAgilityScale1Girl866	66	70	16
TotalAgilityScale1Girl08	TotalAgilityScale1Girl871	71		17
TotalAgilityScale1Girl08	TotalAgilityScale1Girl872	72	76	19
TotalAgilityScale1Girl09	TotalAgilityScale1Girl90	0	23	1
TotalAgilityScale1Girl09	TotalAgilityScale1Girl924	24	29	3
TotalAgilityScale1Girl09	TotalAgilityScale1Girl930	30	34	4
TotalAgilityScale1Girl09	TotalAgilityScale1Girl935	35	36	5
TotalAgilityScale1Girl09	TotalAgilityScale1Girl937	37	38	6
TotalAgilityScale1Girl09	TotalAgilityScale1Girl939	39	43	7
TotalAgilityScale1Girl09	TotalAgilityScale1Girl944	44	45	8
TotalAgilityScale1Girl09	TotalAgilityScale1Girl946	46	47	9
TotalAgilityScale1Girl09	TotalAgilityScale1Girl948	48	52	10
TotalAgilityScale1Girl09	TotalAgilityScale1Girl953	53	54	11
TotalAgilityScale1Girl09	TotalAgilityScale1Girl955	55	56	12
TotalAgilityScale1Girl09	TotalAgilityScale1Girl957	57	61	13
TotalAgilityScale1Girl09	TotalAgilityScale1Girl962	62	63	14
TotalAgilityScale1Girl09	TotalAgilityScale1Girl964	64	65	15
TotalAgilityScale1Girl09	TotalAgilityScale1Girl966	66	70	16
TotalAgilityScale1Girl09	TotalAgilityScale1Girl971	71	74	18
TotalAgilityScale1Girl09	TotalAgilityScale1Girl975	75	76	19
TotalAgilityScale1Girl10	TotalAgilityScale1Girl100	0	23	1
TotalAgilityScale1Girl10	TotalAgilityScale1Girl1024	24	34	4
TotalAgilityScale1Girl10	TotalAgilityScale1Girl1035	35	36	5
TotalAgilityScale1Girl10	TotalAgilityScale1Girl1037	37	38	6
TotalAgilityScale1Girl10	TotalAgilityScale1Girl1039	39	43	7
TotalAgilityScale1Girl10	TotalAgilityScale1Girl1044	44	45	8
TotalAgilityScale1Girl10	TotalAgilityScale1Girl1046	46	47	9
TotalAgilityScale1Girl10	TotalAgilityScale1Girl1048	48	52	10
TotalAgilityScale1Girl10	TotalAgilityScale1Girl1053	53	54	11
TotalAgilityScale1Girl10	TotalAgilityScale1Girl1055	55	56	12
TotalAgilityScale1Girl10	TotalAgilityScale1Girl1057	57	61	13
TotalAgilityScale1Girl10	TotalAgilityScale1Girl1062	62	63	14
TotalAgilityScale1Girl10	TotalAgilityScale1Girl1064	64	65	15
TotalAgilityScale1Girl10	TotalAgilityScale1Girl1066	66	69	16
TotalAgilityScale1Girl11	TotalAgilityScale1Girl110	0	24	1
TotalAgilityScale1Girl11	TotalAgilityScale1Girl1125	25	28	3
TotalAgilityScale1Girl11	TotalAgilityScale1Girl1129	29	34	4
TotalAgilityScale1Girl11	TotalAgilityScale1Girl1135	35	36	5
TotalAgilityScale1Girl11	TotalAgilityScale1Girl1137	37	38	6
TotalAgilityScale1Girl11	TotalAgilityScale1Girl1139	39	43	7
TotalAgilityScale1Girl11	TotalAgilityScale1Girl1144	44	45	8
TotalAgilityScale1Girl11	TotalAgilityScale1Girl1146	46	47	9
TotalAgilityScale1Girl11	TotalAgilityScale1Girl1148	48	52	10
TotalAgilityScale1Girl11	TotalAgilityScale1Girl1153	53	54	11
TotalAgilityScale1Girl11	TotalAgilityScale1Girl1155	55	56	12
TotalAgilityScale1Girl11	TotalAgilityScale1Girl1157	57	61	13
TotalAgilityScale1Girl11	TotalAgilityScale1Girl1162	62	63	14
TotalAgilityScale1Girl11	TotalAgilityScale1Girl1164	64	65	15
TotalAgilityScale1Girl11	TotalAgilityScale1Girl1166	66		16
TotalAgilityScale1Girl11	TotalAgilityScale1Girl1167	67	73	18
TotalAgilityScale1Girl11	TotalAgilityScale1Girl1174	74		19
TotalAgilityScale1Girl12	TotalAgilityScale1Girl120	0	18	1
TotalAgilityScale1Girl12	TotalAgilityScale1Girl1219	19	34	4
TotalAgilityScale1Girl12	TotalAgilityScale1Girl1235	35	38	6
TotalAgilityScale1Girl12	TotalAgilityScale1Girl1239	39	43	7
TotalAgilityScale1Girl12	TotalAgilityScale1Girl1244	44	45	8
TotalAgilityScale1Girl12	TotalAgilityScale1Girl1246	46	47	9
TotalAgilityScale1Girl12	TotalAgilityScale1Girl1248	48	52	10
TotalAgilityScale1Girl12	TotalAgilityScale1Girl1253	53	54	11
TotalAgilityScale1Girl12	TotalAgilityScale1Girl1255	55	56	12
TotalAgilityScale1Girl12	TotalAgilityScale1Girl1257	57	61	13
TotalAgilityScale1Girl12	TotalAgilityScale1Girl1262	62	63	14
TotalAgilityScale1Girl12	TotalAgilityScale1Girl1264	64		15
TotalAgilityScale1Girl12	TotalAgilityScale1Girl1265	65	68	16
TotalJumpHopScaleBoy06	TotalJumpHopScaleBoy60	0	3	1
TotalJumpHopScaleBoy06	TotalJumpHopScaleBoy64	4	5	2
TotalJumpHopScaleBoy06	TotalJumpHopScaleBoy66	6	15	4
TotalJumpHopScaleBoy06	TotalJumpHopScaleBoy616	16	20	5
TotalJumpHopScaleBoy06	TotalJumpHopScaleBoy621	21	23	6
TotalJumpHopScaleBoy06	TotalJumpHopScaleBoy624	24	30	7
TotalJumpHopScaleBoy06	TotalJumpHopScaleBoy631	31	32	8
TotalJumpHopScaleBoy06	TotalJumpHopScaleBoy633	33	36	9
TotalJumpHopScaleBoy06	TotalJumpHopScaleBoy637	37	43	10
TotalJumpHopScaleBoy06	TotalJumpHopScaleBoy644	44	47	11
TotalJumpHopScaleBoy06	TotalJumpHopScaleBoy648	48	50	12
TotalJumpHopScaleBoy06	TotalJumpHopScaleBoy651	51	56	13
TotalJumpHopScaleBoy06	TotalJumpHopScaleBoy657	57	60	14
TotalJumpHopScaleBoy07	TotalJumpHopScaleBoy70	0	6	1
TotalJumpHopScaleBoy07	TotalJumpHopScaleBoy77	7	10	2
TotalJumpHopScaleBoy07	TotalJumpHopScaleBoy711	11	13	3
TotalJumpHopScaleBoy07	TotalJumpHopScaleBoy714	14	20	4
TotalJumpHopScaleBoy07	TotalJumpHopScaleBoy721	21	24	5
TotalJumpHopScaleBoy07	TotalJumpHopScaleBoy725	25	27	6
TotalJumpHopScaleBoy07	TotalJumpHopScaleBoy728	28	34	7
TotalJumpHopScaleBoy07	TotalJumpHopScaleBoy735	35	37	8
TotalJumpHopScaleBoy07	TotalJumpHopScaleBoy738	38	41	9
TotalJumpHopScaleBoy07	TotalJumpHopScaleBoy742	42	48	10
TotalJumpHopScaleBoy07	TotalJumpHopScaleBoy749	49	52	11
TotalJumpHopScaleBoy07	TotalJumpHopScaleBoy753	53	54	12
TotalJumpHopScaleBoy07	TotalJumpHopScaleBoy755	55	60	13
TotalJumpHopScaleBoy08	TotalJumpHopScaleBoy80	0	11	1
TotalJumpHopScaleBoy08	TotalJumpHopScaleBoy812	12	13	2
TotalJumpHopScaleBoy08	TotalJumpHopScaleBoy814	14	18	3
TotalJumpHopScaleBoy08	TotalJumpHopScaleBoy819	19	25	4
TotalJumpHopScaleBoy08	TotalJumpHopScaleBoy826	26	28	5
TotalJumpHopScaleBoy08	TotalJumpHopScaleBoy829	29	31	6
TotalJumpHopScaleBoy08	TotalJumpHopScaleBoy832	32	37	7
TotalJumpHopScaleBoy08	TotalJumpHopScaleBoy838	38	40	8
TotalJumpHopScaleBoy08	TotalJumpHopScaleBoy841	41	43	9
TotalJumpHopScaleBoy08	TotalJumpHopScaleBoy844	44	48	10
TotalJumpHopScaleBoy08	TotalJumpHopScaleBoy849	49	53	11
TotalJumpHopScaleBoy08	TotalJumpHopScaleBoy854	54	56	12
TotalJumpHopScaleBoy08	TotalJumpHopScaleBoy857	57	60	13
TotalJumpHopScaleBoy09	TotalJumpHopScaleBoy90	0	13	1
TotalJumpHopScaleBoy09	TotalJumpHopScaleBoy914	14	17	2
TotalJumpHopScaleBoy09	TotalJumpHopScaleBoy918	18	21	3
TotalJumpHopScaleBoy09	TotalJumpHopScaleBoy922	22	27	4
TotalJumpHopScaleBoy09	TotalJumpHopScaleBoy928	28	30	5
TotalJumpHopScaleBoy09	TotalJumpHopScaleBoy931	31	34	6
TotalJumpHopScaleBoy09	TotalJumpHopScaleBoy935	35	40	7
TotalJumpHopScaleBoy09	TotalJumpHopScaleBoy941	41	43	8
TotalJumpHopScaleBoy09	TotalJumpHopScaleBoy944	44	46	9
TotalJumpHopScaleBoy09	TotalJumpHopScaleBoy947	47	52	10
TotalJumpHopScaleBoy09	TotalJumpHopScaleBoy953	53	56	11
TotalJumpHopScaleBoy09	TotalJumpHopScaleBoy957	57	59	12
TotalJumpHopScaleBoy09	TotalJumpHopScaleBoy960	60		13
TotalJumpHopScaleBoy10	TotalJumpHopScaleBoy100	0	30	1
TotalJumpHopScaleBoy10	TotalJumpHopScaleBoy1031	31	36	3
TotalJumpHopScaleBoy10	TotalJumpHopScaleBoy1037	37	40	4
TotalJumpHopScaleBoy10	TotalJumpHopScaleBoy1041	41	42	5
TotalJumpHopScaleBoy10	TotalJumpHopScaleBoy1043	43	44	6
TotalJumpHopScaleBoy10	TotalJumpHopScaleBoy1045	45	48	7
TotalJumpHopScaleBoy10	TotalJumpHopScaleBoy1049	49	50	8
TotalJumpHopScaleBoy10	TotalJumpHopScaleBoy1051	51	52	9
TotalJumpHopScaleBoy10	TotalJumpHopScaleBoy1053	53	56	10
TotalJumpHopScaleBoy10	TotalJumpHopScaleBoy1057	57	59	11
TotalJumpHopScaleBoy10	TotalJumpHopScaleBoy1060	60		12
TotalJumpHopScaleBoy11	TotalJumpHopScaleBoy110	0	31	1
TotalJumpHopScaleBoy11	TotalJumpHopScaleBoy1132	32	48	6
TotalJumpHopScaleBoy11	TotalJumpHopScaleBoy1149	49	52	7
TotalJumpHopScaleBoy11	TotalJumpHopScaleBoy1153	53		8
TotalJumpHopScaleBoy11	TotalJumpHopScaleBoy1154	54	55	9
TotalJumpHopScaleBoy11	TotalJumpHopScaleBoy1156	56	59	10
TotalJumpHopScaleBoy11	TotalJumpHopScaleBoy1160	60		11
TotalJumpHopScaleBoy12	TotalJumpHopScaleBoy120	0	25	1
[truncated: 490 more rows]

## Sheet: Test
Test
BounceScale
DynamicBalanceScale
LadderRunScale
LadderStepsScale
LongJumpScale
OverhandthrowScale
SideJumpScale
StaticBalanceScale
ThrowScale
TotalAgilityScale1
TotalJumpHopScale
TotalPERFFITSCale1
TotalSkillsScale1
