# Supplementary material for: Motor skills and fitness in African children: the PERF-FIT study
Source: Research Square preprint supplement (doi:10.21203/rs.3.rs-6033383/v1), 2025-02-28
Supplement: Supplementary file 2 [file d2ce0dcb173e8a3833562f0f.pdf]

## Filling out the excel sheet to obtain scale scores

### Background

|                      |             |                            |  |
|----------------------|-------------|----------------------------|--|
| <b>Child-ID</b>      | <b>0000</b> | <b>Score form PERF-FIT</b> |  |
| Name:                |             | Date of birth:             |  |
| Address:             |             | Test date:                 |  |
| School:              |             | Age:                       |  |
| Examined by:         |             | Sex:                       |  |
| Reason for referral: |             | By:                        |  |

Enter information of the child and ID.

Enter date of birth and test date in this format: 10-2-2025 (day month year).

Age: use pull-down menu for Age, choose between 6-12 years.

Sex: use pull-down menu for sex choose either Boy or Girl.

### Power and Agility Scale

| Item                  |        |        |             | Best or Total Score |
|-----------------------|--------|--------|-------------|---------------------|
| Running time (s)      | Trial1 | Trial2 | Extra Trial |                     |
| Running Mistakes (#)  | Trial1 | Trial2 | Extra Trial |                     |
| Stepping time (s)     | Trial1 | Trial2 | Extra Trial |                     |
| Stepping Mistakes (#) | Trial1 | Trial2 | Extra Trial |                     |
| Side jump (#)         | Trial1 |        | Trial2      |                     |
| Long jump (cm)        | Trial1 |        | Trial2      |                     |
| Overhead throw (cm)   | Trial1 |        | Trial2      |                     |

#### Item 1 and 2

Enter raw scores of the items 1 and 2 with 2 decimals.

Running time: trial 1 and 2 for instance 6,92. (dots or commas depend on your regional settings and format).

Running mistakes: add number of mistakes in.

If more than 3 mistakes in one of the trials of item 1 or 2 fill out the extra trial.

#### Items 3, 4 and 5

Side jump, Long jump, Overhead throw, always have 2 trials

The best score comes up automatically.

### Performance Scale

#### Item 6 and 7

| 10 balls per item | Two hands | Pref hand | Non-Pref | PH clap | NPH clap |
|-------------------|-----------|-----------|----------|---------|----------|
| Bouncing (max 50) |           |           |          |         |          |
| Throwing (max 50) |           |           |          |         |          |

Bouncing and Throwing: Enter number of correctly caught balls. If not enough balls are caught to continue the series (6 or more), the next cell will be grey. (So, you can't enter a score).

Total score per item will come up automatically.

### Item 8 and 9

|                                                        |                                                  |        |
|--------------------------------------------------------|--------------------------------------------------|--------|
| Static Balance Hug Right (Max 15)                      | Trial1                                           | Trial2 |
| Static Balance Hug Left (Max 15)                       | Trial1                                           | Trial2 |
| Static Balance Toe Right (Max 15)                      | Trial1                                           | Trial2 |
| Static Balance Toe Left (Max 15)                       | Trial1                                           | Trial2 |
| <b>Total Static Balance (Max 60 s)</b>                 | <b>Static Hug R + L + Static Toe R + L</b>       |        |
| Dynamic Balance Hug (Max 8)                            | Trial1                                           | Trial2 |
| Dynamic Balance Toe (Max 8)                            | Trial1                                           | Trial2 |
| Cans R (Max 8)<br>Not able to stand 3 sec on R enter 0 | Close                                            | Far    |
| Cans L (Max 8)<br>Not able to stand 3 sec on L enter 0 | Close                                            | Far    |
| <b>Total Dynamic Balance (Max 32 points)</b>           | <b>Dynamic Hug + Toe + Cans close + Cans far</b> |        |

Balance items: enter seconds for static items or steps for dynamic items. If max score is achieved on first trial the cell for the second trial will turn grey (So, you don't enter a score).

If children are not able to stand on one leg for 3 sec in Static balance items, don't administer Can task for that leg. Cell becomes gray.

Total score for balance items will come up automatically.

### Item 10

| <b>Jump Hop</b>                       | <b>Every square</b>                | <b>Every other</b> | <b>5 cm</b> | <b>10cm</b> |
|---------------------------------------|------------------------------------|--------------------|-------------|-------------|
| Jump Trial1                           |                                    |                    |             |             |
| Jump Trial2                           |                                    |                    |             |             |
| Hop Right Trial 1                     |                                    |                    |             |             |
| Hop Right Trial 2                     |                                    |                    |             |             |
| Hop Left Trial 1                      |                                    |                    |             |             |
| Hop Left Trial 2                      |                                    |                    |             |             |
| <b>Total Jump Hop (max 60 points)</b> | <b>Jump + Hop right + Hop left</b> |                    |             |             |

Jump and hop items: enter number of correct jumps or hops for each task in the series (every square, every other square, 5 cm and 10 cm foam).

Keep in mind the discontinuation rule which is 5 for the "every square" task and 3 for the rest of the series. The child has two trials to reach this required score. If maximum score is reached in first trial, then the cell for the second trial will be grey. So, you can't enter a score. If the child does not reach the required score to continue (discontinuation rule) the cell will also turn grey.

## Finding scale scores

| Item                  |       |       |             | Best or Total Score | Item Scaled Score |
|-----------------------|-------|-------|-------------|---------------------|-------------------|
| Running time (s)      | 7,80  | 5,70  | 6,00        | 8,00                |                   |
| Running Mistakes (#)  | 4     | 5     | 4           |                     | 13                |
| Stepping time (s)     | 15,78 | 14,67 | Extra Trial | 15,67               |                   |
| Stepping Mistakes (#) | 1     | 2     | Extra Trial |                     | 13                |

Once all raw data are entered, you need to look up the value of the Best or Total score in the pull-down menu in the yellow cells.

**Choose the value just below or equal to the values in the pull-down menu of the child's best or total raw score.**

- Example 1: the child's raw score equals 29 (grey cell). Select 29 in the pull-down and in this case the scale score (blue) is 12.

|    |    |       |
|----|----|-------|
| 29 | 12 | 29,00 |
| 17 |    | 0     |
| 16 |    | 8     |
| 15 |    | 16    |
| 48 | 10 | 18    |
|    |    | 19    |
|    |    | 22    |
|    |    | 23    |
|    |    | 25    |
|    |    | 28    |
|    |    | 29    |
|    |    | 30    |

- Example 2: If the exact value is not shown in the menu, select the value that is closest to the raw value, but lower. For instance, if a raw score of 48 (grey cell) needs to be converted to a scale score, the value 44 would be the first value below that score. In this case the scale score (blue cell) is 10.

|                    |    |       |
|--------------------|----|-------|
| 48                 | 10 | 44,00 |
| Total Scaled Score | 5  | 34    |
| Total Scaled Score | 7  | 86    |

Repeat this procedure for all variables as well as for the total scores.

|                               |            |      |                   |    |    |
|-------------------------------|------------|------|-------------------|----|----|
| Total Score Agility and Power | Percentile | 50,0 | Total Scale Score | 10 | 51 |
| Total Score Performance       | Percentile | 15,9 | Total Scale Score | 7  | 39 |
| Total Score PERF-FIT          | Percentile | 25,8 | Total Scale Score | 8  | 90 |
| Total Score Performance       | Percentile | 2,3  | Total Scale Score | 4  | 29 |
| Total Score PERF-FIT          | Percentile | 15,9 | Total Scale Score | 7  | 81 |

Percentile and classification (with classification color) will come up automatically. Green normal range, orange at risk (below average), red severe impairment (well below average).

### Saving data for future use.

|                      |              |                            |            |                                                                                                                                 |  |
|----------------------|--------------|----------------------------|------------|---------------------------------------------------------------------------------------------------------------------------------|--|
| <b>Child-ID</b>      | <b>0003</b>  | <b>Score form PERF-FIT</b> |            |                                                                                                                                 |  |
| Name:                | Dntwe        | Date of birth:             |            | <b>NB: FIRST print this form as PDF!</b><br>After printing: press <ctrl>-k to pass the results to the list and clear this form. |  |
| Address:             | PS           | Test date:                 |            |                                                                                                                                 |  |
| School:              | BSO          | Age:                       | 6          |                                                                                                                                 |  |
| Examined by:         | Claire       | Sex:                       | Girl       |                                                                                                                                 |  |
| Reason for referral: | Motor Delay? | By:                        | PE teacher |                                                                                                                                 |  |

After filling out the form and having obtained the scale scores and percentiles, the sheet can be printed or saved as pdf in the patient file or for the parents.

The data can be saved based on child ID (no name or personal information) in the spread sheet by using <CRT>-K. Only ID Sex Age and test outcomes are transferred.

| Child-ID | Ready | Gender | Age | LadderRunningTime1 | LadderRunningMistakes1 | LadderRunningTime2 | LadderRunningMistakes2 | LadderRunningTimeExtra | LadderRunningMistakesExtra | RunningBest | RunningScale | LadderSteppingTime1 |
|----------|-------|--------|-----|--------------------|------------------------|--------------------|------------------------|------------------------|----------------------------|-------------|--------------|---------------------|
| 0001     |       |        |     |                    |                        |                    |                        |                        |                            |             |              |                     |
| 0002     |       | Boy    | 12  | 5,59               | 0                      | 5,04               |                        | 1 Extra Trial          | Extra Trial                | 5,54        | 12           | 11,63               |
| 0003     |       |        |     |                    |                        |                    |                        |                        |                            |             |              |                     |
| 0004     |       |        |     |                    |                        |                    |                        |                        |                            |             |              |                     |

For clinical use, be sure that you can link the Child ID back to the child.

Example empty score form

|                                                        |                                                  |                            |                 |                                                                                                                                 |                 |                            |                         |
|--------------------------------------------------------|--------------------------------------------------|----------------------------|-----------------|---------------------------------------------------------------------------------------------------------------------------------|-----------------|----------------------------|-------------------------|
| <b>Child-ID</b>                                        | <b>0000</b>                                      | <b>Score form PERF-FIT</b> |                 |                                                                                                                                 |                 |                            |                         |
| Name:                                                  |                                                  | Date of birth:             |                 | <b>NB: FIRST print this form as PDF!</b><br>After printing: press <ctrl>-k to pass the results to the list and clear this form. |                 |                            |                         |
| Address:                                               |                                                  | Test date:                 |                 |                                                                                                                                 |                 |                            |                         |
| School:                                                |                                                  | Age:                       |                 |                                                                                                                                 |                 |                            |                         |
| Examined by:                                           |                                                  | Sex:                       |                 |                                                                                                                                 |                 |                            |                         |
| Reason for referral:                                   |                                                  | By:                        |                 |                                                                                                                                 |                 |                            |                         |
| <b>Item</b>                                            |                                                  |                            |                 |                                                                                                                                 |                 | <b>Best or Total Score</b> | <b>Item Scale Score</b> |
| Running time (s)                                       | Trial1                                           | Trial2                     | Extra Trial     |                                                                                                                                 |                 |                            |                         |
| Running Mistakes (#)                                   | Trial1                                           | Trial2                     | Extra Trial     |                                                                                                                                 |                 |                            | #N/A                    |
| Stepping time (s)                                      | Trial1                                           | Trial2                     | Extra Trial     |                                                                                                                                 |                 |                            |                         |
| Stepping Mistakes (#)                                  | Trial1                                           | Trial2                     | Extra Trial     |                                                                                                                                 |                 |                            | #N/A                    |
| Side jump (#)                                          | Trial1                                           |                            | Trial2          |                                                                                                                                 |                 |                            | #N/A                    |
| Long jump (cm)                                         | Trial1                                           |                            | Trial2          |                                                                                                                                 |                 |                            | #N/A                    |
| Overhead throw (cm)                                    | Trial1                                           |                            | Trial2          |                                                                                                                                 |                 |                            | #N/A                    |
| <b>Total Score Agility and Power</b>                   | <b>Percentile</b>                                | <b>#N/A</b>                |                 | <b>Total Scale Score</b>                                                                                                        | <b>#N/A</b>     | <b>#N/A</b>                |                         |
| <b>10 balls per item</b>                               | <b>Two hands</b>                                 | <b>Pref hand</b>           | <b>Non-Pref</b> | <b>PH clap</b>                                                                                                                  | <b>NPH clap</b> |                            |                         |
| Bouncing (max 50)                                      |                                                  |                            |                 |                                                                                                                                 |                 |                            | #N/A                    |
| Throwing (max 50)                                      |                                                  |                            |                 |                                                                                                                                 |                 |                            | #N/A                    |
| Static Balance Hug Right (Max 15)                      | Trial1                                           |                            | Trial2          |                                                                                                                                 |                 |                            |                         |
| Static Balance Hug Left (Max 15)                       | Trial1                                           |                            | Trial2          |                                                                                                                                 |                 |                            |                         |
| Static Balance Foot Right (Max 15)                     | Trial1                                           |                            | Trial2          |                                                                                                                                 |                 |                            |                         |
| Static Balance Foot Left (Max 15)                      | Trial1                                           |                            | Trial2          |                                                                                                                                 |                 |                            |                         |
| <b>Total Static Balance (Max 60 s)</b>                 | <b>Static Hug R + L + Static Toe R + L</b>       |                            |                 |                                                                                                                                 |                 |                            |                         |
| Dynamic Balance Hug (Max 8)                            | Trial1                                           |                            | Trial2          |                                                                                                                                 |                 |                            |                         |
| Dynamic Balance Foot (Max 8)                           | Trial1                                           |                            | Trial2          |                                                                                                                                 |                 |                            |                         |
| Cans R (Max 8)<br>Not able to stand 3 sec on R enter 0 | Close                                            |                            | Far             |                                                                                                                                 |                 |                            |                         |
| Cans L (Max 8)<br>Not able to stand 3 sec on L enter 0 | Close                                            |                            | Far             |                                                                                                                                 |                 |                            |                         |
| <b>Total Dynamic Balance (Max 32 points)</b>           | <b>Dynamic Hug + Toe + Cans close + Cans far</b> |                            |                 |                                                                                                                                 |                 |                            |                         |
| <b>Jump Hop</b>                                        | <b>Every square</b>                              | <b>Every other</b>         | <b>5 cm</b>     | <b>10cm</b>                                                                                                                     |                 |                            |                         |
| Jump Trial1                                            |                                                  |                            |                 |                                                                                                                                 |                 |                            |                         |
| Jump Trial2                                            |                                                  |                            |                 |                                                                                                                                 |                 |                            |                         |
| Hop Right Trial 1                                      |                                                  |                            |                 |                                                                                                                                 |                 |                            |                         |
| Hop Right Trial 2                                      |                                                  |                            |                 |                                                                                                                                 |                 |                            |                         |
| Hop Left Trial 1                                       |                                                  |                            |                 |                                                                                                                                 |                 |                            |                         |
| Hop Left Trial 2                                       |                                                  |                            |                 |                                                                                                                                 |                 |                            |                         |
| <b>Total Jump Hop (max 60 points)</b>                  | <b>Jump + Hop right + Hop left</b>               |                            |                 |                                                                                                                                 |                 |                            |                         |
| <b>Total Score Performance</b>                         | <b>Percentile</b>                                | <b>#N/A</b>                |                 | <b>Total Scale Score</b>                                                                                                        | <b>#N/A</b>     | <b>#N/A</b>                |                         |
| <b>Total Score PERF-FIT</b>                            | <b>Percentile</b>                                | <b>#N/A</b>                |                 | <b>Total Scale Score</b>                                                                                                        | <b>#N/A</b>     | <b>#N/A</b>                |                         |
| <b>Summary of test observations</b>                    |                                                  |                            |                 |                                                                                                                                 |                 |                            |                         |
|                                                        |                                                  |                            |                 |                                                                                                                                 |                 |                            |                         |
| <b>Actions</b>                                         |                                                  |                            |                 |                                                                                                                                 |                 |                            |                         |
|                                                        |                                                  |                            |                 |                                                                                                                                 |                 |                            |                         |

# Example saved score form

|                                                        |                                                  |                            |                 |                                                                                                                                 |                          |                            |                         |
|--------------------------------------------------------|--------------------------------------------------|----------------------------|-----------------|---------------------------------------------------------------------------------------------------------------------------------|--------------------------|----------------------------|-------------------------|
| <b>Child-ID</b>                                        | <b>0003</b>                                      | <b>Score form PERF-FIT</b> |                 |                                                                                                                                 |                          |                            |                         |
| Name:                                                  | Dntwe                                            | Date of birth:             |                 | <b>NB: FIRST print this form as PDF!</b><br>After printing: press <ctrl>-k to pass the results to the list and clear this form. |                          |                            |                         |
| Address:                                               | PS                                               | Test date:                 |                 |                                                                                                                                 |                          |                            |                         |
| School:                                                | BSO                                              | Age:                       | 6               |                                                                                                                                 |                          |                            |                         |
| Examined by:                                           | Claire                                           | Sex:                       | Girl            |                                                                                                                                 |                          |                            |                         |
| Reason for referral:                                   | Motor Delay?                                     | By:                        | PE teacher      |                                                                                                                                 |                          |                            |                         |
| <b>Item</b>                                            |                                                  |                            |                 |                                                                                                                                 |                          | <b>Best or Total Score</b> | <b>Item Scale Score</b> |
| Running time (s)                                       | 8,10                                             | 9,00                       | Extra Trial     |                                                                                                                                 |                          | 8,10                       |                         |
| Running Mistakes (#)                                   | 0                                                | 1                          | Extra Trial     |                                                                                                                                 |                          |                            | 13                      |
| Stepping time (s)                                      | 22,40                                            | 26,00                      | Extra Trial     |                                                                                                                                 |                          | 22,90                      |                         |
| Stepping Mistakes (#)                                  | 1                                                | 2                          | Extra Trial     |                                                                                                                                 |                          |                            | 8                       |
| Side jump (#)                                          | 18                                               |                            | 15              |                                                                                                                                 |                          | 18                         | 12                      |
| Long jump (cm)                                         | 101                                              |                            | 93              |                                                                                                                                 |                          | 101                        | 12                      |
| Overhead throw (cm)                                    | 98                                               |                            | 110             |                                                                                                                                 |                          | 110                        | 7                       |
| <b>Total Score Agility and Power</b>                   | <b>Percentile</b>                                | <b>50,0</b>                |                 |                                                                                                                                 | <b>Total Scale Score</b> | <b>10</b>                  | <b>52</b>               |
| <b>10 balls per item</b>                               | <b>Two hands</b>                                 | <b>Pref hand</b>           | <b>Non-Pref</b> | <b>PH clap</b>                                                                                                                  | <b>NPH clap</b>          |                            |                         |
| Bouncing (max 50)                                      | 5                                                |                            |                 |                                                                                                                                 |                          | 5                          | 7                       |
| Throwing (max 50)                                      | 3                                                |                            |                 |                                                                                                                                 |                          | 3                          | 5                       |
| Static Balance Hug Right (Max 15)                      | 5,0                                              |                            | 5,0             |                                                                                                                                 |                          | 5,0                        |                         |
| Static Balance Hug Left (Max 15)                       | 7,0                                              |                            | 2,0             |                                                                                                                                 |                          | 7,0                        |                         |
| Static Balance Foot Right (Max 15)                     | 6,0                                              |                            | 10,0            |                                                                                                                                 |                          | 10,0                       |                         |
| Static Balance Foot Left (Max 15)                      | 2,0                                              |                            | 4,0             |                                                                                                                                 |                          | 4,0                        |                         |
| <b>Total Static Balance (Max 60 s)</b>                 | <b>Static Hug R + L + Static Toe R + L</b>       |                            |                 |                                                                                                                                 |                          | <b>26,0</b>                | <b>6</b>                |
| Dynamic Balance Hug (Max 8)                            | 6                                                |                            | 4               |                                                                                                                                 |                          | 6                          |                         |
| Dynamic Balance Foot (Max 8)                           | 4                                                |                            | 5               |                                                                                                                                 |                          | 5                          |                         |
| Cans R (Max 8)<br>Not able to stand 3 sec on R enter 0 | 0                                                |                            | 0               |                                                                                                                                 |                          |                            |                         |
| Cans L (Max 8)<br>Not able to stand 3 sec on L enter 0 | 0                                                |                            | 1               |                                                                                                                                 |                          | 1                          |                         |
| <b>Total Dynamic Balance (Max 32 points)</b>           | <b>Dynamic Hug + Toe + Cans close + Cans far</b> |                            |                 |                                                                                                                                 |                          | <b>12</b>                  | <b>5</b>                |
| <b>Jump Hop</b>                                        | <b>Every square</b>                              | <b>Every other</b>         | <b>5 cm</b>     | <b>10cm</b>                                                                                                                     |                          |                            |                         |
| Jump Trial1                                            | 7                                                | 3                          | 4               | 3                                                                                                                               | 18                       |                            |                         |
| Jump Trial2                                            | 3                                                | 4                          |                 | 3                                                                                                                               |                          |                            |                         |
| Hop Right Trial 1                                      | 5                                                | 1                          |                 |                                                                                                                                 | 7                        |                            |                         |
| Hop Right Trial 2                                      | 6                                                | 0                          |                 |                                                                                                                                 |                          |                            |                         |
| Hop Left Trial 1                                       | 0                                                |                            |                 |                                                                                                                                 |                          |                            |                         |
| Hop Left Trial 2                                       | 0                                                |                            |                 |                                                                                                                                 |                          |                            |                         |
| <b>Total Jump Hop (max 60 points)</b>                  | <b>Jump + Hop right + Hop left</b>               |                            |                 |                                                                                                                                 | <b>25</b>                | <b>7</b>                   |                         |
| <b>Total Score Performance</b>                         | <b>Percentile</b>                                | <b>2,3</b>                 |                 |                                                                                                                                 | <b>Total Scale Score</b> | <b>4</b>                   | <b>30</b>               |
| <b>Total Score PERF-FIT</b>                            | <b>Percentile</b>                                | <b>15,9</b>                |                 |                                                                                                                                 | <b>Total Scale Score</b> | <b>7</b>                   | <b>82</b>               |
| <b>Summary of test observations</b>                    |                                                  |                            |                 |                                                                                                                                 |                          |                            |                         |
|                                                        |                                                  |                            |                 |                                                                                                                                 |                          |                            |                         |
| <b>Actions</b>                                         |                                                  |                            |                 |                                                                                                                                 |                          |                            |                         |
|                                                        |                                                  |                            |                 |                                                                                                                                 |                          |                            |                         |
