# Supplementary material for: Motor skills and fitness in African children: the PERF-FIT study
Source: Research Square preprint supplement (doi:10.21203/rs.3.rs-6033383/v1), 2025-02-28
Supplement: Supplementary file 3 [file f427f5fa7276d80e2f8b79b3.pdf]

## Filling out the PERF-FIT using the app

[https://perffit-calculator.shinyapps.io/Calculator\\_version3/](https://perffit-calculator.shinyapps.io/Calculator_version3/)

### Use Score form PERF-FIT for app.

- Fill out all the raw values on the paper score form by hand.
- Determine Best score for Item 1-5 and Sum score for item 6-10. *For Running and Stepping the best score is lowest value (is the fastest time)!*
- Use the App to look up the scale scores
  - Enter age and sex in the app
  - Enter raw score per item and click “calculate” to get the scale score that belongs to the entered raw score
  - Write these scales scores for each item on the paper score form.
  - Add up scale scores for items 1-5 on the paper score form, enter this sum in the app to calculate Total Agility Scale
  - Add up scale scores for items 6-10 on the paper score form, enter this sum in the app to calculate Total Skills
  - Add up scale scores for items 1-10 on the paper score form, enter this sum in the app to calculate Total PERF-FIT

## PERFFIT Scale Calculator

### Sidebar for Long Jump

Enter the name of the child

Enter the age of the child

Select Sex of the child

Enter raw score

Change the raw score before the next calculation

Calculate

Reset

The child's name is: Piet  
The child's age is: 12  
The child's gender is: Male  
The child's raw score is: 140

The calculated Long Jump Scale score: 10

## Score form PERF-FIT

Name:  
Address:  
School:  
Examined by:  
Reason for referral:

Date of birth:  
Test date:  
Age:  
Sex:  
Tested by:

| Item                                           |              |           |          |                    |          |                      | Best or total score | Item Scale Score |
|------------------------------------------------|--------------|-----------|----------|--------------------|----------|----------------------|---------------------|------------------|
| Running time (s)                               | Trial1       | Trial 2   |          | Extra trial?       |          |                      |                     |                  |
| Running Mistakes (#)<br>Add 0.5 s per mistake  | (#)          | (#)       |          | (#)                |          | s                    | 1                   |                  |
| Stepping time (s)                              | Trial1       | Trial 2   |          | Extra trial?       |          |                      |                     |                  |
| Stepping Mistakes (#)<br>Add 0.5 s per mistake | (#)          | (#)       |          | (#)                |          | s                    | 2                   |                  |
| Side jump (#)                                  | Trial1       |           | Trial 2  |                    |          | #                    | 3                   |                  |
| Long jump (cm)                                 | Trial1       |           | Trial 2  |                    |          | cm                   | 4                   |                  |
| Overhead throw (cm)                            | Trial1       |           | Trial 2  |                    |          | cm                   | 5                   |                  |
| Total score Agility and Power Items 1-5        | Percentile   |           |          | Total Scaled Score |          | Sum SS               |                     |                  |
| 10 balls per item                              | Two hands    | Pref hand | Non-Pref | PH clap            | NPH clap | Add score of 5 items |                     |                  |
| Bouncing (max 50)                              |              |           |          |                    |          | #                    | 6                   |                  |
| Catching (max 50)                              |              |           |          |                    |          | #                    | 7                   |                  |
|                                                |              |           |          |                    |          |                      |                     |                  |
| Static Balance Hug Right (Max 15)              | Right Trial1 |           |          | Right Trial2       |          | s                    |                     |                  |
| Static Balance Hug Left (Max 15)               | Left Trial1  |           |          | Left Trial2        |          | s                    |                     |                  |

|                                                        |                                          |                 |                   |               |                                      |    |
|--------------------------------------------------------|------------------------------------------|-----------------|-------------------|---------------|--------------------------------------|----|
| Static Balance Toe Right (Max 15)                      | Right Trial1                             |                 | Right Trial2      |               | s                                    |    |
| Static Balance Toe Left (Max 15)                       | Left Trial1                              |                 | Left Trial2       |               | s                                    |    |
| Total Static Balance (Max 60 s)                        | Static Hug R + l +Static Toe R + L       |                 |                   |               | s                                    | 8  |
| Dynamic Balance Hug (Max 8)                            | Trial1                                   |                 | Trial 2           |               | #                                    |    |
| Dynamic Balance Toe (Max 8)                            | Trial1                                   |                 | Trial 2           |               | #                                    |    |
| Cans R (Max 8)<br>Not able to stand 3 sec on R enter 0 | Close                                    |                 | Far               |               | #                                    |    |
| Cans L (Max 8)<br>Not able to stand 3 sec on L enter 0 | Close                                    |                 | Far               |               | #                                    |    |
| Total Dynamic Balance (Max 32 points)                  | Dynamic Hug + Toe + Cans close+ Cans far |                 |                   |               | #                                    | 9  |
| Jump Hop                                               | Every square (8)                         | Every other (4) | Foam 5cm (4)      | Foam 10cm (4) |                                      |    |
| Jump Trial1                                            |                                          |                 |                   |               | Total #<br>Jump<br>Max<br>20         |    |
| Jump Trial2                                            |                                          |                 |                   |               |                                      |    |
| Hop Right Trial 1                                      |                                          |                 |                   |               | Total #<br>Hop<br>Right<br>Max<br>20 |    |
| Hop Right Trial 2                                      |                                          |                 |                   |               |                                      |    |
| Hop Left Trial 1                                       |                                          |                 |                   |               | Total #Hop<br>Left<br>Max<br>20      |    |
| Hop Left Trial 2                                       |                                          |                 |                   |               |                                      |    |
| Total Jump Hop (Max 60)                                | Jump+ Hop right+ Hop left                |                 |                   |               | #                                    | 10 |
| Total score Performance Items 6-10                     | Percentile                               |                 | Total Scale Score |               | Sum Scale Score                      |    |
| Total score PERF-FIT Items 1-10                        | Percentile                               |                 | Total Scale Score |               | Sum Scale Score                      |    |

Summary of test observations:

Actions:
